# Supplementary material for: Protective role of neuronal and lymphoid cannabinoid CB2 receptors in neuropathic pain
Source: eLife journal article supplement (doi:10.7554/elife.55582), 2020-07-20

**A**

CB2r-GFP in Dorsal Root Ganglia Neurons

C57Bl/6J SHAM

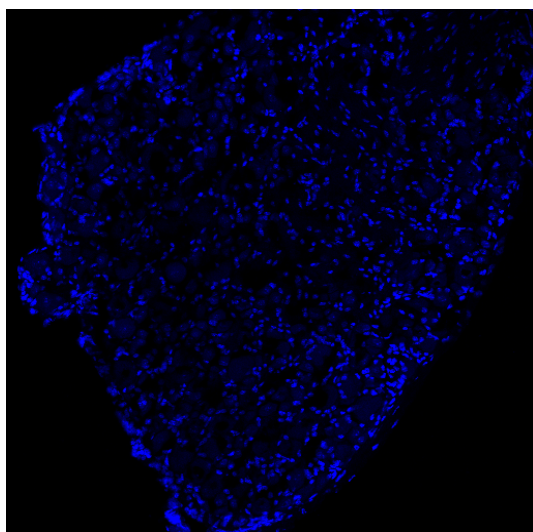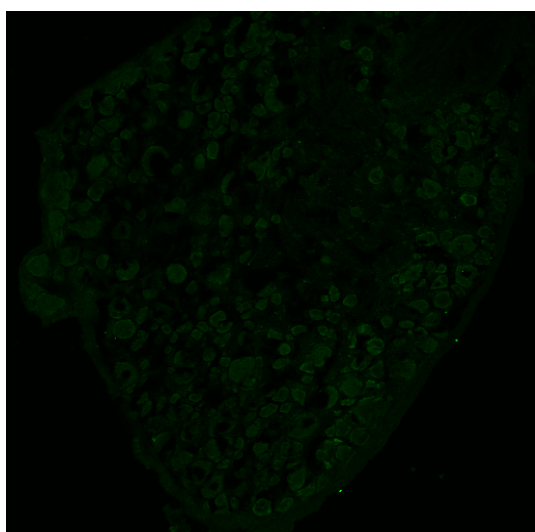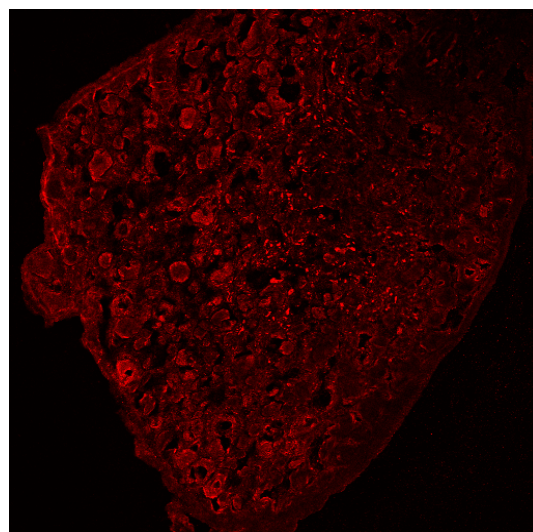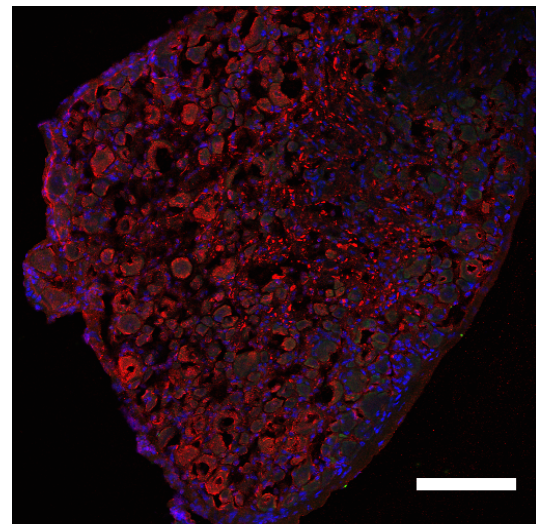

C57Bl/6J PSNL

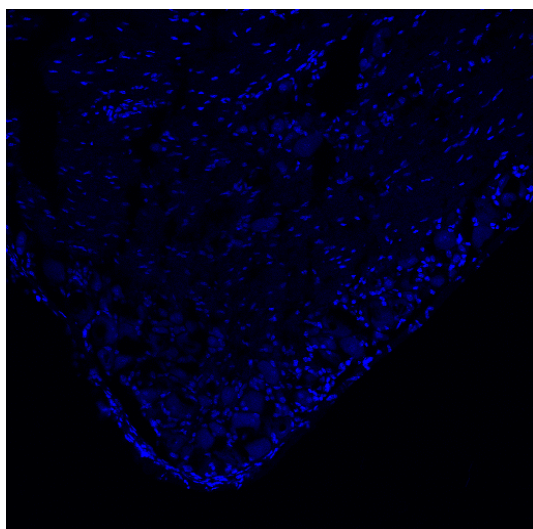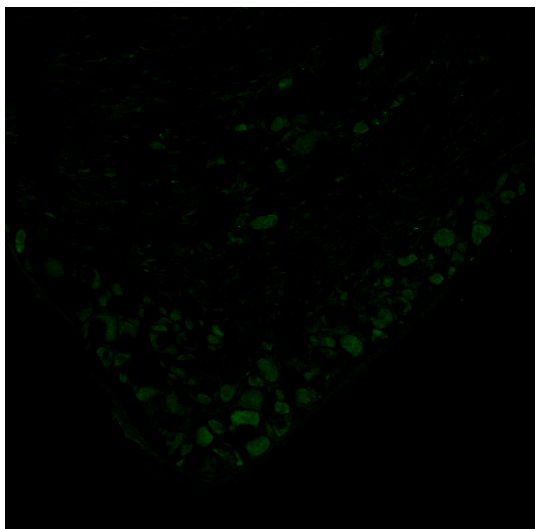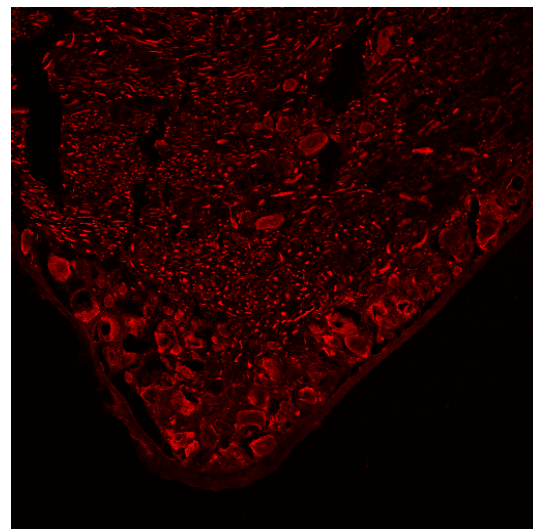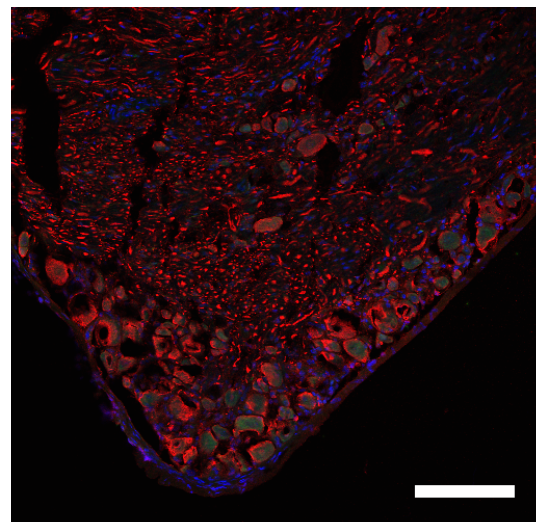

CB2-GFP SHAM

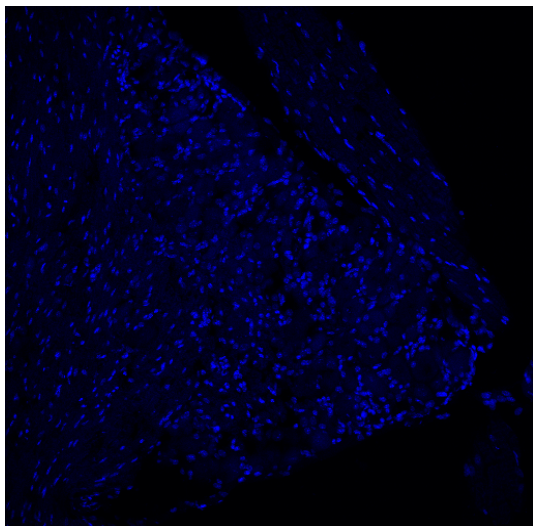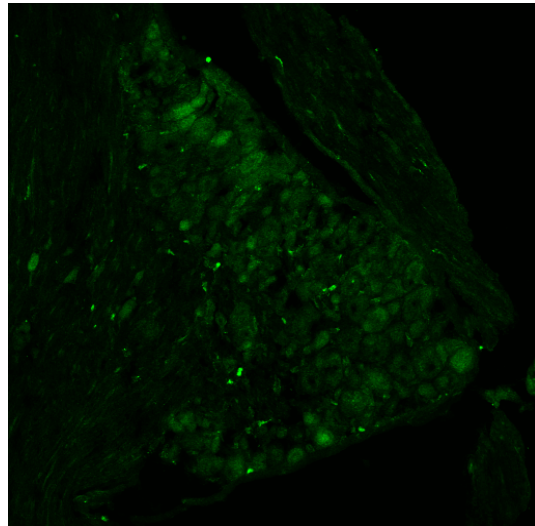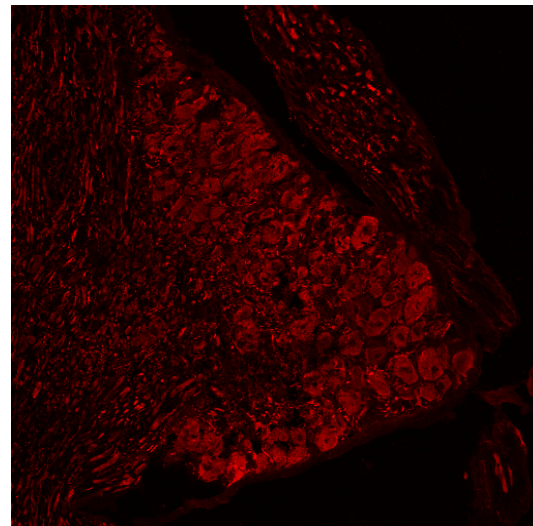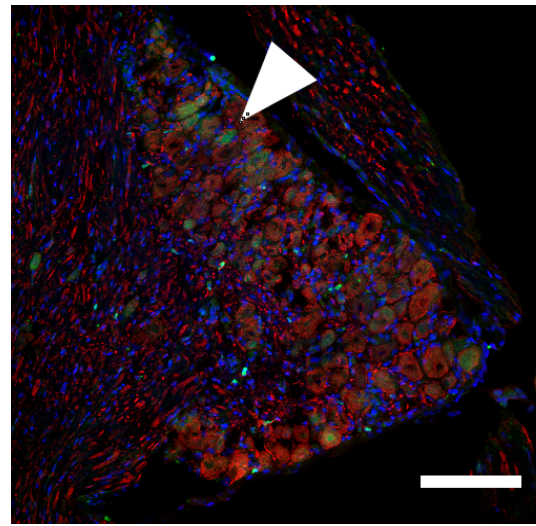

CB2-GFP PSNL

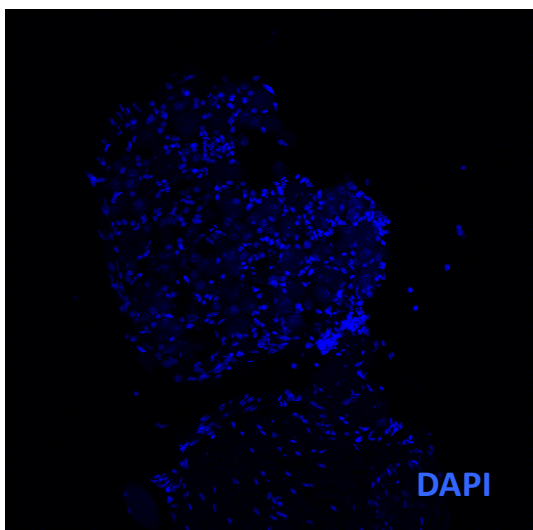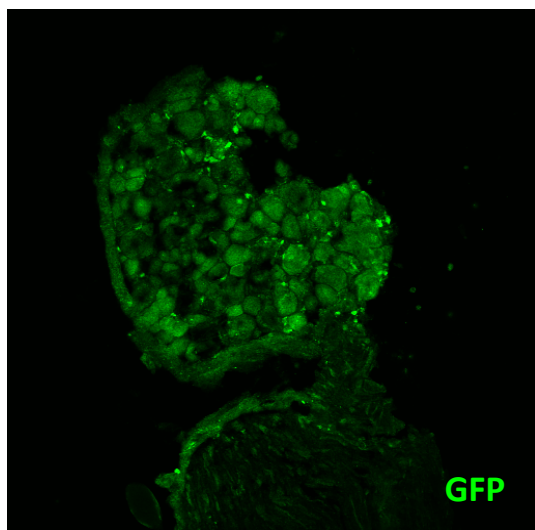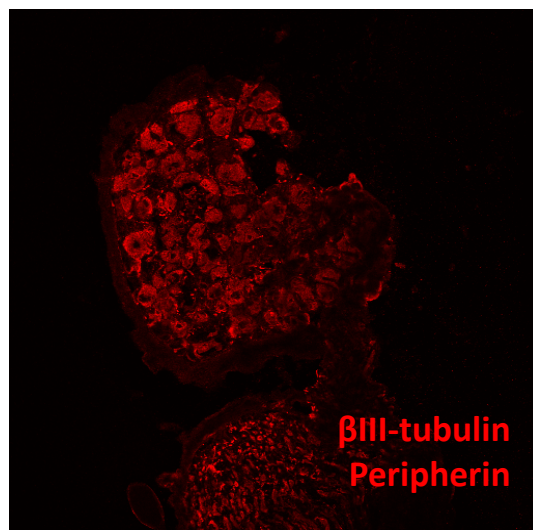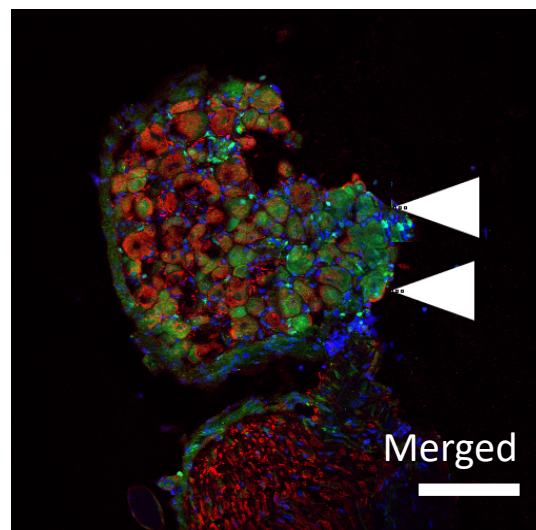

**B**

CB2r-GFP in Dorsal Root Ganglia Neurons

CB2-GFP PSNL

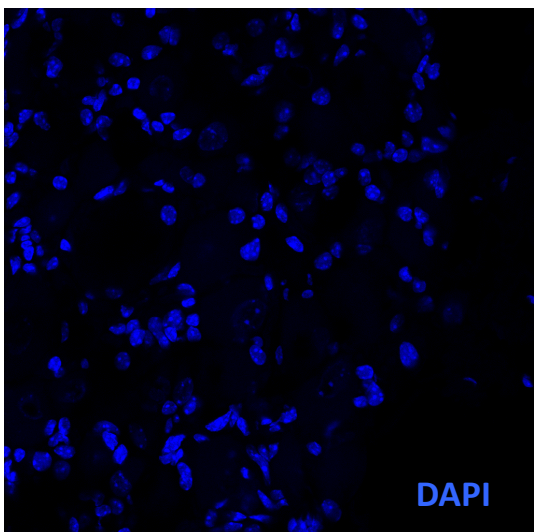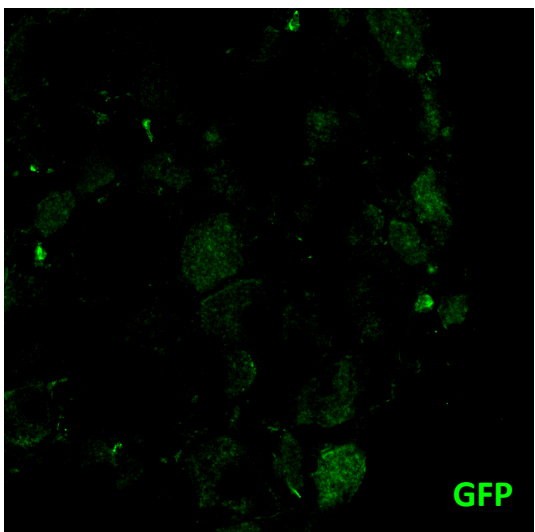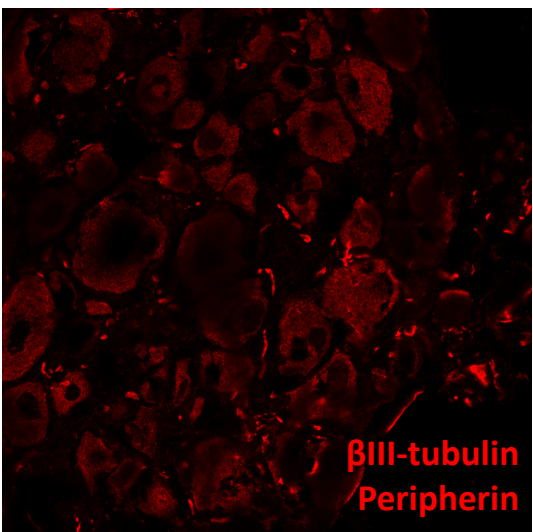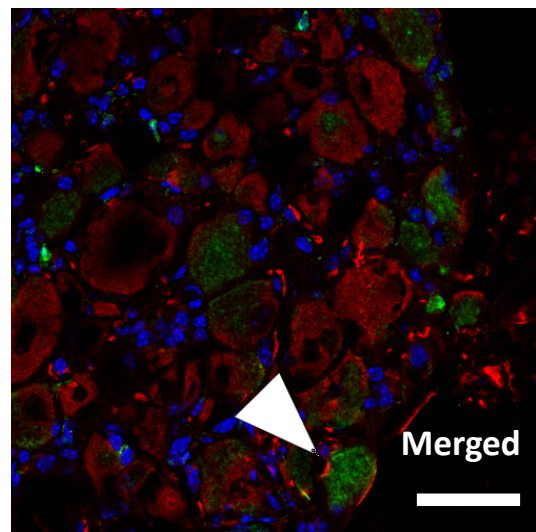

Supplement: supp [file elife-55582-supp-v1.zip › elife_poa_e55582_Figure_4_figure_supplement_4.pdf]
