# Supplementary material for: Protective role of neuronal and lymphoid cannabinoid CB2 receptors in neuropathic pain
Source: eLife journal article supplement (doi:10.7554/elife.55582), 2020-07-20

Figure 4-figure supplement 8

Controls for antibody specificity in Dorsal Root Ganglia

**A**

X 1ary Abs  
X 2ary Abs

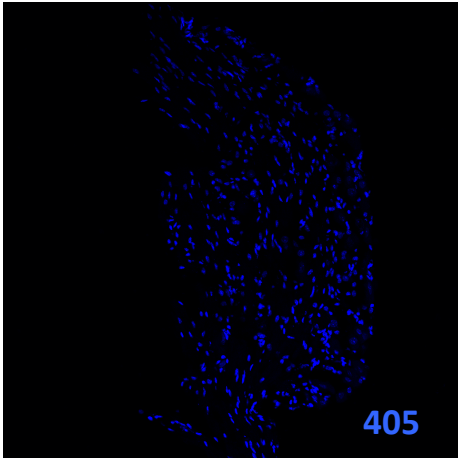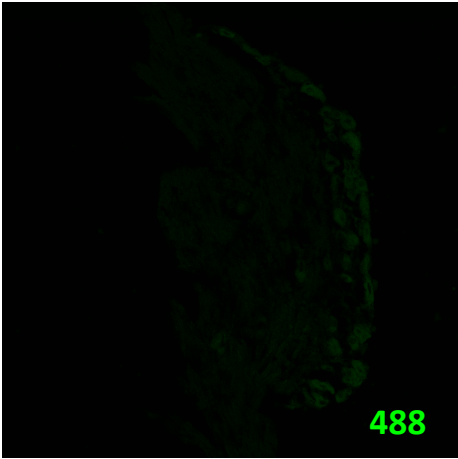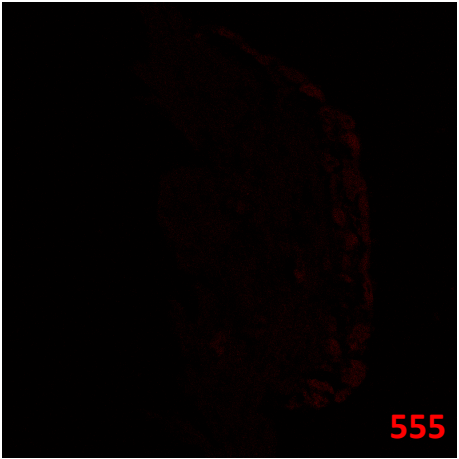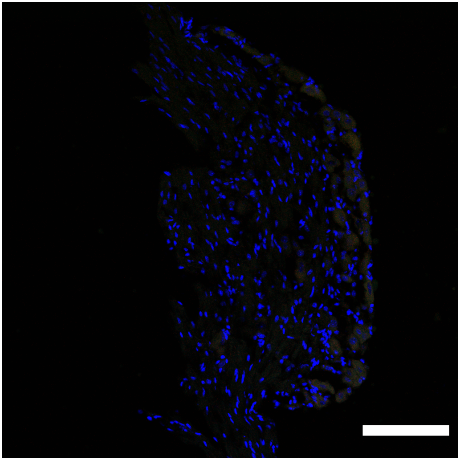

**B**

X anti-GFP  
✓ anti-rabbit HRP

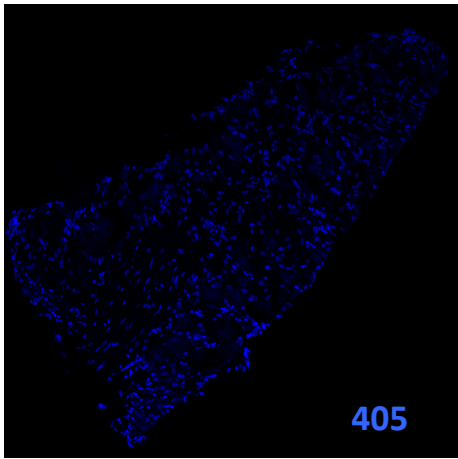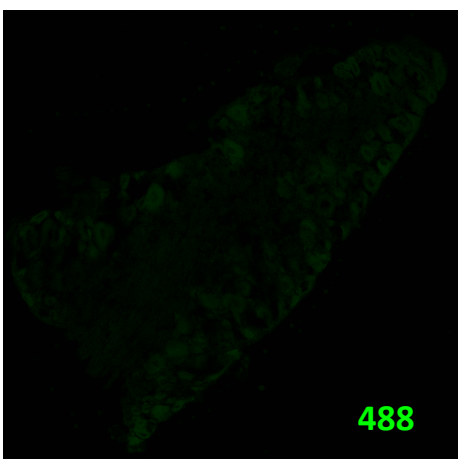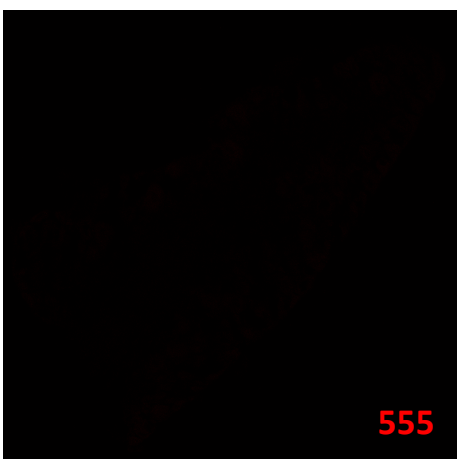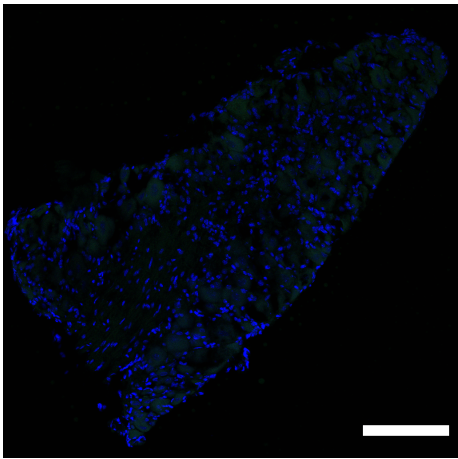

**C**

X 1ary Abs  
✓ anti-rabbit A555

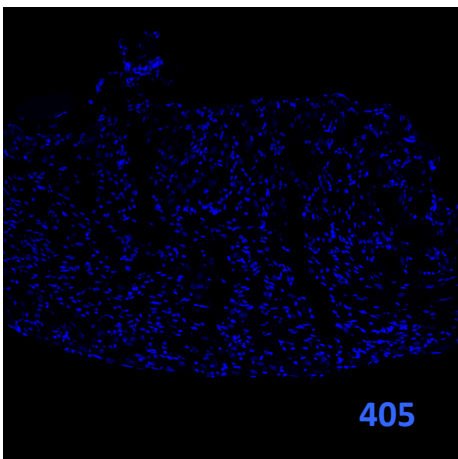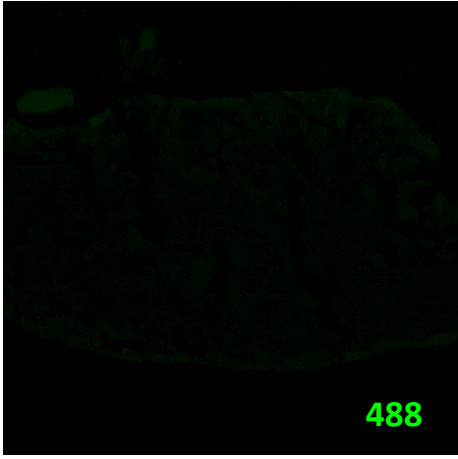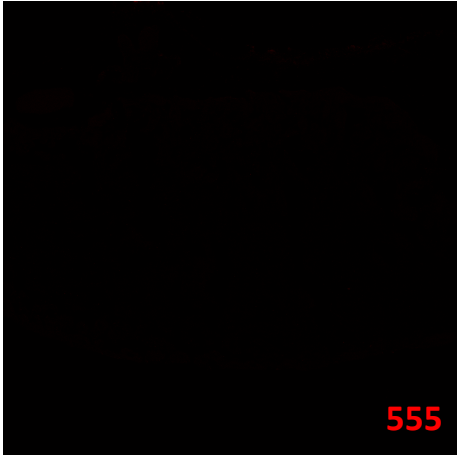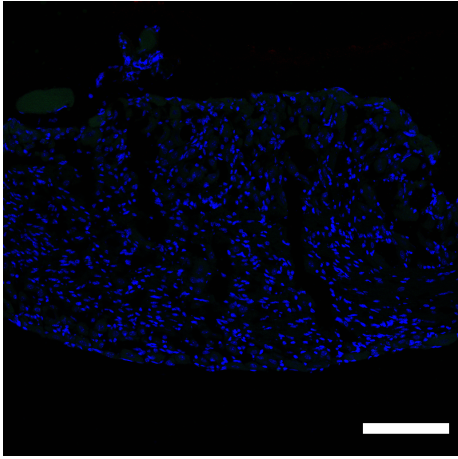

**D**

X 1ary Abs  
✓ anti-rat A555

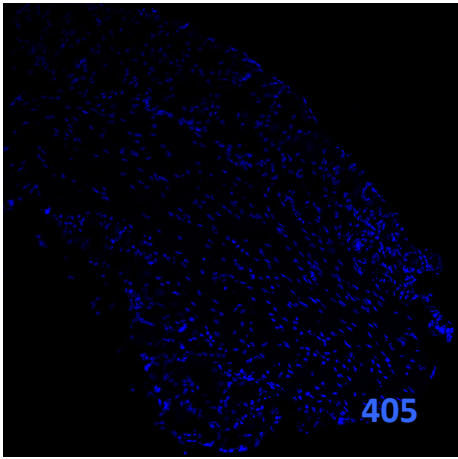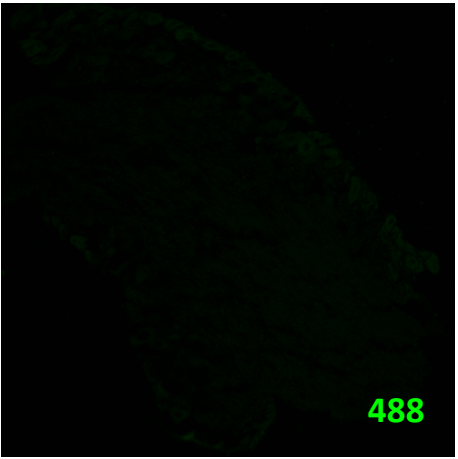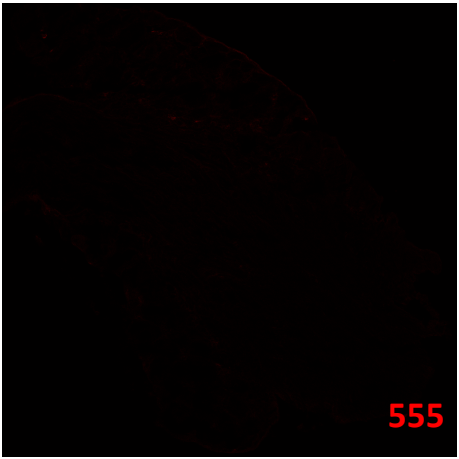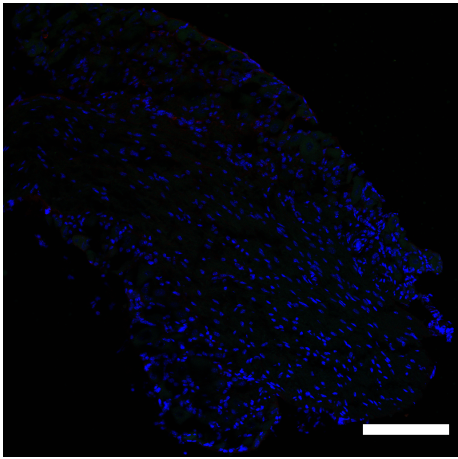

Supplement: supp [file elife-55582-supp-v1.zip › elife_poa_e55582_Figure_4_figure_supplement_8.pdf]
