# Supplementary material for: Protective role of neuronal and lymphoid cannabinoid CB2 receptors in neuropathic pain
Source: eLife journal article supplement (doi:10.7554/elife.55582), 2020-07-20
Supplement: supp [file elife-55582-supp-v1.zip]

Non-neuronal CB2r-GFP+ cells in the Dorsal Root Ganglia

C57BL/6J SHAM

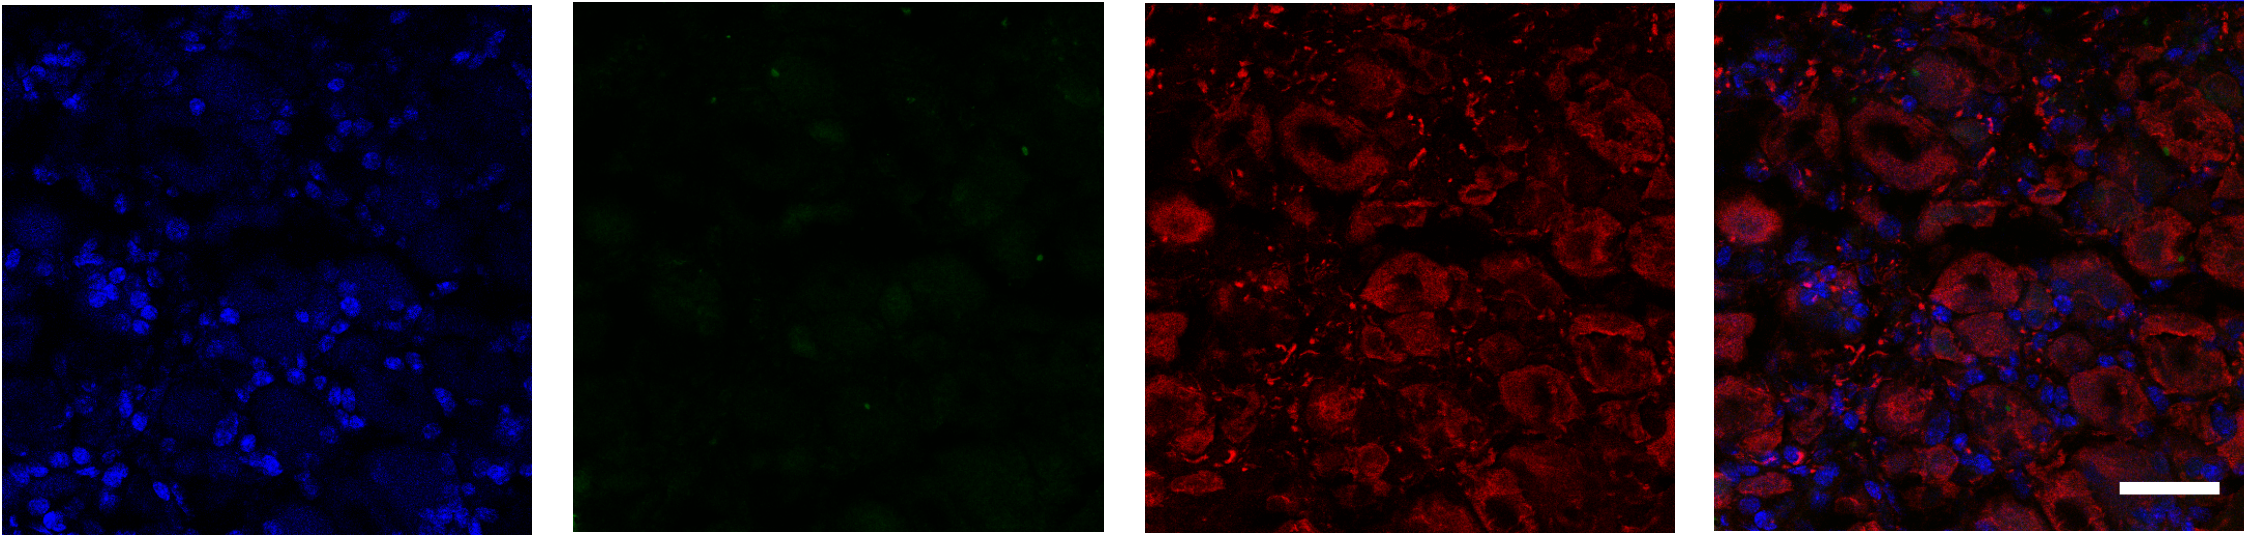

C57BL/6J PSNL

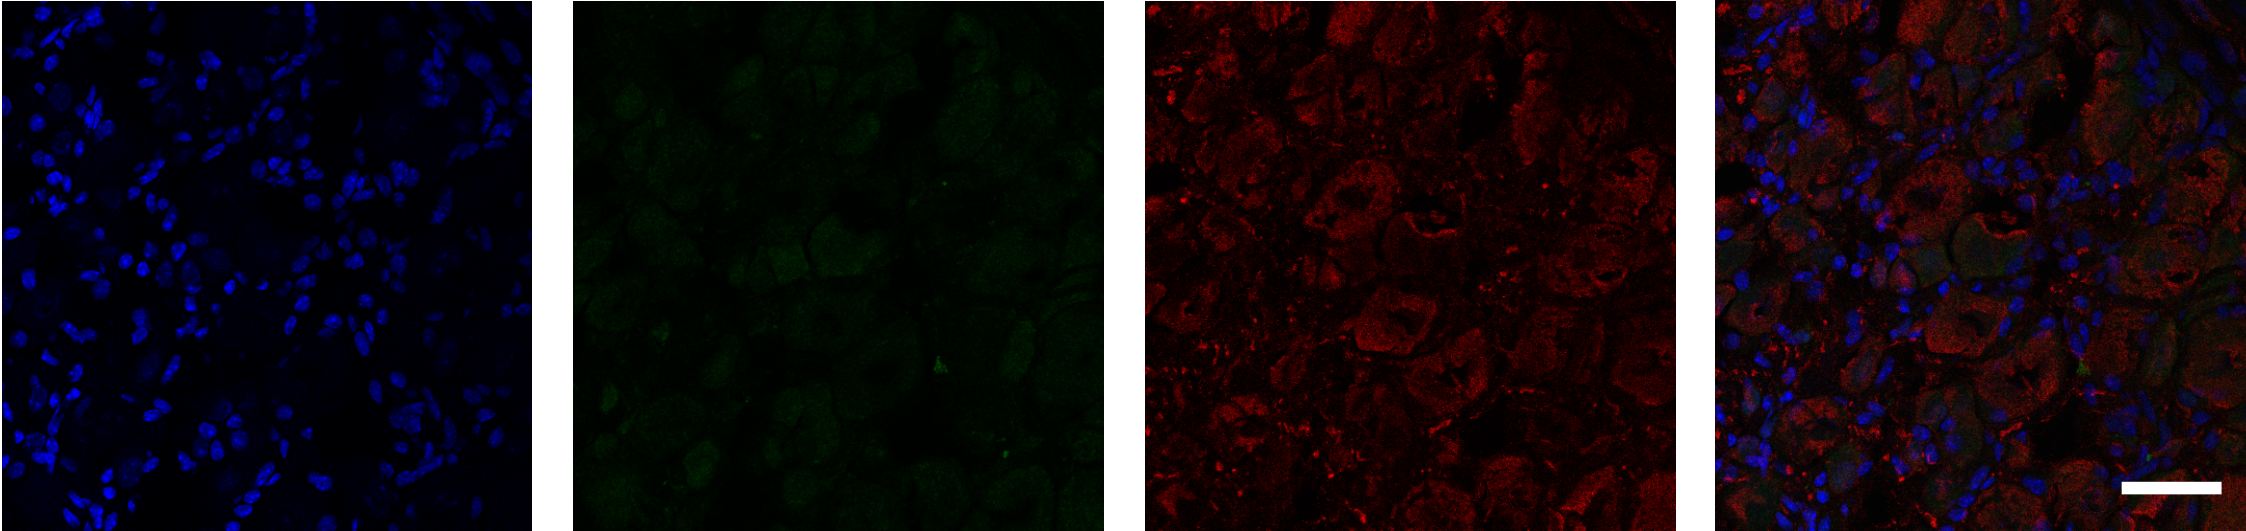

CB2-GFP SHAM

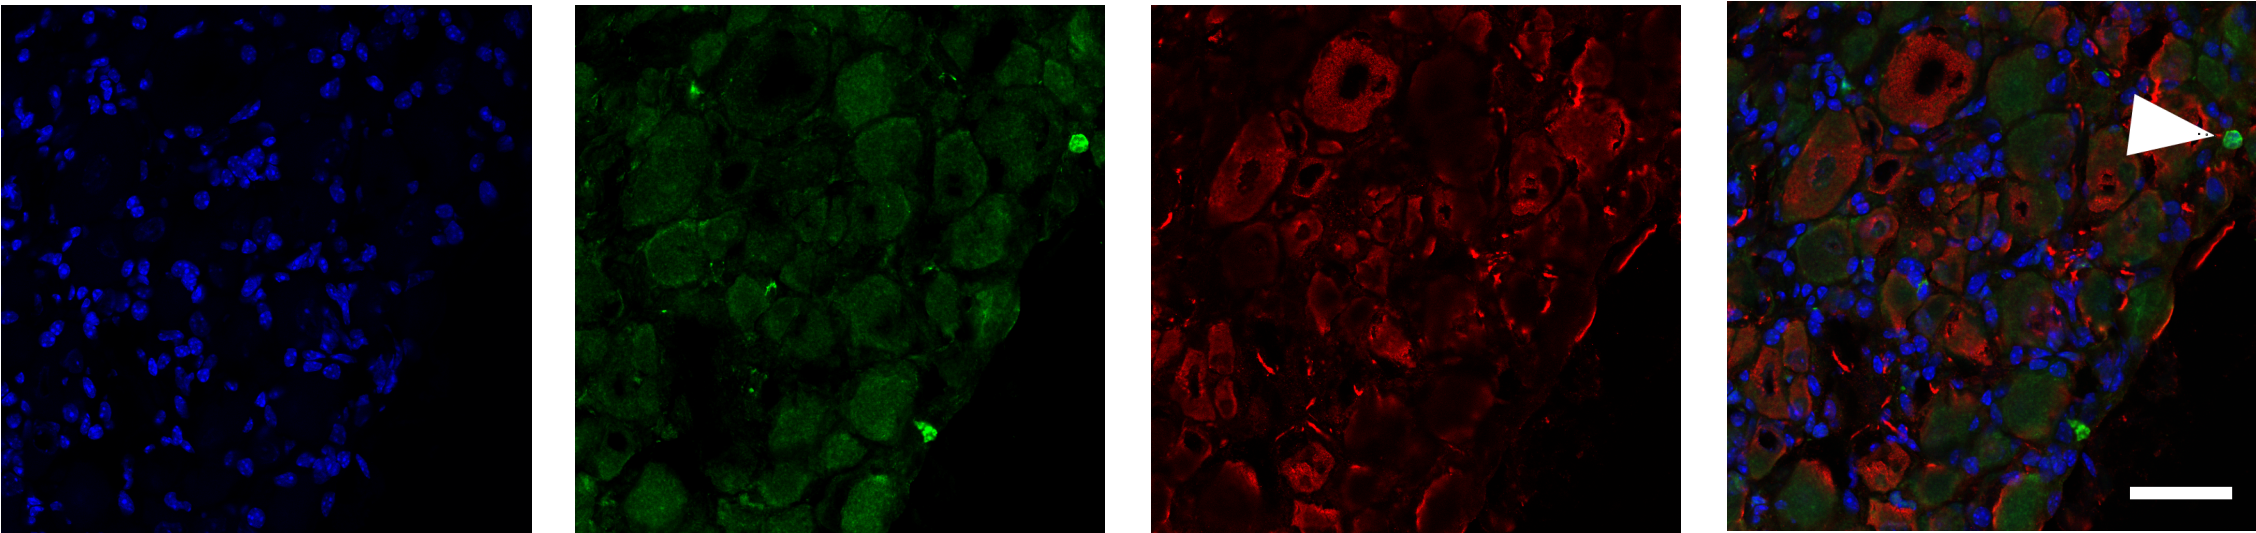

CB2-GFP PSNL

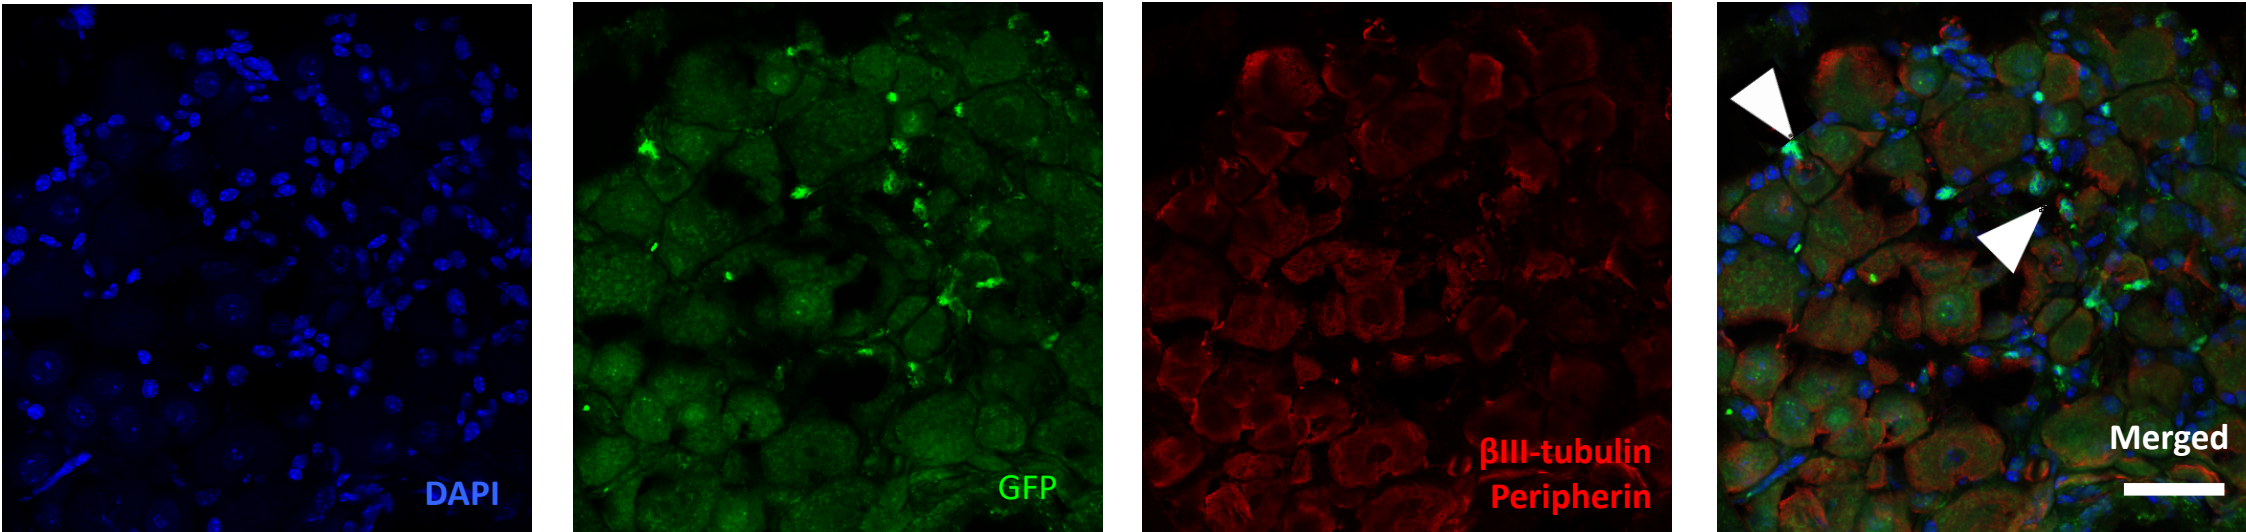

DAPI

GFP

$\beta$ III-tubulin  
Peripherin

Merged
