# Supplementary material for: Protective role of neuronal and lymphoid cannabinoid CB2 receptors in neuropathic pain
Source: eLife journal article supplement (doi:10.7554/elife.55582), 2020-07-20

Figure 2-figure supplement 2

A

Von Frey - JWH133 5 - 10 mg/kg i.p.  
Ipsilateral paw

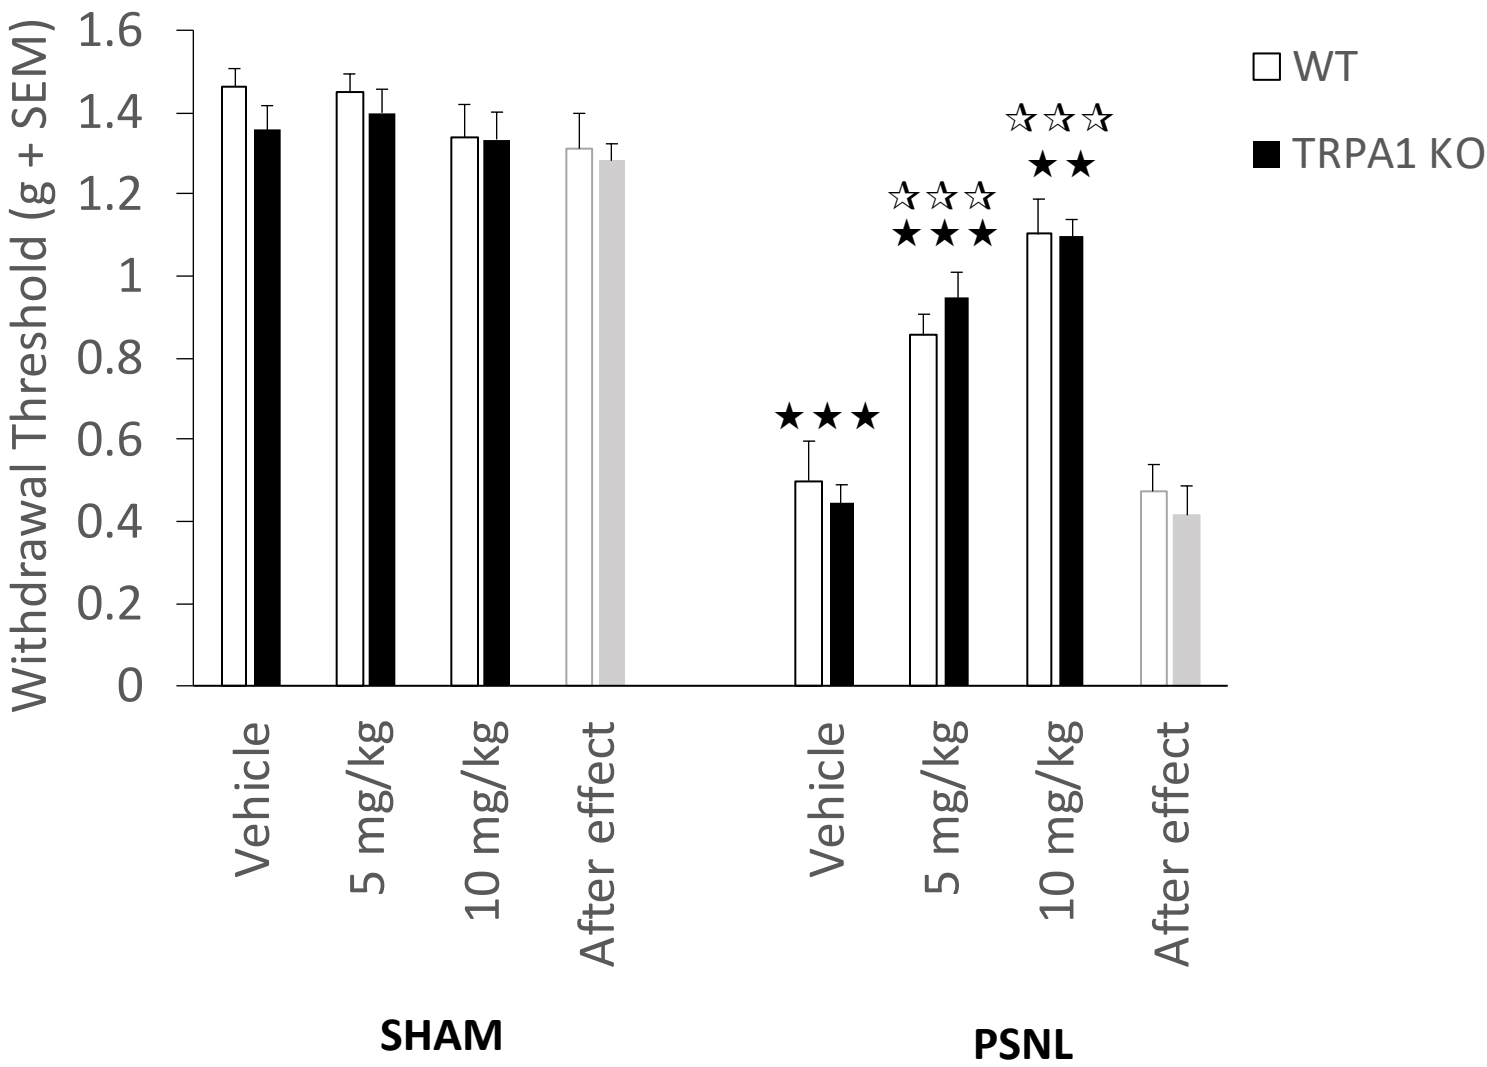

B

Plantar- JWH133 5 - 10 mg/kg i.p.  
Ipsilateral paw

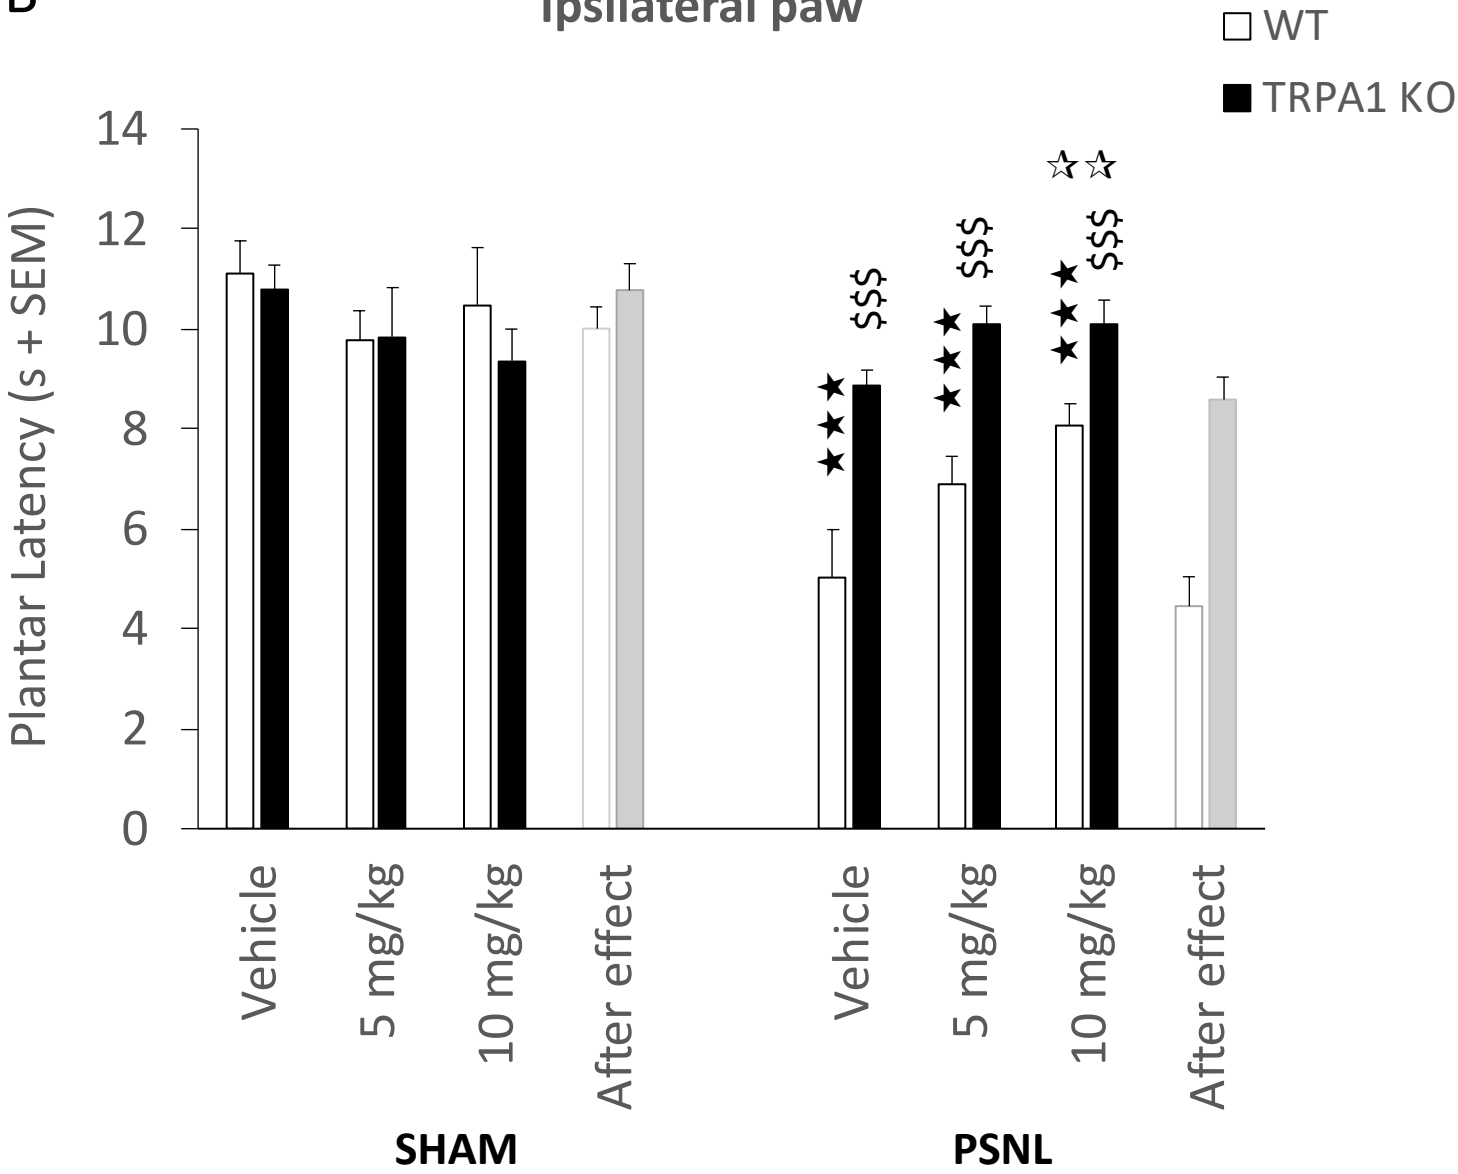

Supplement: supp [file elife-55582-supp-v1.zip]
