# Supplementary material for: Protective role of neuronal and lymphoid cannabinoid CB2 receptors in neuropathic pain
Source: eLife journal article supplement (doi:10.7554/elife.55582), 2020-07-20
Supplement: supp [file elife-55582-supp-v1.zip]

# Figure 4-figure supplement 7

## Tyramide Signal Amplification

Without TSA

With TSA

C57BL/6J

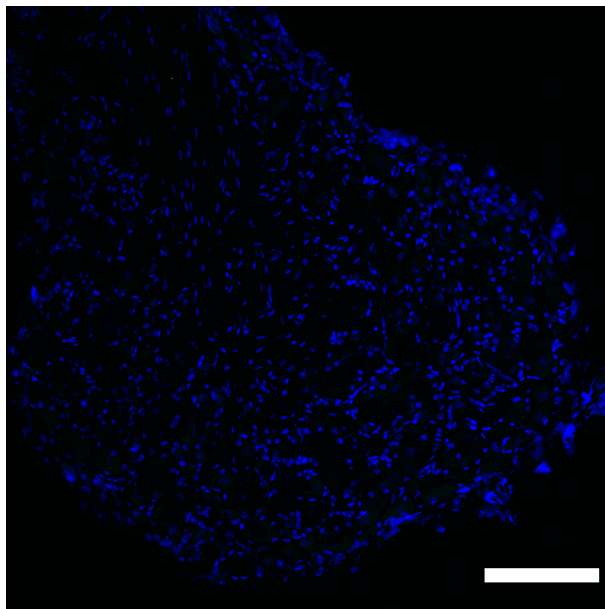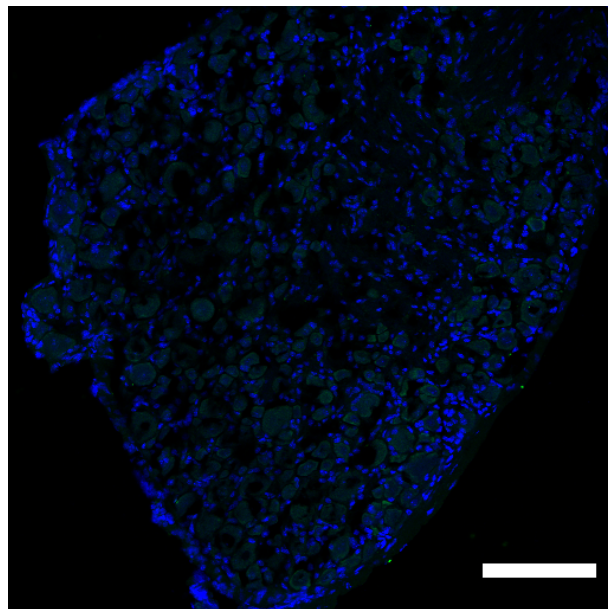

CB2-GFP

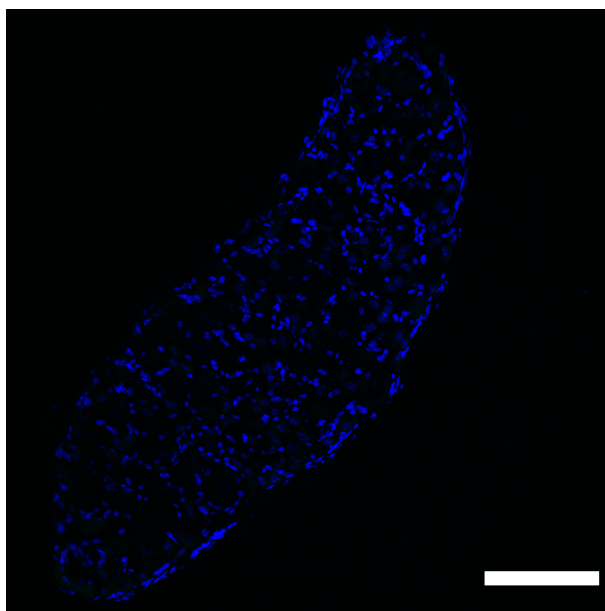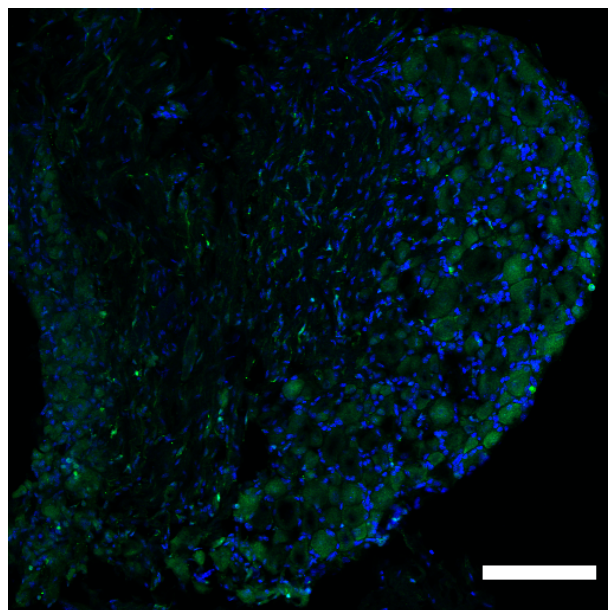

DAPI / GFP
