# Supplementary material for: Protective role of neuronal and lymphoid cannabinoid CB2 receptors in neuropathic pain
Source: eLife journal article supplement (doi:10.7554/elife.55582), 2020-07-20
Supplement: supp [file elife-55582-supp-v1.zip]

Archive with 27 entries (27 files):
- elife_poa_e55582_Figure_1_figure_supplement_1.pdf
- elife_poa_e55582_Figure_2_figure_supplement_1.pdf
- elife_poa_e55582_Figure_2_figure_supplement_2.pdf
- elife_poa_e55582_Figure_3_figure_supplement_1.pdf
- elife_poa_e55582_Figure_3_figure_supplement_2.pdf
- elife_poa_e55582_Figure_4_figure_supplement_1.pdf
- elife_poa_e55582_Figure_4_figure_supplement_2.pdf
- elife_poa_e55582_Figure_4_figure_supplement_3.pdf
- elife_poa_e55582_Figure_4_figure_supplement_4.pdf
- elife_poa_e55582_Figure_4_figure_supplement_5.pdf
- elife_poa_e55582_Figure_4_figure_supplement_6.pdf
- elife_poa_e55582_Figure_4_figure_supplement_7.pdf
- elife_poa_e55582_Figure_4_figure_supplement_8.pdf
- elife_poa_e55582_Figure_5_figure_supplement_1.pdf
- elife_poa_e55582_Transparent_Reporting_File.pdf
- elife_poa_e55582_Figure_1_source_data_1.xlsx
- elife_poa_e55582_Figure_2_source_data_1.xlsx
- elife_poa_e55582_Figure_3_source_data_1.xlsx
- elife_poa_e55582_Figure_4_source_data_1.xlsx
- elife_poa_e55582_Figure_5_source_data_1.xlsx
- elife_poa_e55582_Figure_1_figure_supplement_1_source_data_1.xlsx
- elife_poa_e55582_Figure_2_figure_supplement_1_source_data_1.xlsx
- elife_poa_e55582_Figure_2_figure_supplement_2_source_data_1.xlsx
- elife_poa_e55582_Figure_3_figure_supplement_1_source_data_1.xlsx
- elife_poa_e55582_Figure_3_figure_supplement_2_source_data_1.xlsx
- elife_poa_e55582_Figure_4_figure_supplement_1_source_data_1.xlsx
- elife_poa_e55582_Figure_5_figure_supplement_1_source_data_1.xlsx
