# Supplementary material for: Protective role of neuronal and lymphoid cannabinoid CB2 receptors in neuropathic pain
Source: eLife journal article supplement (doi:10.7554/elife.55582), 2020-07-20
Supplement: supp [file elife-55582-supp-v1.zip › elife_poa_e55582_Figure_1_figure_supplement_1_source_data_1.xlsx]

## Sheet: Figure 1-figure suppl1_RawData
		SelfAdmin	Von Frey	Plantar	Plus Maze
		N	N	N	N
Sham	Vehicle	8	8	7	6
PSNL	Vehicle	10	7	8	8
Sham	JWH 0.15	7	7	7	5
PSNL	JWH 0.15	7	5	5	5
Sham	JWH 0.3	7	6	7	7
PSNL	JWH 0.3	9	9	9	9
									Figure 1-figure supplement 1A																												Figure 1-figure supplement 1B
									Drug Selfadministration																												Food Selfadministration
									Active JWH133													Inactive JWH133															Active Food						Inactive Food
							Surgery	Treatment	day1	day2	day3	day4	day5	day6	day7	day8	day9	day10	day11	day12		day1	day2	day3	day4	day5	day6	day7	day8	day9	day10	day11	day12		Genotype	Mouse	day1	day2	day3	day4	day5		day1	day2	day3	day4	day5
							Sham	Vehicle	21	14	2	7	6	9	1	2	3	3	3	8		1	0	5	0	0	0	0	1	2	0	0	3		C57BL/6J	16	27	36	55	43	85		25	2	3	2	4
							Sham	Vehicle	49	26	17	19	20	17	8	11	12	9	7	17		12	1	1	5	3	1	2	1	1	3	0	3		C57BL/6J	26	24	23	40	48	50		14	3	4	1	3
							Sham	Vehicle	7	2	5	3	0	1	3	0	2	0	0	0		0	0	4	0	2	2	2	4	1	0	0	0		C57BL/6J	42	13	2	2	1	2		18	2	0	1	2
							Sham	Vehicle	12	12	9	9	4	6	5	4	4	4	4	3		6	5	2	0	0	1	0	1	1	1	2	1		C57BL/6J	49	23	24	64	79	92		10	5	5	2	8
							Sham	Vehicle	28	1	8	1	1	7	1	0	0	0	0	1		3	1	4	1	2	5	2	1	1	1	1	1		C57BL/6J	92	31	43	56	49	61		15	6	11	16	12
							Sham	Vehicle	12	9	7	0	1	3	1	1	1	3	2	0		1	9	2	0	3	0	0	3	1	7	0	0		C57BL/6J	132	34	39	78	76	82		28	3	5	5	12
							Sham	Vehicle	24	10	13	18	12	20	11	14	19	19	10	13		10	7	7	8	6	13	7	3	5	5	2	5		C57BL/6J	137	30	35	69	66	67		30	11	11	16	10
							Sham	Vehicle	15	12	9	6	6	10	18	8	4	3	3	2		2	6	5	5	2	1	6	3	2	1	1	1		C57BL/6J	73	27	28	46	84	87		22	8	4	8	20
							PSNL	Vehicle	11	8	13	15	14	7	6	11	7	4	1	3		1	5	2	1	1	0	0	1	0	1	0	0		C57BL/6J	31	31	21	40	23	44		15	4	4	2	3
							PSNL	Vehicle	29	6	8	12	14	11	13	10	8	7	6	4		1	0	0	3	3	3	1	1	6	2	2	0		C57BL/6J	34	59	93	100	100	100		21	11	0	1	3
							PSNL	Vehicle	12	10	7	13	17	12	6	4	3	3	3	1		3	4	1	8	7	3	1	1	6	4	2	3		C57BL/6J	57	25	37	48	48	68		12	2	7	11	9
							PSNL	Vehicle	13	17	9	8	4	3	6	1	1	1	0	1		12	9	2	6	0	5	9	3	0	1	0	2		C57BL/6J	59	31	41	46	76	84		13	8	8	2	1
							PSNL	Vehicle	10	8	5	6	7	2	2	5	1	1	3	8		0	0	0	1	0	0	0	0	0	0	1	0		C57BL/6J	64	10	31	31	41	37		14	2	3	0	0
							PSNL	Vehicle	4	3	3	2	3	3	2	2	1	3	5	2		3	2	6	4	5	3	3	5	1	9	3	7		C57BL/6J	107	17	32	37	42	41		25	3	9	6	6
							PSNL	Vehicle	8	14	14	6	5	6	4	3	4	4	1	4		0	1	1	0	3	2	3	1	0	5	1	0		C57BL/6J	114	34	33	21	52	91		14	7	4	6	3
							PSNL	Vehicle	19	14	16	13	24	18	31	19	15	7	9	17		1	2	3	0	7	2	5	6	1	0	0	2		C57BL/6J	144	54	37	37	41	40		12	5	3	13	5
							PSNL	Vehicle	7	13	6	9	0	2	6	7	7	3	3	1		2	5	4	1	2	5	3	4	4	1	3	2		C57BL/6J	147	32	35	33	41	30		11	6	5	10	9
							PSNL	Vehicle	9	16	10	10	7	8	2	10	10	18	9	8		0	2	5	0	7	7	8	4	2	5	3	0		C57BL/6J	70	59	39	700	90	100		25	7	4	1	1
							Sham	JWH 0.15	14	3	4	8	12	7	4	3	5	5	1	2		0	1	0	0	1	0	0	0	1	1	0	0		C57BL/6J	18	32	35	34	30	23		13	8	3	4	3
							Sham	JWH 0.15	1	5	7	18	10	5	5	4	5	1	0	2		0	0	0	3	2	0	1	0	1	1	0	3		C57BL/6J	45	16	21	24	38	72		9	8	2	2	3
							Sham	JWH 0.15	11	19	16	8	6	14	7	6	3	5	4	3		5	3	5	2	5	1	3	2	0	1	0	0		C57BL/6J	47	33	19	56	76	89		22	4	12	7	10
							Sham	JWH 0.15	38	49	15	26	21	20	20	13	7	13	18	8		4	10	1	4	6	6	1	0	0	2	1	1		C57BL/6J	48	11	38	55	69	81		14	11	7	13	8
							Sham	JWH 0.15	6	8	6	2	1	2	1	1	3	10	5	4		7	16	13	9	5	8	6	8	0	7	7	5		C57BL/6J	65	21	38	53	48	44		15	8	0	2	2
							Sham	JWH 0.15	39	17	21	21	18	4	11	11	7	6	5	6		1	0	0	2	2	0	0	0	2	0	0	0		C57BL/6J	96	23	37	33	32	37		6	6	4	2	5
							Sham	JWH 0.15	3	5	9	2	3	4	4	2	1	1	1	1		0	0	7	1	5	0	0	0	1	0	1	1		C57BL/6J	141	28	47	61	54	48		8	14	13	10	7
							PSNL	JWH 0.15	29	30	20	20	7	17	15	12	8	8	4	6		0	3	1	1	1	0	0	1	0	2	0	0		C57BL/6J	8	33	33	44	46	38		19	3	8	8	5
							PSNL	JWH 0.15	14	14	8	5	13	3	2	6	2	2	0	0		31	19	17	5	5	18	7	4	5	2	0	0		C57BL/6J	58	32	40	53	66	83		10	17	8	5	25
							PSNL	JWH 0.15	31	25	25	21	20	8	0	0	3	3	3	2		9	3	0	8	6	0	0	1	2	0	0	7		C57BL/6J	124	23	12	47	71	61		21	8	12	5	12
							PSNL	JWH 0.15	22	12	7	5	1	8	8	5	9	10	5	5		9	1	0	3	0	0	1	1	1	2	0	2		C57BL/6J	126	27	22	25	24	49		10	6	15	8	12
							PSNL	JWH 0.15	17	14	5	8	4	3	3	4	3	2	1	6		0	3	1	5	1	3	1	0	0	0	2	2		C57BL/6J	60	40	44	53	44	36		18	8	10	4	1
							PSNL	JWH 0.15	5		8	0	0	2	4	4	1	1	2	0		5	4	5	0	1	2	3	5	2	1	0	0		C57BL/6J	101	20	19	33	27	31		15	5	3	5	6
							PSNL	JWH 0.15	27	21	26	12	16	9	11	9	13	4	1	8		1		0	0	0	1	0	1	0	1	0	0		C57BL/6J	146	27	34	33	35	49		11	1	1	0	8
							Sham	JWH 0.3	5	3	2	4	4	6	5	4	3	9	4	1		1	0	0	0	0	0	0	0	0	0	0	1		C57BL/6J	6	42	32	46	47	48		9	3	1	3	2
							Sham	JWH 0.3	25	36	31	23	9	19	10	13	13	6	1	1		3	2	0	7	2	0	2	1	0	2	1	0		C57BL/6J	25	49	56	100	61	82		14	3	6	12	15
							Sham	JWH 0.3	18	5	6	2	10	13	10	5	8	7	5	1		4	1	0	0	1	2	1	0	0	0	0	1		C57BL/6J	106	23	23	33	57	60		17	5	2	2	3
							Sham	JWH 0.3		7	2	0	1	0	0	1	1	2	4	4			2	3	0	1	0	4	1	0	2	1	0		C57BL/6J	115	37	41	32	43	26		25	6	5	11	11
							Sham	JWH 0.3	6	5	4	21	2	1	1	6	2	4	1	3		3	7	0	4	13	7	3	7	3	1	3	1		C57BL/6J	127	13	8	19	17	36		17	7	3	3	3
							Sham	JWH 0.3	24	18	14	15	9	8	7	4	1	3	2	1		3	3	4	3	2	3	1	1	2	1	2	1		C57BL/6J	145	29	17	18	25	37		20	10	5	6	4
							Sham	JWH 0.3	1	1	8	2	3	9	5	2	9	1	1	2		0	0	0	0	0	1	0	2	3	0	0	1		C57BL/6J	40	7	1	28	67	72		10	1	11	4	6
							PSNL	JWH 0.3	16	15	22	14	25	19	28	23	14	9	14	8		1	4	3	9	2	2	2	4	1	1	8	1		C57BL/6J	10	43	8	43	59	62		12	2	5	4	7
							PSNL	JWH 0.3	17	14	11	4	25	8	6	25	16	11	0	2		0	2	3	0	1	0	1	1	0	0	0	0		C57BL/6J	36	27	46	45	37	55		6	2	8	6	3
							PSNL	JWH 0.3	33	43	32	25	21	15	13	14	11	19	9	5		4	3	3	1	0	0	0	2	0	0	0	0		C57BL/6J	54	41	23	30	52	66		10	11	2	6	2
							PSNL	JWH 0.3	12	11	3	5	4	2	5	7	10	12	15	16		30	8	3	5	10	3	4	1	6	8	3	6		C57BL/6J	78	34	11	23	24	41		27	2	2	4	7
							PSNL	JWH 0.3	16	26	17	32	26	17	11	10	6	12	18	6		1	1	3	4	6	2	1	2	1	1	2	0		C57BL/6J	84	34	33	27	37	40		2	10	5	4	6
							PSNL	JWH 0.3	12	5	10	10	11	9	8	4	10	3	4	3		2	0	2	1	2	4	4	1	2	0	1	1		C57BL/6J	112	37	60	69	94	61		26	19	9	12	5
							PSNL	JWH 0.3	13	27	15	6	3	5	2	2	5	3	3	4		2	6	12	1	5	0	0	0	0	1	0	0		C57BL/6J	130	30	50	53	45	55		29	11	8	15	6
							PSNL	JWH 0.3	23	9	8	4	4	14	11	2	3	6	9	8		0	0	1	1	0	1	4	1	5	0	3	2		C57BL/6J	149	30	30	24	23	21		6	7	2	0	1
							PSNL	JWH 0.3	5	18	18	9	9	13	26	17	16	24	30	22		2	0	1	0	0	0	1	0	1	4	0	0		C57BL/6J	138	21	19	46	40	38		19	4	3	3	5
						Sham	Vehicle	Average	21	10.75	8.75	7.875	6.25	9.125	6	5	5.625	5.125	3.625	5.5		4.375	3.625	3.75	2.375	2.25	2.875	2.375	2.125	1.75	2.25	0.75	1.75			Average	26.125	28.75	51.25	55.75	65.75		20.25	5	5.375	6.375	8.875
								SD	13.288	7.75979	4.62138	7.21976	6.77706	6.53425	6.07101	5.37188	6.52331	6.26641	3.42	6.48074		4.50198	3.5431	1.98206	3.15945	1.90863	4.38952	2.72226	1.24642	1.38873	2.54951	0.886405	1.75255			SD	6.42401	12.9367	23.3284	27.0436	29.5478		7.14643	3.20713	3.81491	6.39056	5.98659
								N	8	8	8	8	8	8	8	8	8	8	8	8		8	8	8	8	8	8	8	8	8	8	8	8			N	8	8	8	8	8		8	8	8	8	8
								SEM	4.69802	2.7435	1.6339	2.55257	2.39605	2.31021	2.14643	1.89925	2.30634	2.21551	1.20915	2.29129		1.59169	1.25268	0.700765	1.11704	0.674802	1.55193	0.962465	0.440677	0.49099	0.901388	0.313392	0.61962			SEM	2.27123	4.5738	8.24784	9.56136	10.4467		2.52664	1.13389	1.34878	2.2594	2.11658
						PSNL	Vehicle	Average	12.2	10.9	9.1	9.4	9.5	7.2	7.8	7.2	5.7	5.1	4	4.9		2.3	3	2.4	2.4	3.5	3	3.3	2.6	2	2.8	1.5	1.6			Average	23.4286	33.5714	45.1429	49.5714	56.2857		12.4286	8.42857	5.85714	5.71429	5.42857
								SD	7.13053	4.60555	4.17532	4.00555	7.47217	5.22388	8.77876	5.45283	4.59589	4.97661	3.19722	4.99889		3.59166	2.78887	2.06559	2.79682	2.83823	2.21108	3.16403	2.06559	2.44949	2.89828	1.2693	2.22111			SD	8.18244	10.0309	14.4156	17.9058	24.588		5.38074	3.25869	5.01427	4.42396	2.99205
								N	10	10	10	10	10	10	10	10	10	10	10	10		10	10	10	10	10	10	10	10	10	10	10	10			N	7	7	7	7	7		7	7	7	7	7
								SEM	2.25487	1.4564	1.32035	1.26667	2.36291	1.65193	2.77609	1.72434	1.45335	1.57374	1.01105	1.58079		1.13578	0.881917	0.653197	0.884433	0.897527	0.699206	1.00056	0.653197	0.774597	0.916515	0.401386	0.702377			SEM	3.09267	3.79133	5.44858	6.76777	9.2934		2.03373	1.23167	1.89521	1.6721	1.13089
						Sham	JWH 0.15	Average	16	15.1429	11.1429	12.1429	10.1429	8	7.42857	5.71429	4.42857	5.85714	4.85714	3.71429		2.42857	4.28571	3.71429	3	3.71429	2.14286	1.57143	1.42857	0.714286	1.71429	1.28571	1.42857			Average	28.5714	25.4286	39.4286	45.2857	51.5714		16	5	4.71429	5.85714	6.28571
								SD	16	16.1702	6.25643	9.5294	7.47058	6.55744	6.3471	4.60848	2.22539	4.41318	6.14894	2.49762		2.87849	6.29058	4.95696	2.94392	1.97605	3.38765	2.22539	2.99205	0.755929	2.42997	2.56348	1.90238			SD	6.71884	11.725	10.9305	18.1816	17.8499		4.59814	5.1455	4.8795	2.70801	7.73366
								N	7	7	7	7	7	7	7	7	7	7	7	7		7	7	7	7	7	7	7	7	7	7	7	7			N	7	7	7	7	7		7	7	7	7	7
								SEM	6.04743	6.11177	2.36471	3.60178	2.82361	2.47848	2.39898	1.74184	0.84112	1.66803	2.32408	0.944011		1.08797	2.37762	1.87355	1.1127	0.746876	1.28041	0.84112	1.13089	0.285714	0.918443	0.968904	0.719032			SEM	2.53948	4.43164	4.13135	6.87201	6.74663		1.73793	1.94482	1.84428	1.02353	2.92305
						PSNL	JWH 0.15	Average	20.7143	19.3333	14.1429	10.1429	8.71429	7.14286	6.14286	5.71429	5.57143	4.28571	2.28571	3.85714		7.85714	5.5	3.42857	3.14286	2	3.42857	1.71429	1.85714	1.42857	1.14286	0.285714	1.57143			Average	35.2	39.9	109.3	55.4	63.5		16.2	5.5	4.7	5.2	4
								SD	9.32227	7.20185	9.15475	7.94625	7.73982	5.20988	5.39841	3.86067	4.46681	3.40168	1.79947	3.18479		10.9305	6.68581	6.24118	3.02372	2.44949	6.52833	2.56348	1.86445	1.81265	0.899735	0.755929	2.57275			SD	17.0085	19.4619	208.642	24.7844	28.1356		5.39135	2.87711	2.66875	4.73286	3.19722
								N	7	6	7	7	7	7	7	7	7	7	7	7		7	6	7	7	7	7	7	7	7	7	7	7			N	10	10	10	10	10		10	10	10	10	10
								SEM	3.52349	2.94014	3.46017	3.0034	2.92538	1.96915	2.04041	1.4592	1.6883	1.28571	0.680136	1.20374		4.13135	2.72947	2.35895	1.14286	0.92582	2.46748	0.968904	0.704698	0.685119	0.340068	0.285714	0.972408			SEM	5.37856	6.1544	65.9785	7.83752	8.89725		1.70489	0.909823	0.843933	1.49666	1.01105
						Sham	JWH 0.3	Average	13.1667	10.7143	9.57143	9.57143	5.42857	8	5.42857	5	5.28571	4.57143	2.57143	1.85714		2.33333	2.14286	1	2	2.71429	1.85714	1.57143	1.71429	1.14286	0.857143	1	0.714286			Average	28.8571	29.1429	41.1429	44.7143	49.5714		14.8571	6.85714	8.14286	5	9.85714
								SD	9.32227	7.20185	9.15475	7.94625	7.73982	5.20988	5.39841	3.86067	4.46681	3.40168	1.79947	3.18479		10.9305	6.68581	6.24118	3.02372	2.44949	6.52833	2.56348	1.86445	1.81265	0.899735	0.755929	2.57275			SD	6.71884	11.725	10.9305	18.1816	17.8499		4.59814	5.1455	4.8795	2.70801	7.73366
								N	7	6	7	7	7	7	7	7	7	7	7	7		7	6	7	7	7	7	7	7	7	7	7	7			N	7	7	7	7	7		7	7	7	7	7
								SEM	3.52349	2.94014	3.46017	3.0034	2.92538	1.96915	2.04041	1.4592	1.6883	1.28571	0.680136	1.20374		4.13135	2.72947	2.35895	1.14286	0.92582	2.46748	0.968904	0.704698	0.685119	0.340068	0.285714	0.972408			SEM	2.53948	4.43164	4.13135	6.87201	6.74663		1.73793	1.94482	1.84428	1.02353	2.92305
						PSNL	JWH 0.3	Average	16.3333	18.6667	15.1111	12.1111	14.2222	11.3333	12.2222	11.5556	10.1111	11	11.3333	8.22222		4.66667	2.66667	3.44444	2.44444	2.88889	1.33333	1.88889	1.33333	1.77778	1.66667	1.88889	1.11111			Average	33	31.1111	40	45.6667	48.7778		15.2222	7.55556	4.88889	6	4.66667
								SD	7.90569	11.6726	8.5505	9.99305	9.93451	5.67891	9.05232	8.73372	4.72875	7	9.19239	6.61018		9.57862	2.87228	3.32081	3.00463	3.444	1.5	1.69148	1.22474	2.22361	2.69258	2.61937	1.96497			SD	6.89202	17.9196	15.3867	21.5639	14.678		10.2564	5.76869	2.848	4.66369	2.17945
								N	9	9	9	9	9	9	9	9	9	9	9	9		9	9	9	9	9	9	9	9	9	9	9	9			N	9	9	9	9	9		9	9	9	9	9
								SEM	2.63523	3.89087	2.85017	3.33102	3.3115	1.89297	3.01744	2.91124	1.57625	2.33333	3.06413	2.20339		3.19287	0.957427	1.10694	1.00154	1.148	0.5	0.563827	0.408248	0.741204	0.897527	0.873124	0.65499			SEM	2.29734	5.97319	5.12889	7.18795	4.89268		3.41881	1.9229	0.949334	1.55456	0.726483

## Sheet: Figure1-figure suppl1_Stats
Figure 1-figure supplement 1A
	JWH 0.3 mg/kg/inf
	Mixed Model Analysis
	Fixed Effects
	Type III Tests of Fixed Effectsa
	Source	Numerator df	Denominator df	F	Sig.
	Surgery	1	123.931	22.7818	5.01748e-06
	Day	11	30.1762	2.84687	0.0111675
	Surgery * Day	11	30.1762	0.37841	0.954622
	a. Dependent Variable: Active.
	Pairwise Comparisonsa
	(I) Surgery		Mean Difference (I-J)	Std. Error	df	Sig.c	95% Confidence Interval for Differencec
							Lower Bound	Upper Bound
	Sham	PSNL	-5.403*	1.13189	123.931	5.01748e-06	-7.64292	-3.16222
	PSNL	Sham	5.403*	1.13189	123.931	5.01748e-06	3.16222	7.64292
	Based on estimated marginal means
	*. The mean difference is significant at the .05 level.
	a. Dependent Variable: Active.
	c. Adjustment for multiple comparisons: Bonferroni.
