# Supplementary material for: Protective role of neuronal and lymphoid cannabinoid CB2 receptors in neuropathic pain
Source: eLife journal article supplement (doi:10.7554/elife.55582), 2020-07-20
Supplement: supp [file elife-55582-supp-v1.zip › elife_poa_e55582_Figure_1_source_data_1.xlsx]

## Sheet: Figure1_RawData
		SelfAdmin	Von Frey	Plantar	Plus Maze
		N	N	N	N
Sham	Vehicle	8	8	7	6
PSNL	Vehicle	10	7	8	8
Sham	JWH 0.15	7	7	7	5
PSNL	JWH 0.15	7	5	5	5
Sham	JWH 0.3	7	6	7	7
PSNL	JWH 0.3	9	9	9	9
									Figure 1B															Figure 1C																		Figure 1D
									JWH133 Self-administration															Von Frey test									Plantar test									Elevated Plus Maze
									Active Session Responding			Overall		Inactive Session Responding			Overall		Discrimination Index			Overall		VF IPSI				VF CONTRA					PT IPSI				PT CONTRA
					Genotype	Mouse	Surgery	Treatment	day10	day11	day12	AUC LAST 3 days ACTIVE		day10	day11	day12	AUC LAST 3 days INACTIVE		day10	day11	day12	AUC LAST 3 days DI		Day-1	Day3	Day6	Day18	Day-1	Day3	Day6	Day18		Day-1	Day3	Day6	Day18	Day-1	Day3	Day6	Day18		% Entries Open Arms
					C57BL/6J	16	Sham	Vehicle	3	3	8	8.5		0	0	3	1.5		1	1	0.454545	1.72727		1.513	1.513	1.513	1.513	1.513	1.513	1.513	1.513		12.04	10.84	10.39	9.47	12.41	11.06	12.29	10.18
					C57BL/6J	26	Sham	Vehicle	9	7	17	20		3	0	3	3		0.5	1	0.7	1.6		1.137	1.513	1.513	1.513	1.137	1.513	1.513	1.513		10.74	9.4	11.19	11.01	10.07	9.4	10.16			36
					C57BL/6J	42	Sham	Vehicle	0	0	0	0		0	0	0	0							1.513	1.513	1.513	1.513	1.513	1.513	1.513	1.513			11.4	9.96	8.62		10.41	10.33	9.36		36.6667
					C57BL/6J	49	Sham	Vehicle	4	4	3	7.5		1	2	1	3		0.6	0.333333	0.5	0.883333		1.513	1.513	1.513	1.513	1.513	1.392	1.513	1.513		11.18	9.45	10.86	9.05	12.01	9.08	10.22	10.94
					C57BL/6J	92	Sham	Vehicle	0	0	1	0.5		1	1	1	2		-1	-1	0	-1.5		1.513	1.513	1.137	1.502	1.513	1.086	1.513	1.086		12.16	13.1633	12.7367	11.7967	11.57	12.9133	11.6267	11.6767		35.1351
					C57BL/6J	132	Sham	Vehicle	3	2	0	3.5		7	0	0	3.5							1.513	1.392	1.513	1.513	1.241	0.933	1.086	1.513		13.3267	8.41333	8.2375	6.69	12.89	9.475	11.31	11.8867		27.2727
					C57BL/6J	137	Sham	Vehicle	19	10	13	26		5	2	5	7		0.583333	0.666667	0.444444	1.18056		1.086	1.086	0.731	1.392	1.137	0.997	1.502	1.513		11.4167	12.1733	11.7367	11.9967	11.3867	12.2833	11.98	11.7733		25.7143
					C57BL/6J	73	Sham	Vehicle	3	3	2	5.5		1	1	1	2		0.5	0.5	0.333333	0.916667		1.39	1.513	1.392	1.241	1.513	1.392	1.241	1.086											37.037
					C57BL/6J	31	PSNL	Vehicle	4	1	3	4.5		1	0	0	0.5		0.6	1	1	1.8											8.5	5.14	4.73	4.62	8.26	7.22	9.64	11.27		26.6667
					C57BL/6J	34	PSNL	Vehicle	7	6	4	11.5		2	2	0	3		0.555556	0.5	1	1.27778		1.502	0.42	0.202	0.198	1.502	1.392	1.241	1.241		11.18	3.76	4.82	4.19	13.82	8.05	10.05	10.12
					C57BL/6J	57	PSNL	Vehicle	3	3	1	5		4	2	3	5.5		-0.142857	0.2	-0.5	-0.121429		0.891	0.625	0.486	0.433	0.891	1.513	1.513	1.513		9.18	4.4	5.29	5.08	9.4	11.19	11.86	11		19.0476
					C57BL/6J	59	PSNL	Vehicle	1	0	1	1		1	0	2	1.5																									20
					C57BL/6J	64	PSNL	Vehicle	1	3	8	7.5		0	1	0	1		1	0.5	1	1.5		1.51	0.115	0.161	0.111	1.5	1.513	1.086	1.218		12.6033	7.4	5.12	6.0225	12.2767	11.3633	9.71	11.6267		29.6296
					C57BL/6J	107	PSNL	Vehicle	3	5	2	7.5		9	3	7	11		-0.5	0.25	-0.555556	-0.277778																				22.2222
					C57BL/6J	114	PSNL	Vehicle	4	1	4	5		5	1	0	3.5		-0.111111	0	1	0.444444		1.513	0.625	0.587	0.512	1.241	1.513	0.966	0.966		10.48	6.32667	4.92667	5.11667	11.3967	11.18	11.0667	9.35333		19.0476
					C57BL/6J	144	PSNL	Vehicle	7	9	17	21		0	0	2	1		1	1	0.789474	1.89474		1.513	0.198	0.625	0.341	1.513	1.086	1.513	1.086		9.76333	4.6	7.14667	5.69667	13.6333	9.70333	13.1967	11.0433		31.4286
					C57BL/6J	147	PSNL	Vehicle	3	3	1	5		1	3	2	4.5		0.5	0	-0.333333	0.0833333		1.513		0.418	0.334	1.513		1.392	1.392		7.06333	5.53667	4	4.84	9.16667	8.76	8.64667	10.79
					C57BL/6J	70	PSNL	Vehicle	18	9	8	22		5	3	0	5.5		0.565217	0.5	1	1.28261		1.24	0.51	0.198	0.42	1.39	1.513	1.264	1.513		6.33	4.26	3.95	4.69	7.29	5.74667	5	9.28		27.2727
					C57BL/6J	18	Sham	JWH 0.15	5	1	2	4.5		1	0	0	0.5		0.666667	1	1	1.83333		1.513	1.513	1.513	1.513	1.513	1.513	1.513	1.513		9.75	11.06	11.48	12.28	10.56	10.97	10.5	12.05
					C57BL/6J	45	Sham	JWH 0.15	1	0	2	1.5		1	0	3	2							1.137	1.513	1.513	1.513	1.137	1.513	1.513	1.513		9.84	9.51	11.38	13.16	12.19	10.09	9.81	10.87		33.3333
					C57BL/6J	47	Sham	JWH 0.15	5	4	3	8		1	0	0	0.5		0.666667	1	1	1.83333		1.513	1.513	1.513	1.392	1.513	1.513	1.513	1.392		9.62	8.41	10.29	10.92	10.81	10.6	9.41	12.04		25
					C57BL/6J	48	Sham	JWH 0.15	13	18	8	28.5		2	1	1	2.5		0.733333	0.894737	0.777778	1.65029		0.997	0.966	1.086	1.086	1.241	1.392	1.086	1.513		13.14	12.2567	9.53333	10.89	10.14	10.9633	10.14	12.365		30
					C57BL/6J	65	Sham	JWH 0.15	10	5	4	12		7	7	5	13		0.176471	-0.166667	-0.111111	-0.133987		1.241	1.502	1.502	1.392	1.052	1.513	1.531	0.933		14.14	11.48	9.53	12.8033	11.4267	12.28	10.04	10.6333		35.7143
					C57BL/6J	96	Sham	JWH 0.15	6	5	6	11		0	0	0	0		1	1	1	2		1.24	1.392	1.218	1.241	1.39	1.513	1.392	1.218		7.06	11.19	7.42333	8.455	7.17	10.0433	6.23667	10.26
					C57BL/6J	141	Sham	JWH 0.15	1	1	1	2		0	1	1	1.5		1	0	0	0.5		1.51	1.086	1.392	1.392	0.82	1.218		0.891		8.66	6.62	9.74333	9.94667	7.14333	7.76333	8.79667	8.92		18.5185
					C57BL/6J	8	PSNL	JWH 0.15	8	4	6	11		2	0	0	1		0.6	1	1	1.8		1.513	0.272	0.163	0.997	1.513	1.513	1.513	1.513		11.17	3.73	4.47	7.17	8.79	10.98	10.27	9.89		25
					C57BL/6J	58	PSNL	JWH 0.15	2	0	0	1		2	0	0	1							1.502	0.587	0.397	0.625	1.502	1.513	1.513	1.513		10.45	4.4	4.1	7.68	11.49	11.19	8.78	10.98
					C57BL/6J	124	PSNL	JWH 0.15	3	3	2	5.5		0	0	7	3.5		1	1	-0.555556	1.22222		1.086	0.132	0.301	0.283	1.513	1.513	1.392	1.513											29.0323
					C57BL/6J	126	PSNL	JWH 0.15	10	5	5	12.5		2	0	2	2		0.666667	1	0.428571	1.54762		1.086	0.202	0.301	0.731	1.502	1.513	1.502	1.241		12.2133	4.78667	5.29	11.39	11.5667	9.87	10.12	11.7867		31.5789
					C57BL/6J	60	PSNL	JWH 0.15	2	1	6	5		0	2	2	3		1	-0.333333	0.5	0.416667											12.151	4.83	6.29667	8.12333	11.8967	11.0333	11.4233	12.9933		26.6667
					C57BL/6J	101	PSNL	JWH 0.15	1	2	0	2.5		1	0	0	0.5							1.513	0.272	0.42	0.731	1.513	1.392	0.864	1.513		12.2267	5.25333	12.605	10.42	11.6767	11.73	13.21	11.2133		35.7143
					C57BL/6J	146	PSNL	JWH 0.15	4	1	8	7		1	0	0	0.5		0.6	1	1	1.8
					C57BL/6J	6	Sham	JWH 0.3	9	4	1	9		0	0	1	0.5		1	1	0	1.5		1.502	1.513	1.513	1.502	1.502	1.513	1.513	1.502		9.24	1.513	8.97	12.02	8.88	1.513	9.1	12.74		33.3333
					C57BL/6J	25	Sham	JWH 0.3	6	1	1	4.5		2	1	0	2		0.5	0	1	0.75		1.513	1.392	0.891	1.513	1.513	1.513	1.392	0.997		10.7	10.45	13.24	12.26	9.66	12.18	13.49	12.11		36
					C57BL/6J	106	Sham	JWH 0.3	7	5	1	9		0	0	1	0.5		1	1	0	1.5											10.6067	6.58333	7.13333	10.8433	11.73	9.75	12.3367	12.52		26.6667
					C57BL/6J	115	Sham	JWH 0.3	2	4	4	7		2	1	0	2		0	0.6	1	1.1		1.241	1.513	1.513	1.086	1.513	1.513	1.513	1.513		10.74	11.6167		12.0667	9.57	13.2333		12.3033		36.3636
					C57BL/6J	127	Sham	JWH 0.3	4	1	3	4.5		1	3	1	4		0.6	-0.5	0.5	0.05		1.513	0.966	1.137	1.502	1.513	1.502	1.513	0.891		12.06	9.48333	12.95	11.82	11.05	11.4433	14.4667	11.1467		25
					C57BL/6J	145	Sham	JWH 0.3	3	2	1	4		1	2	1	3		0.5	0	0	0.25		1.513	1.513	1.241	0.891	1.513	1.502	1.086	1.502		11.92	12.31	13.4933	13.7233	10.9733	10.6767	10.43	12.1433		32.1429
					C57BL/6J	40	Sham	JWH 0.3	1	1	2	2.5		0	0	1	0.5		1	1	0.333333	1.66667		1.513	1.513	1.513	1.513	1.513	1.513	1.513	1.513		7.96	12.02	9.61	12.99	9.45	11.58	9.76	15.65		37.5
					C57BL/6J	10	PSNL	JWH 0.3	9	14	8	22.5		1	8	1	9		0.8	0.272727	0.777778	1.06162		1.513	0.132	0.247	0.825	1.513	1.513	1.513	1.513		9.97	6.46	4.72	6.9	10.8	12.53		9.93		38.4615
					C57BL/6J	36	PSNL	JWH 0.3	11	0	2	6.5		0	0	0	0							1.502	0.198	0.123	0.674	1.513	1.392	1.513	1.513		11.49	4.93	3.9	6.17	12.04	12.91	11.47	11.59		31.25
					C57BL/6J	54	PSNL	JWH 0.3	19	9	5	21		0	0	0	0		1	1	1	2		1.513	0.486	0.397	0.625	1.513	1.513	1.513	1.513		9.04	5	6.4	9.34	10.27	10.91	10.11	15.68		21.7391
					C57BL/6J	78	PSNL	JWH 0.3	12	15	16	29		8	3	6	10		0.2	0.666667	0.454545	0.993939		1.502	0.731	0.239	0.418	1.24	1.007	0.587	1.502		11.8033	6.34333	7.315	7.05	9.66667	11.3067	11.16	11.3633		39.4737
					C57BL/6J	84	PSNL	JWH 0.3	12	18	6	27		1	2	0	2.5		0.846154	0.8	1	1.72308		1.22	0.198	0.512	0.42	1.24	0.933	1.513	1.218		13.4067	8.0825	6.615	9.69667	15.5567	11.9767	10.8733	10.4933		43.75
					C57BL/6J	112	PSNL	JWH 0.3	3	4	3	7		0	1	1	1.5		1	0.6	0.5	1.35		1.137	0.045	0.301	0.669	1.137	1.513	1.502	1.218		10.4833	6.0375	6.77333	7.09667	12.3233	11.1167	13.13	11.2367		37.037
					C57BL/6J	130	PSNL	JWH 0.3	3	3	4	6.5		1	0	0	0.5		0.5	1	1	1.75		1.241	0.46	0.418	0.161	1.241	1.502	1.392	1.513		10.5333	6.83	4.16333	7.73667	10.7	11.35	5.93667	8.665		31.8182
					C57BL/6J	149	PSNL	JWH 0.3	6	9	8	16		0	3	2	4		1	0.5	0.6	1.3		1.513	0.397	0.891	0.731	1.513	1.513	1.531	1.513		6.05	3.245	5.71667	8.61333	7.12	8.27667	10.6	9.3		35.2941
					C57BL/6J	138	PSNL	JWH 0.3	24	30	22	53		4	0	0	2		0.714286	1	1	1.85714		1.502	0.054	0.223	1.218	1.502	1.513	1.241	1.137		5.5	7.74333	3.76	6.55667	5.34333	6.71	8.03	8.49333		32
						Average	Vehicle Sham	Average	5.125	3.625	5.5	8.9375		2.25	0.75	1.75	2.75		0.363889	0.416667	0.405387	0.801305		1.39725	1.4445	1.35312	1.4625	1.385	1.29237	1.42425	1.40625		11.8106	10.6914	10.7301	9.80476	11.7228	10.6602	11.131	10.9694		32.971
						SD		SD	6.26641	3.42	6.48074	9.32139		2.54951	0.886405	1.75255	2.0354		0.693655	0.74349	0.232043	1.17942		0.181914	0.150917	0.283615	0.0988101	0.179549	0.246363	0.166228	0.197663		0.913475	1.69456	1.42534	1.91537	0.978281	1.49574	0.890334	1.02001		5.0829
						N		N	8	8	8	8		8	8	8	8		6	6	6	6		8	8	8	8	8	8	8	8		6	7	7	7	6	7	7	6		6
						SEM		SEM	2.21551	1.20915	2.29129	3.29561		0.901388	0.313392	0.61962	0.719623		0.283184	0.303529	0.0947313	0.481498		0.0643164	0.0533573	0.100273	0.0349346	0.06348	0.0871026	0.0587704	0.0698843		0.372925	0.640483	0.53873	0.723942	0.399381	0.565337	0.336515	0.416417		2.07508
						Average	Vehicle PSNL	Average	5.1	4	4.9	9		2.8	1.5	1.6	3.7		0.385201	0.438889	0.488954	0.875966		1.38314	0.4155	0.382429	0.335571	1.36429	1.42167	1.28214	1.27557		9.3875	5.17792	4.99792	5.03198	10.6554	9.15167	9.89625	10.5604		24.4144
						SD		SD	4.97661	3.19722	4.99889	7.11805		2.89828	1.2693	2.22111	3.1728		0.522668	0.37398	0.719491	0.84767		0.239271	0.216489	0.195056	0.139725	0.231472	0.171417	0.207806	0.209198		2.08636	1.20592	0.994256	0.593402	2.47608	2.07561	2.443	0.879126		4.95028
						N		N	10	10	10	10		10	10	10	10		9	9	9	9		7	6	7	7	7	6	7	7		8	8	8	8	8	8	8	8		8
						SEM		SEM	1.57374	1.01105	1.58079	2.25093		0.916515	0.401386	0.702377	1.00333		0.174223	0.12466	0.23983	0.282557		0.0904358	0.0883813	0.0737243	0.0528109	0.0874882	0.0699808	0.0785431	0.0790692		0.737639	0.426355	0.351523	0.209799	0.875428	0.73384	0.86373	0.310818		1.75019
						Average	JWH 0.15 Sham	Average	5.85714	4.85714	3.71429	9.64286		1.71429	1.28571	1.42857	2.85714		0.70719	0.621345	0.611111	1.2805		1.30729	1.355	1.391	1.36129	1.238	1.45357	1.42467	1.28186		10.3157	10.0752	9.91143	11.2079	9.92	10.3871	9.27619	11.0198		28.5132
						SD		SD	4.41318	6.14894	2.49762	9.28132		2.42997	2.56348	1.90238	4.56175		0.302359	0.549893	0.524699	0.880412		0.208137	0.231499	0.17317	0.152269	0.256217	0.113243	0.17348	0.274154		2.48238	1.99898	1.37039	1.67624	1.99772	1.37785	1.44907	1.22949		6.88361
						N		N	7	7	7	7		7	7	7	7		6	6	6	6		7	7	7	7	7	7	6	7		7	7	7	7	7	7	7	7		5
						SEM		SEM	1.66803	2.32408	0.944011	3.50801		0.918443	0.968904	0.719032	1.72418		0.123438	0.224493	0.214207	0.359427		0.0786683	0.0874986	0.0654523	0.0575523	0.0968411	0.0428018	0.0708231	0.10362		0.93825	0.755545	0.517957	0.633558	0.755069	0.520778	0.547696	0.464705		3.07844
						Average	JWH 0.15 PSNL	Average	4.28571	2.28571	3.85714	6.35714		1.14286	0.285714	1.57143	1.64286		0.773333	0.733333	0.474603	1.3573		1.34	0.293	0.3164	0.6734	1.5086	1.4888	1.3568	1.4586		11.6422	4.6	6.55233	8.95667	11.084	10.9607	10.7607	11.3727		29.5984
						SD		SD	3.40168	1.79947	3.18479	4.20034		0.899735	0.755929	2.57275	1.21499		0.2087	0.596285	0.635625	0.576894		0.231913	0.174299	0.101532	0.257928	0.00602495	0.0541128	0.280165	0.121642		0.801715	0.572601	3.48725	1.84248	1.2915	0.678173	1.65926	1.13752		4.22456
						N		N	7	7	7	7		7	7	7	7		5	5	5	5		5	5	5	5	5	5	5	5		5	5	5	5	5	5	5	5		5
						SEM		SEM	1.28571	0.680136	1.20374	1.58758		0.340068	0.285714	0.972408	0.459221		0.0933333	0.266667	0.28426	0.257995		0.103715	0.0779487	0.0454066	0.115349	0.00269444	0.0242	0.125294	0.0544		0.358538	0.256075	1.55955	0.823983	0.577578	0.303288	0.742045	0.508716		1.88928
						Average	JWH 0.3 Sham	Average	4.57143	2.57143	1.85714	5.78571		0.857143	1	0.714286	1.78571		0.657143	0.442857	0.404762	0.97381		1.46583	1.40167	1.30133	1.3345	1.51117	1.50933	1.42167	1.31967		10.461	9.13948	10.8994	12.2462	10.1876	10.0538	11.5972	12.659		32.4295
						SD		SD	3.40168	1.79947	3.18479	4.20034		0.899735	0.755929	2.57275	1.21499		0.2087	0.596285	0.635625	0.576894		0.231913	0.174299	0.101532	0.257928	0.00602495	0.0541128	0.280165	0.121642		0.801715	0.572601	3.48725	1.84248	1.2915	0.678173	1.65926	1.13752		4.22456
						N		N	7	7	7	7		7	7	7	7		5	5	5	5		5	5	5	5	5	5	5	5		5	5	5	5	5	5	5	5		5
						SEM		SEM	1.28571	0.680136	1.20374	1.58758		0.340068	0.285714	0.972408	0.459221		0.0933333	0.266667	0.28426	0.257995		0.103715	0.0779487	0.0454066	0.115349	0.00269444	0.0242	0.125294	0.0544		0.358538	0.256075	1.55955	0.823983	0.577578	0.303288	0.742045	0.508716		1.88928
						Average	JWH 0.3 PSNL	Average	11	11.3333	8.22222	20.9444		1.66667	1.88889	1.11111	3.27778		0.757555	0.729924	0.79154	1.50447		1.40478	0.300111	0.372333	0.637889	1.37911	1.37767	1.36722	1.40444		9.80852	6.07463	5.48481	7.68444	10.4244	10.7874	10.1638	10.7502		34.536
						SD		SD	7	9.19239	6.61018	14.8649		2.69258	2.61937	1.96497	3.75925		0.284119	0.268995	0.241797	0.378046		0.15659	0.231824	0.227557	0.297047	0.159375	0.235149	0.307263	0.161821		2.59905	1.50335	1.36914	1.25421	2.96031	2.01851	2.22374	2.1767		6.32351
						N		N	9	9	9	9		9	9	9	9		8	8	8	8		9	9	9	9	9	9	9	9		9	9	9	9	9	9	8	9		9
						SEM		SEM	2.33333	3.06413	2.20339	4.95497		0.897527	0.873124	0.65499	1.25308		0.100451	0.0951042	0.0854881	0.133659		0.0521967	0.0772747	0.0758524	0.0990158	0.053125	0.0783831	0.102421	0.0539403		0.866351	0.501118	0.45638	0.418068	0.986771	0.672836	0.786212	0.725566		2.10784

## Sheet: Figure1_Stats
Figure 1B
	Session Responding
	Active
	Mixed Model Analysis
	Fixed Effects
	Type III Tests of Fixed Effectsa
	Source	Numerator df	Denominator df	F	Sig.
	Intercept	1	125.492	146.677	7.69915e-23
	Surgery	1	125.492	5.11593	0.0254276
	Treatment	2	125.492	2.96458	0.0552065
	Surgery * Treatment	2	125.492	9.64157	0.000127308
	Session	2	86.583	0.968384	0.38377
	Surgery * Session	2	86.583	0.0375883	0.963125
	Treatment * Session	4	86.583	0.556153	0.695062
	Surgery * Treatment * Session	4	86.583	0.27517	0.893273
	a. Dependent Variable: ActiveNosePokes.
	Pairwise Comparisonsa
	Surgery			Mean Difference (I-J)	Std. Error	df	Sig.c	95% Confidence Interval for Differencec
								Lower Bound	Upper Bound
	Sham	0 mg/kg/inf	0.15 mg/kg/inf	-0.0595238	1.50943	125.492	1	-3.72215	3.6031
			0.3 mg/kg/inf	1.75	1.50943	125.492	0.74551	-1.91263	5.41263
		0.15 mg/kg/inf	0 mg/kg/inf	0.0595238	1.50943	125.492	1	-3.6031	3.72215
			0.3 mg/kg/inf	1.80952	1.55893	125.492	0.743846	-1.97322	5.59227
		0.3 mg/kg/inf	0 mg/kg/inf	-1.75	1.50943	125.492	0.74551	-5.41263	1.91263
			0.15 mg/kg/inf	-1.80952	1.55893	125.492	0.743846	-5.59227	1.97322
	PSNL	0 mg/kg/inf	0.15 mg/kg/inf	1.19048	1.43726	125.492	1	-2.29704	4.67799
			0.3 mg/kg/inf	-5,519*	1.34004	125.492	0.00020628	-8.77011	-2.26692
		0.15 mg/kg/inf	0 mg/kg/inf	-1.19048	1.43726	125.492	1	-4.67799	2.29704
			0.3 mg/kg/inf	-6,709*	1.46978	125.492	3.52968e-05	-10.2754	-3.14259
		0.3 mg/kg/inf	0 mg/kg/inf	5,519*	1.34004	125.492	0.00020628	2.26692	8.77011
			0.15 mg/kg/inf	6,709*	1.46978	125.492	3.52968e-05	3.14259	10.2754
	Based on estimated marginal means
	*. The mean difference is significant at the ,05 level.
	a. Dependent Variable: ActiveNosePokes.
	c. Adjustment for multiple comparisons: Bonferroni.
	Pairwise Comparisonsa
	Treatment			Mean Difference (I-J)	Std. Error	df	Sig.c	95% Confidence Interval for Differencec
								Lower Bound	Upper Bound
	0 mg/kg/inf	Sham	PSNL	0.0833333	1.38342	125.492	0.952062	-2.65451	2.82118
		PSNL	Sham	-0.0833333	1.38342	125.492	0.952062	-2.82118	2.65451
	0.15 mg/kg/inf	Sham	PSNL	1.33333	1.55893	125.492	0.394023	-1.75187	4.41854
		PSNL	Sham	-1.33333	1.55893	125.492	0.394023	-4.41854	1.75187
	0.3 mg/kg/inf	Sham	PSNL	-7,185*	1.46978	125.492	3.04117e-06	-10.0939	-4.27643
		PSNL	Sham	7,185*	1.46978	125.492	3.04117e-06	4.27643	10.0939
	Based on estimated marginal means
	*. The mean difference is significant at the ,05 level.
	a. Dependent Variable: ActiveNosePokes.
	c. Adjustment for multiple comparisons: Bonferroni.
	Overall Responding
	Active
	2-Way ANOVA
	Type III Tests of Fixed Effectsa
	Source	Numerator df	Denominator df	F	Sig.
	Intercept	1	42	57.8561	1.99851e-09
	Surgery	1	42	2.23933	0.142017
	Dose	2	42	1.51649	0.231256
	Surgery * Dose	2	42	4.477	0.017278
	a. Dependent Variable: Active.
	Pairwise Comparisonsa
	Dose			Mean Difference (I-J)	Std. Error	df	Sig.c	95% Confidence Interval for Differencec
								Lower Bound	Upper Bound
	Vehicle	Sham	PSNL	-0.0625	4.32647	42	0.988543	-8.79366	8.66866
		PSNL	Sham	0.0625	4.32647	42	0.988543	-8.66866	8.79366
	JWH133 0.15 mg/kg/inf	Sham	PSNL	3.28571	4.87537	42	0.504041	-6.55319	13.1246
		PSNL	Sham	-3.28571	4.87537	42	0.504041	-13.1246	6.55319
	JWH133 0.3 mg/kg/inf	Sham	PSNL	-15.159*	4.59655	42	0.0019893	-24.4349	-5.88252
		PSNL	Sham	15.159*	4.59655	42	0.0019893	5.88252	24.4349
	Based on estimated marginal means
	*. The mean difference is significant at the .05 level.
	a. Dependent Variable: Active.
	c. Adjustment for multiple comparisons: Bonferroni.
	Pairwise Comparisonsa
	Surgery			Mean Difference (I-J)	Std. Error	df	Sig.c	95% Confidence Interval for Differencec
								Lower Bound	Upper Bound
	Sham	Vehicle	JWH133 0.15 mg/kg/inf	-0.705357	4.72056	42	1	-12.4769	11.0662
			JWH133 0.3 mg/kg/inf	3.15179	4.72056	42	1	-8.61972	14.9233
		JWH133 0.15 mg/kg/inf	Vehicle	0.705357	4.72056	42	1	-11.0662	12.4769
			JWH133 0.3 mg/kg/inf	3.85714	4.87537	42	1	-8.30042	16.0147
		JWH133 0.3 mg/kg/inf	Vehicle	-3.15179	4.72056	42	1	-14.9233	8.61972
			JWH133 0.15 mg/kg/inf	-3.85714	4.87537	42	1	-16.0147	8.30042
	PSNL	Vehicle	JWH133 0.15 mg/kg/inf	2.64286	4.49487	42	1	-8.56586	13.8516
			JWH133 0.3 mg/kg/inf	-11.944*	4.19081	42	0.0202335	-22.3949	-1.49397
		JWH133 0.15 mg/kg/inf	Vehicle	-2.64286	4.49487	42	1	-13.8516	8.56586
			JWH133 0.3 mg/kg/inf	-14.587*	4.59655	42	0.00844908	-26.0496	-3.12504
		JWH133 0.3 mg/kg/inf	Vehicle	11.944*	4.19081	42	0.0202335	1.49397	22.3949
			JWH133 0.15 mg/kg/inf	14.587*	4.59655	42	0.00844908	3.12504	26.0496
	Based on estimated marginal means
	*. The mean difference is significant at the .05 level.
	a. Dependent Variable: Active.
	c. Adjustment for multiple comparisons: Bonferroni.
Figure 1C
	Heat
	Ipsilateral paw
	Mixed Model Analysis
	Fixed Effects
	Type III Tests of Fixed Effectsa
	Source	Numerator df	Denominator df	F	Sig.
	Intercept	1	100.547	2565.91	2.18997e-73
	Day	2	75.0666	9.09907	0.00028954
	Surgery	1	100.547	185.597	1.43378e-24
	Dose	2	100.524	3.01806	0.053348
	Day * Surgery	2	75.0666	1.0874	0.342342
	Day * Dose	4	75.0301	4.39084	0.00303763
	Surgery * Dose	2	100.524	2.08432	0.129735
	Day * Surgery * Dose	4	75.0301	1.59895	0.183417
	a. Dependent Variable: PTIpsi.
	Pairwise Comparisonsa
	(I) Day		Mean Difference (I-J)	Std. Error	df	Sig.c	95% Confidence Interval for Differencec
							Lower Bound	Upper Bound
	18	3	1.529*	0.389973	64.6061	0.000648723	0.570393	2.48743
		6	1.059*	0.36901	66.1129	0.016486	0.152899	1.96579
	3	18	-1.529*	0.389973	64.6061	0.000648723	-2.48743	-0.570393
		6	-0.469569	0.440634	72.6615	0.870308	-1.54942	0.610279
	6	18	-1.059*	0.36901	66.1129	0.016486	-1.96579	-0.152899
		3	0.469569	0.440634	72.6615	0.870308	-0.610279	1.54942
	Based on estimated marginal means
	*. The mean difference is significant at the .05 level.
	a. Dependent Variable: PTIpsi.
	c. Adjustment for multiple comparisons: Bonferroni.
	Pairwise Comparisonsa
	(I) Surgery		Mean Difference (I-J)	Std. Error	df	Sig.c	95% Confidence Interval for Differencec
							Lower Bound	Upper Bound
	Sham	PSNL	.964*	0.0391327	106.9	6.88198e-46	0.886676	1.04183
	PSNL	Sham	-.964*	0.0391327	106.9	6.88198e-46	-1.04183	-0.886676
	Based on estimated marginal means
	*. The mean difference is significant at the .05 level.
	a. Dependent Variable: VFIpsi.
	c. Adjustment for multiple comparisons: Bonferroni.
	Pairwise Comparisonsa
	Day			Mean Difference (I-J)	Std. Error	df	Sig.c	95% Confidence Interval for Differencec
								Lower Bound	Upper Bound
	18	0	JWH 0.15	-2.664*	0.546846	37	6.29839e-05	-4.03508	-1.29239
			JWH 0.3	-2.547*	0.505486	37	3.75766e-05	-3.81448	-1.27923
		JWH 0.15	0.00	2.664*	0.546846	37	6.29839e-05	1.29239	4.03508
			JWH 0.3	0.116879	0.540593	37	1	-1.23878	1.47254
		JWH 0.3	0.00	2.547*	0.505486	37	3.75766e-05	1.27923	3.81448
			JWH 0.15	-0.116879	0.540593	37	1	-1.47254	1.23878
	3	0.00	JWH 0.15	0.597	0.817105	37	1	-1.45208	2.64608
			JWH 0.3	0.327595	0.755303	37	1	-1.56651	2.2217
		JWH 0.15	0.00	-0.597	0.817105	37	1	-2.64608	1.45208
			JWH 0.3	-0.269405	0.80776	37	1	-2.29505	1.75624
		JWH 0.3	0.00	-0.327595	0.755303	37	1	-2.2217	1.56651
			JWH 0.15	0.269405	0.80776	37	1	-1.75624	2.29505
	6	0.00	JWH 0.15	-0.3677	0.742526	36	1	-2.23221	1.49681
			JWH 0.3	-0.327913	0.701849	36	1	-2.09028	1.43446
		JWH 0.15	0.00	0.3677	0.742526	36	1	-1.49681	2.23221
			JWH 0.3	0.0397873	0.748532	36	1	-1.83981	1.91938
		JWH 0.3	0.00	0.327913	0.701849	36	1	-1.43446	2.09028
			JWH 0.15	-0.0397873	0.748532	36	1	-1.91938	1.83981
	Based on estimated marginal means
	*. The mean difference is significant at the .05 level.
	a. Dependent Variable: PTIpsi.
	c. Adjustment for multiple comparisons: Bonferroni.
	Pairwise Comparisonsa
	Dose			Mean Difference (I-J)	Std. Error	df	Sig.c	95% Confidence Interval for Differencec
								Lower Bound	Upper Bound
	0.00	18	3	-0.516152	0.651146	64.6061	1	-2.11661	1.08431
			6	-0.445652	0.610718	66.5839	1	-1.94555	1.05425
		3	18	0.516152	0.651146	64.6061	1	-1.08431	2.11661
			6	0.0705	0.731198	72.5156	1	-1.72151	1.86251
		6	18	0.445652	0.610718	66.5839	1	-1.05425	1.94555
			3	-0.0705	0.731198	72.5156	1	-1.86251	1.72151
	JWH 0.15	18	3	2.745*	0.736688	64.6061	0.00123549	0.933871	4.5553
			6	1.850*	0.690948	66.5839	0.0279547	0.15344	3.54733
		3	18	-2.745*	0.736688	64.6061	0.00123549	-4.5553	-0.933871
			6	-0.8942	0.827257	72.5156	0.84994	-2.92163	1.13323
		6	18	-1.850*	0.690948	66.5839	0.0279547	-3.54733	-0.15344
			3	0.8942	0.827257	72.5156	0.84994	-1.13323	2.92163
	JWH 0.3	18	3	2.358*	0.63404	64.6061	0.00126025	0.799887	3.91672
			6	1.773*	0.61248	65.004	0.0154612	0.268118	3.27847
		3	18	-2.358*	0.63404	64.6061	0.00126025	-3.91672	-0.799887
			6	-0.585008	0.726927	72.8993	1	-2.36633	1.19631
		6	18	-1.773*	0.61248	65.004	0.0154612	-3.27847	-0.268118
			3	0.585008	0.726927	72.8993	1	-1.19631	2.36633
	Based on estimated marginal means
	*. The mean difference is significant at the .05 level.
	a. Dependent Variable: PTIpsi.
	c. Adjustment for multiple comparisons: Bonferroni.
	Mechanical
	Ipsilateral paw
	Mixed Model Analysis
	Fixed Effects
	Type III Tests of Fixed Effectsa
	Source	Numerator df	Denominator df	F	Sig.
	Intercept	1	106.9	2097.92	4.39225e-72
	Day	2	70.2925	3.35363	0.0406349
	Surgery	1	106.9	607.16	6.88198e-46
	Dose	2	106.897	0.0164746	0.983663
	Day * Surgery	2	70.2925	2.97946	0.0572753
	Day * Dose	4	70.4686	1.04442	0.390606
	Surgery * Dose	2	106.897	1.12209	0.329403
	Day * Surgery * Dose	4	70.4686	2.07642	0.0930108
	a. Dependent Variable: VFIpsi.
	Pairwise Comparisonsa
	(I) Day		Mean Difference (I-J)	Std. Error	df	Sig.b	95% Confidence Interval for Differenceb
							Lower Bound	Upper Bound
	18	3	0.099228	0.0473164	70.9903	0.118639	-0.0167934	0.215249
		6	0.114754	0.048528	71.9556	0.0622336	-0.00419921	0.233708
	3	18	-0.099228	0.0473164	70.9903	0.118639	-0.215249	0.0167934
		6	0.0155263	0.0479305	70.9057	1	-0.102004	0.133057
	6	18	-0.114754	0.048528	71.9556	0.0622336	-0.233708	0.00419921
		3	-0.0155263	0.0479305	70.9057	1	-0.133057	0.102004
	Based on estimated marginal means
	a. Dependent Variable: VFIpsi.
	b. Adjustment for multiple comparisons: Bonferroni.
	Pairwise Comparisonsa
	(I) Surgery		Mean Difference (I-J)	Std. Error	df	Sig.c	95% Confidence Interval for Differencec
							Lower Bound	Upper Bound
	Sham	PSNL	.964*	0.0391327	106.9	6.88198e-46	0.886676	1.04183
	PSNL	Sham	-.964*	0.0391327	106.9	6.88198e-46	-1.04183	-0.886676
	Based on estimated marginal means
	*. The mean difference is significant at the .05 level.
	a. Dependent Variable: VFIpsi.
	c. Adjustment for multiple comparisons: Bonferroni.
Figure 1D	Anxiety-like behavior
	2-Way ANOVA
	Tests of Between-Subjects Effects
	Source		Type III Sum of Squares	df	Mean Square	F	Sig.
	Corrected Model	EntriesEPM	529.316a	5	105.863	3.51233	0.0114813
	Intercept	EntriesEPM	35206.6	1	35206.6	1168.08	6.53353e-28
	Surgery	EntriesEPM	30.4371	1	30.4371	1.00984	0.322039
	Dose	EntriesEPM	204.254	2	102.127	3.38836	0.0455127
	Surgery * Dose	EntriesEPM	237.386	2	118.693	3.93799	0.0289559
	Error	EntriesEPM	1024.78	34	30.1405
	Total	EntriesEPM	38857.4	40
	Corrected Total	EntriesEPM	1554.09	39
	a. R Squared = .341 (Adjusted R Squared = .244)
	b. R Squared = .353 (Adjusted R Squared = .257)
	Pairwise Comparisons
	Dependent Variable				Mean Difference (I-J)	Std. Error	Sig.b	95% Confidence Interval for Differenceb
								Lower Bound	Upper Bound
	EntriesEPM	Sham	0.00	JWH 0.15	4.45775	3.32438	0.566505	-3.91391	12.8294
				JWH 0.3	0.541476	3.05437	1	-7.15023	8.23318
			JWH 0.15	0.00	-4.45775	3.32438	0.566505	-12.8294	3.91391
				JWH 0.3	-3.91627	3.21464	0.694532	-12.0116	4.17901
			JWH 0.3	0.00	-0.541476	3.05437	1	-8.23318	7.15023
				JWH 0.15	3.91627	3.21464	0.694532	-4.17901	12.0116
		PSNL	0.00	JWH 0.15	-5.18405	3.1298	0.320558	-13.0657	2.6976
				JWH 0.3	-10.122*	2.66768	0.00174511	-16.8395	-3.40368
			JWH 0.15	0.00	5.18405	3.1298	0.320558	-2.6976	13.0657
				JWH 0.3	-4.93753	3.0622	0.34835	-12.6489	2.77387
			JWH 0.3	0.00	10.122*	2.66768	0.00174511	3.40368	16.8395
				JWH 0.15	4.93753	3.0622	0.34835	-2.77387	12.6489
	Based on estimated marginal means
	*. The mean difference is significant at the .05 level.
	b. Adjustment for multiple comparisons: Bonferroni.
	Pairwise Comparisons
	Dependent Variable				Mean Difference (I-J)	Std. Error	Sig.b	95% Confidence Interval for Differenceb
								Lower Bound	Upper Bound
	EntriesEPM	0.00	Sham	PSNL	8.557*	2.96496	0.0067338	2.53107	14.5821
			PSNL	Sham	-8.557*	2.96496	0.0067338	-14.5821	-2.53107
		JWH 0.15	Sham	PSNL	-1.0852	3.4722	0.756539	-8.14157	5.97116
			PSNL	Sham	1.0852	3.4722	0.756539	-5.97116	8.14157
		JWH 0.3	Sham	PSNL	-2.10647	2.76672	0.451691	-7.72911	3.51618
			PSNL	Sham	2.10647	2.76672	0.451691	-3.51618	7.72911
	Based on estimated marginal means
	*. The mean difference is significant at the .05 level.
	b. Adjustment for multiple comparisons: Bonferroni.
