# Supplementary material for: Protective role of neuronal and lymphoid cannabinoid CB2 receptors in neuropathic pain
Source: eLife journal article supplement (doi:10.7554/elife.55582), 2020-07-20
Supplement: supp [file elife-55582-supp-v1.zip › elife_poa_e55582_Figure_2_figure_supplement_1_source_data_1.xlsx]

## Sheet: Figure 2-figure suppl1_RawData
		SelfAdmin	Von Frey	Plantar	Plus Maze
		N	N	N	N
C57BL/6J		19	19	19	17
ConstitutiveKO		16	16	16	16
										Figure 2-figure supplement 1A																										Figure 2-figure supplement 1B
										Drug Selfadministration																										Food Selfadministration
										Active JWH133													Inactive JWH133													Active Food						Inactive Food
						Genotype	Mouse		Surgery	day1	day2	day3	day4	day5	day6	day7	day8	day9	day10	day11	day12		day1	day2	day3	day4	day5	day6	day7	day8	day9	day10	day11	day12		day1	day2	day3	day4	day5		day1	day2	day3	day4	day5
						C57BL/6J	V2		PSNL	27	17	13	3	3	3	4	10	9	18	19	9		1	5	4	3	2	2	1	5	2	4	2	5		33	32	29	38	29		17	4	10	3	2
						C57BL/6J	V13		PSNL	5	0	4	7	8	5	3	7	4	7	12	17		3	0	7	7	10	5	4	4	4	2	5	5		40	38	37	32	31		19	9	7	3	1
						C57BL/6J	V14		PSNL	19	23	33	38	27	22	30	27	29	30	26	32		3	1	3	1	1	3	2	11	7	17	10	13		46	25	37	51	37		39	3	5	0	15
						C57BL/6J	W6		PSNL	2	3	8	11	6	7	10	11	3	11	10	18		0	0	4	2	2	0	0	1	0	0	1	2		38	20	19	27	48		19	5	6	7	16
						C57BL/6J	W10		PSNL	21	20	14	11	13	16	12	17	19	16	13	18		2	0	0	2	0	1	2	2	1	0	2	2		33	50	49	38	46		8	2	6	2	0
						C57BL/6J	X15		PSNL	27	23	21	22	23	19	38	38	27	25	32	37		2	3	1	5	11	7	4	2	5	2	3	1		42	43	49	66	49			14	5	11	4
						C57BL/6J	Z1		PSNL	18	20	9	20	13	11	7	15	9	11	11	9		1	6	2	2	4	1	2	2	2	3	4	0		30	33	30	27	46		12	3	11	4	2
						C57BL/6J	Z2		PSNL	24	13	15	15	20	18	23	24	13	11	8	7		5	1	3	7	2	1	1	4	3	1	3	3		19	45	48	39	55		19	7	6	7	3
						C57BL/6J	Z3		PSNL	35	36	22	20	14	11	23	27	22	13	23	26		3	2	2	1	1	0	1	0	1	1	0	3		24	45	55	36	64		15	10	6	2	4
						C57BL/6J	Z4		PSNL	44	28	18	23	26	24	25	21	24	16	19	20		3	6	2	9	4	2	2	1	0	2	13	4		27	42	65	46	79		29	4	6	6	2
						C57BL/6J	O1		PSNL	15	30	19	11	16	37	35	33	27	15	36	19		0	2	3	0	2	3	1	3	0	0	0	1		65	62	64	62	100		23	2	2	3	6
						C57BL/6J	O2		PSNL	7	21	31	13	5	4	5	6	4	5	3	4		3	10	3	2	1	1	2	1	2	2	1	0		3	15	63	71	76		5	6	5	8	6
						C57BL/6J	O3		PSNL	38	10	18	18	11	9	8	10	10	6	5	9		5	3	4	3	3	4	4	1	2	2	1	2		43	39	52	42	45		25	11	7	17	1
						C57BL/6J	O4		PSNL	37	18	13	14	6	7	9	10	11	14	18	11		0	10	1	1	0	0	1	1	2	0	3	1		44	37	65	59	60		8	1	0	0	10
						C57BL/6J	O9		PSNL	35	25	22	16	5	10	8	7	7	6	4	2		0	0	0	0	0	0	0	0	0	0	0	0		37	25	100	100	100		11	2	3	1	1
						C57BL/6J	O11		PSNL	29	1	2	10	16	8	6	8	12	9	10	10		2	0	0	2	1	0	1	0	0	0	2	2		33	42	62	55	48		16	1	10	9	5
						C57BL/6J	O13		PSNL	11	8	8	1	2	10	4	2	5	3	2	2		2	2	1	0	3	1	0	0	1	1	0	0		35	53	100	89	93		11	1	3	0	2
						C57BL/6J	A8		PSNL	13	24	39	29	34	21	23	19	16	8	6	4		0	1	0	2	5	1	0	0	3	1	0	0		39	44	64	66	95		15	7	1	0	0
						C57BL/6J	A11		PSNL	25	27	7	16	7	11	11	16	13	8	8	7		2	1	0	1	0	0	0	1	0	1	0	1		45	49	47	34	41		23	9	15	10	12
						ConstitutiveKO	V6		PSNL	49	9	14	14	20	18	19	15	10	16	13	15		4	0	2	0	0	1	1	0	1	1	2	1		49	51	63	72	41		7	2	2	6	1
						ConstitutiveKO	V12		PSNL	7	0	7	4	7	18	14	15	15	11	7	13		1	0	2	5	2	4	1	1	5	5	8	6		48	42	56	44	41		7	6	7	12	6
						ConstitutiveKO	W15		PSNL	10	19	19	9	11	7	15	8	9	12	14	19				1	4	0	2	1	2	0	2	4	2		50	29	19	10	17				3	2	3
						ConstitutiveKO	L11		PSNL	18	22	24	16	14	25	12	10	12	7	13	6		0	0	0	0	0	0	0	0	0	0	0	0		34	21	49	46	45		22	23	7	4	12
						ConstitutiveKO	M12		PSNL	10	5	8	7	2	2	3	2	3	1	2	1		2	4	3	0	8	1	0	0	2	0	1	0		22	6	7	20	45		22	0	1	1	1
						ConstitutiveKO	N4		PSNL	12	24	28	13	12	21	19	8	24	14	5	6		3	4	5	1	1	15	1	2	2	3	5	4		33	46	66	83	90		13	22	17	4	1
						ConstitutiveKO	N10		PSNL	30	29	8	14	12	18	10	17	20	12	12	19		0	0	0	0	0	0	0	0	0	0	0	0		50	42	34	35	55		24	10	14	6	14
						ConstitutiveKO	B8		PSNL	29	19	16	13	6	6	8	8	3	0	3	1		0	0	0	2	0	1	1	1	2	0	0	5		40	57	77	62	76		8	12	5	2	7
						ConstitutiveKO	B12		PSNL	18	15	10	5	4	4	4	7	11	5	4	8		8	9	3	8	8	4	4	9	6	9	3	6		34	44	56	87	40		20	9	12	4	16
						ConstitutiveKO	C6		PSNL	6	5	3	5	2	1	3	6	5	8	4	7		1	1	2	2	0	0	0	1	2	1	5	1		6	13	20	18	28		13	4	7	11	7
						ConstitutiveKO	C14		PSNL	23	28	24	28	22	8	5	6	3	3	6	9		0	6	2	5	1	0	0	0	0	0	3	2		45	50	72	69	67		23	14	6	9	11
						ConstitutiveKO	D7		PSNL	27	19	26	18	12	15	21	12	9	7	12	12		3	1	2	3	5	3	7	6	2	0	4	0		22	37	47	47	66		12	4	4	5	9
						ConstitutiveKO	H6		PSNL	8	9	19	18	22	13	13	24	14	8	9	4		0	0	0	0	3	0	2	0	3	2	1	0		33	27	39	62	66		4	6	0	5	3
						ConstitutiveKO	H10		PSNL	16	13	12	8	13	6	14	12	7	7	6	9		9	12	2	6	3	5	14	11	8	4	4	5		9	3	38	58	82		11	4	3	1	0
						ConstitutiveKO	I2		PSNL	6	25	10	12	6	7	11	5	11	9	14	15		5	8	0	1	1	1	10	5	10	2	5	5		33	50	58	63	47		24	7	9	5	2
						ConstitutiveKO	J15		PSNL	3	4	8	3	2	8	3	1	2	0	2	5		4	4	2	1	1	2	0	0	3	2	1	1		36	37	48	40	31		17	10	4	6	9
								C57BL/6J	Average	22.7368	18.2632	16.6316	15.6842	13.4211	13.3158	14.9474	16.2105	13.8947	12.2105	13.9474	13.7368		1.94737	2.78947	2.10526	2.63158	2.73684	1.68421	1.47368	2.05263	1.84211	2.05263	2.63158	2.36842		35.5789	38.8947	54.4737	51.4737	60.1053		17.4444	5.31579	6	4.89474	4.84211
									SD	12.0085	10.0766	9.9175	8.73087	9.0757	8.49217	11.2075	9.91396	8.45836	6.85224	9.79497	9.95458		1.58021	3.1899	1.88251	2.56495	3.1063	1.94515	1.3486	2.63468	1.92247	3.79288	3.49937	3.04066		12.6153	11.7752	21.0274	20.4216	23.44		8.34705	3.84495	3.63624	4.62955	4.92458
									N	19	19	19	19	19	19	19	19	19	19	19	19		19	19	19	19	19	19	19	19	19	19	19	19		19	19	19	19	19		18	19	19	19	19
									SEM	2.75494	2.31173	2.27523	2.003	2.08211	1.94824	2.57118	2.27442	1.94048	1.57201	2.24712	2.28374		0.362526	0.731812	0.431878	0.588439	0.712635	0.446249	0.309389	0.604436	0.441046	0.870147	0.802811	0.697575		2.89415	2.70141	4.82402	4.68503	5.3775		1.96742	0.882092	0.83421	1.06209	1.12978
								ConstitutiveKO	Average	17	15.3125	14.75	11.6875	10.4375	11.0625	10.875	9.75	9.875	7.5	7.875	9.3125		2.66667	3.26667	1.625	2.375	2.0625	2.4375	2.625	2.375	2.875	1.9375	2.875	2.375		34	34.6875	46.8125	51	52.3125		15.1333	8.86667	6.3125	5.1875	6.375
									SD	12.16	9.17764	7.74166	6.55966	6.79185	7.27066	6.07591	5.91608	6.2703	4.84424	4.48516	5.70051		2.91956	3.91821	1.40831	2.52653	2.71953	3.72324	4.16133	3.5	2.96367	2.43499	2.30579	2.36291		13.648	16.6161	19.7593	22.6833	20.4865		6.98843	6.69613	4.7289	3.22942	5.08429
									N	16	16	16	16	16	16	16	16	16	16	16	16		15	15	16	16	16	16	16	16	16	16	16	16		16	16	16	16	16		15	15	16	16	16
									SEM	3.04001	2.29441	1.93542	1.63992	1.69796	1.81767	1.51898	1.47902	1.56758	1.21106	1.12129	1.42513		0.753826	1.01168	0.352077	0.631631	0.679882	0.930809	1.04033	0.875	0.740917	0.608747	0.576447	0.590727		3.41199	4.15403	4.93982	5.67083	5.12162		1.8044	1.72893	1.18223	0.807356	1.27107

## Sheet: Figure2-figure suppl1_Stats
Figure2-figure supplement1A
	Mixed Model Analysis
	Fixed Effects
	Type III Tests of Fixed Effectsa
	Source	Numerator df	Denominator df	F	Sig.
	Intercept	1	353.163	1003.08	3.20066e-105
	Day	11	55.0936	3.09081	0.00269572
	Genotype	1	353.163	23.9969	1.47211e-06
	Genotype * Day	11	55.0936	0.253515	0.991525
	a. Dependent Variable: Active.
	Pairwise Comparisonsa
	(I) Genotype		Mean Difference (I-J)	Std. Error	df	Sig.c	95% Confidence Interval for Differencec
							Lower Bound	Upper Bound
	C57Bl6/J	CB2KO	4.130*	0.84313	353.163	1.47211e-06	2.47202	5.7884
	CB2KO	C57Bl6/J	-4.130*	0.84313	353.163	1.47211e-06	-5.7884	-2.47202
	Based on estimated marginal means
	*. The mean difference is significant at the .05 level.
	a. Dependent Variable: Active.
	c. Adjustment for multiple comparisons: Bonferroni.
