# Supplementary material for: Protective role of neuronal and lymphoid cannabinoid CB2 receptors in neuropathic pain
Source: eLife journal article supplement (doi:10.7554/elife.55582), 2020-07-20
Supplement: supp [file elife-55582-supp-v1.zip › elife_poa_e55582_Figure_2_figure_supplement_2_source_data_1.xlsx]

## Sheet: Figure 2-figure suppl2_RawData
					Von Frey									Von Frey													Plantar									Plantar
					Ipsilateral Paw									Contralateral Paw						Von Frey							Ipsilateral Paw									Contralateral Paw						Plantar
		Mouse	Genotype	Surgery	Baseline Response	JWH133 0 mg/kg	JWH133 5 mg/kg	JWH133 10 mg/kg	After response		Mouse	Genotype	Surgery	Baseline Response	JWH133 0 mg/kg	JWH133 5 mg/kg	JWH133 10 mg/kg	After response		Avg Baseline				Mouse	Genotype	Surgery	Baseline Response	JWH133 0 mg/kg	JWH133 5 mg/kg	JWH133 10 mg/kg	After response		Mouse	Genotype	Surgery	Baseline Response	JWH133 0 mg/kg	JWH133 5 mg/kg	JWH133 10 mg/kg	After response		Avg Baseline
	1	WT1 o	wt	Sham	1.137	1.502	1.513	1.392	1.241		WT1 o	wt	Sham	1.137	1.392	1.392	1.241	1.502		1.137				WT1 o	wt	Sham	10.8333	14.2333	10.4667	9.45	11.65		WT1 o	wt	Sham	8.675	8.3	9.83333	9.3	9.7		9.75417
	2	WT2 2R	wt	Sham	1.513	1.502	1.513	1.241	1.392		WT2 2R	wt	Sham	1.513	1.392	1.502	1.513	1.513		1.513				WT2 2R	wt	Sham	12.7333	10.8	11.4	12.5667	9.7		WT2 2R	wt	Sham	10.3333	9	9.86667	11.8667	13.5667		11.5333
	3	WT3 1L	wt	Sham	0.993	1.502	1.513	1.513	1.241		WT3 1L	wt	Sham	1.392	1.241	1.513	1.513	1.513		1.1925				WT3 1L	wt	Sham	9.63333	11.15	7.8	8.83333	6.2		WT3 1L	wt	Sham	9.36667	12.4667	12.0667	8.6	10.6667		9.5
	4	WT10 2R1L	wt	Sham	1.241	1.513	1.241	0.997	1.513		WT10 2R1L	wt	Sham	1.513	1.392	1.086	1.513	1.513		1.377				WT10 2R1L	wt	Sham	11.3667	10.7	9.95	10.3	12.95		WT10 2R1L	wt	Sham	13.1333	5.5	9.1	9.8	5.53333		12.25
	5	WT11 2L	wt	Sham	1.513	1.241	1.392	1.502	0.966		WT11 2L	wt	Sham	1.241	1.241	1.392	0.933	1.513		1.377				WT11 2L	wt	Sham	12.1667	9.73333	10.8333	14.8	10.9667		WT11 2L	wt	Sham	13.3	7.9	8	10.9	13.3		12.7333
	6	WT12 1L	wt	Sham	1.513	1.513	1.513	1.392	1.513		WT12 1L	wt	Sham	1.241	1.513	1.513	1.513	1.392		1.377				WT12 1L	wt	Sham	8.63333	9.96667	8.1	6.93333	8.56667		WT12 1L	wt	Sham	9.13333	11.9667	8	7.65	11.9667		8.88333
	7	WT4 1R1L	wt	PSNL	1.392	0.111	1.007	0.731	0.334		WT4 1R1L	wt	PSNL	1.241	1.218	1.392	1.086	1.502		1.3165				WT4 1R1L	wt	PSNL	8.8	4.06667	5.83333	6.03333	5.3		WT4 1R1L	wt	PSNL	9	8.6	11.9	8.1	10.1667		8.9
	8	WT5 1R	wt	PSNL	1.392	0.512	0.891	1.218	0.334		WT5 1R	wt	PSNL	1.513	1.086	0.966	0.933	1.392		1.4525				WT5 1R	wt	PSNL	13.4	5.9	8.66667	8.96667	4.73333		WT5 1R	wt	PSNL	12.7333	7.825	8.75	10.3	7.6		13.0667
	9	WT6 2L	wt	PSNL	1.513	0.709	0.891	1.241	0.549		WT6 2L	wt	PSNL	1.513	1.502	0.82	1.392	1.513		1.513				WT6 2L	wt	PSNL	7.8	2.56667	6.525	8.775	2.2		WT6 2L	wt	PSNL	8.13333	9.55	10.85	6.93333	7.5		7.96667
	10	WT72R	wt	PSNL	1.392	0.669	0.825	1.241	0.579		WT72R	wt	PSNL	1.513	1.392	1.392	1.513	1.513		1.4525				WT72R	wt	PSNL	8.3	7.75	6.53333	8.4	6.45		WT72R	wt	PSNL	11.55	8.03	9.3	10.6	9.76667		9.925
	11	WT9 1R	wt	PSNL	1.392	0.669	0.891	1.218	0.709		WT9 1R	wt	PSNL	1.137	1.241	1.241	1.392	1.513		1.2645				WT9 1R	wt	PSNL	10.3667	7.45	8.43333	7.9	4.26667		WT9 1R	wt	PSNL	13.7	7.2	15.2	10.35	11.3		12.0333
	12	WT8 o	wt	PSNL	1.513	0.334	0.625	0.962	0.343		WT8 o	wt	PSNL	1.513	1.392	1.513	1.513	1.392		1.513				WT8 o	wt	PSNL	8.9	2.36667	5.4	8.33333	3.76667		WT8 o	wt	PSNL	12.5	14.1667	8.3	6.95	12.9		10.7
	13	KO11 2R2L	TRPA1KO	Sham	1.502	1.502	0.966	1.392	1.218		KO11 2R2L	TRPA1KO	Sham	1.502	1.218	1.218	1.502	1.137		1.502				KO11 2R2L	TRPA1KO	Sham	11.075	10.4	10	7.1	11.2333		KO11 2R2L	TRPA1KO	Sham	11.7667	12.1667	8.66667	8.95	12.4		11.4208
	14	KO12 2R	TRPA1KO	Sham	1.513	1.392	1.513	1.513	1.241		KO12 2R	TRPA1KO	Sham	1.392	1.241	1.513	1.392	1.502		1.4525				KO12 2R	TRPA1KO	Sham	8.6	11.4667	5.65	7.9	12.3		KO12 2R	TRPA1KO	Sham	8.45	8.56667	9.53333	9.75	12.2		8.525
	15	KO10 2L	TRPA1KO	Sham	1.513	1.392	1.513	0.933	1.513		KO10 2L	TRPA1KO	Sham	1.513	1.513	1.513	1.502	1.502		1.513				KO10 2L	TRPA1KO	Sham	11.4667	9.4	12.1	9.025	8.33333		KO10 2L	TRPA1KO	Sham	12.5	6.15	9.26667	10.9	9.975		11.9833
	16	KO9 1L	TRPA1KO	Sham	1.392	1.513	1.513	1.392	1.241		KO9 1L	TRPA1KO	Sham	1.392	1.513	1.086	1.513	1.392		1.392				KO9 1L	TRPA1KO	Sham	13.2333	12.4333	7.1	9.43333	9.4		KO9 1L	TRPA1KO	Sham	10.9	7.8	7.13333	9.1	10.8		12.0667
	17	KO7 1R1L	TRPA1KO	Sham	1.218	1.086	1.392	1.137	0.933		KO7 1R1L	TRPA1KO	Sham	1.502	1.392	1.241	1.502	1.392		1.36				KO7 1R1L	TRPA1KO	Sham	8.6	9	8.53333	12.7333	9.7		KO7 1R1L	TRPA1KO	Sham	12.2	8.13333	13.9333	11.7333	8.43333		10.4
	18	KO8 2R	TRPA1KO	Sham	1.241	1.502	1.392	1.392	1.392		KO8 2R	TRPA1KO	Sham	1.392	1.137	0.997	1.392	1.241		1.3165				KO8 2R	TRPA1KO	Sham	14.4667	10.9	11.8667	10.8	12.8		KO8 2R	TRPA1KO	Sham	11.4333	11.9	15.15	9.83333	12.3667		12.95
	19	KO13 1R	TRPA1KO	Sham	1.241	1.513	1.392	1.513	1.241		KO13 1R	TRPA1KO	Sham	1.241	1.513	1.241	1.513	1.241		1.241				KO13 1R	TRPA1KO	Sham	12.4	13.5	6.8	11.1	12.3667		KO13 1R	TRPA1KO	Sham	11.1	11.8	13.65	10.65	14.7		11.75
	20	KO14 o	TRPA1KO	Sham	1.241	1.218	1.513	1.513	1.513		KO14 o	TRPA1KO	Sham	1.392	1.513	0.933	0.891	1.392		1.3165				KO14 o	TRPA1KO	Sham	13.0333	9.76667	13.8	7.15	11.35		KO14 o	TRPA1KO	Sham	9.86667	13.7	13.8	9.95	7.6		11.45
	21	KO15 1R1L	TRPA1KO	Sham	1.502	1.086	1.392	1.218	1.241		KO15 1R1L	TRPA1KO	Sham	1.218	1.241	1.218	1.241	1.513		1.36				KO15 1R1L	TRPA1KO	Sham	10.8	10.2333	12.75	9.03333	9.5		KO15 1R1L	TRPA1KO	Sham	11.5333	9.1	9.5	8.5	12		11.1667
	22	KO18 1R	TRPA1KO	PSNL	1.513	0.223	1.218	1.086	0.272		KO18 1R	TRPA1KO	PSNL	1.513	1.513	1.502	1.513	1.513		1.513				KO18 1R	TRPA1KO	PSNL	6.83333	7.2	10.45	12.7	8.5		KO18 1R	TRPA1KO	PSNL	8.5	10.7	9.35	10.6	5.25		7.66667
	23	KO19 2R1L	TRPA1KO	PSNL	0.997	0.343	1.007	1.137	0.701		KO19 2R1L	TRPA1KO	PSNL	1.502	1.392	1.502	1.513	0.997		1.2495				KO19 2R1L	TRPA1KO	PSNL	10.1	8.15	10.075	9.63333	8.03333		KO19 2R1L	TRPA1KO	PSNL	7.66667	10.1	10.45	9.6	10.4667		8.88333
	24	KO16 o	TRPA1KO	PSNL	1.392	0.343	1.137	1.086	0.669		KO16 o	TRPA1KO	PSNL	1.392	1.137	1.392	1.392	1.392		1.392				KO16 o	TRPA1KO	PSNL	8.16667	10.25	11.95	9.875	11.5333		KO16 o	TRPA1KO	PSNL	10.9333	9.43333	11.85	14.0667	11.9		9.55
	25	KO17 1R2L	TRPA1KO	PSNL	1.513	0.625	0.891	1.137	0.625		KO17 1R2L	TRPA1KO	PSNL	1.502	1.513	1.218	1.513	1.218		1.5075				KO17 1R2L	TRPA1KO	PSNL	11.1	9.7	9.9	10.55	6.83333		KO17 1R2L	TRPA1KO	PSNL	12.1	7.1	14.5	9.2	8.66667		11.6
	26	KO1 o	TRPA1KO	PSNL	1.241	0.512	0.731	1.218	0.223		KO1 o	TRPA1KO	PSNL	1.392	1.513	1.392	1.502	1.241		1.3165				KO1 o	TRPA1KO	PSNL	14.1667	9.16667	9.05	10.975	10.0333		KO1 o	TRPA1KO	PSNL	14.2333	10.4667	9.05	12.9667	11.3		14.2
	27	KO2 1R	TRPA1KO	PSNL	1.241	0.709	0.731	0.825	0.42		KO2 1R	TRPA1KO	PSNL	1.513	1.241	1.241	1.218	1.513		1.377				KO2 1R	TRPA1KO	PSNL	11.5667	8.125	7.825	7.15	7.53333		KO2 1R	TRPA1KO	PSNL	8.46667	8.33333	7.56667	7.7	8.9		10.0167
	28	KO4 1R1L	TRPA1KO	PSNL	1.392	0.42	0.864	1.218	0.198		KO4 1R1L	TRPA1KO	PSNL	1.513	1.137	0.997	0.891	1.137		1.4525				KO4 1R1L	TRPA1KO	PSNL	12.2667	8.175	10.6	8.85	8.8		KO4 1R1L	TRPA1KO	PSNL	8.7	7.53333	5.4	10.2	12.4333		10.4833
	29	KO3 1L	TRPA1KO	PSNL	1.513	0.42	1.086	0.933	0.163		KO3 1L	TRPA1KO	PSNL	1.513	1.392	1.218	1.513	1.137		1.513				KO3 1L	TRPA1KO	PSNL	11.6333	8.66667	11.375	11.15	6.925		KO3 1L	TRPA1KO	PSNL	8.15	9.55	6.775	8.75	10.35		9.89167
	30	KO5 2R	TRPA1KO	PSNL	1.513	0.512	1.137	1.241	0.669		KO5 2R	TRPA1KO	PSNL	1.502	1.502	1.392	1.502	1.137		1.5075				KO5 2R	TRPA1KO	PSNL	11.9667	9.375	10.25	10.4667	9		KO5 2R	TRPA1KO	PSNL	10.9667	9.26667	10.1	9.16667	11.9333		11.4667
	31	KO6 2L	TRPA1KO	PSNL	1.086	0.334	0.669	1.086	0.223		KO6 2L	TRPA1KO	PSNL	1.241	1.513	0.82	1.264	0.891		1.1635				KO6 2L	TRPA1KO	PSNL	8.13333	9.9	9.4	9.75	8.66667		KO6 2L	TRPA1KO	PSNL	8.63333	12.225	8.3	11.6	11.55		8.38333
		wt	Sham	Average	1.31833	1.46217	1.4475	1.3395	1.311		wt/wt	Sham	Average	1.3395	1.36183	1.39967	1.371	1.491		1.32892				wt	Sham	Average	10.8944	11.0972	9.75833	10.4806	10.0056		wt/wt	Sham	Average	10.6569	9.18889	9.47778	9.68611	10.7889		10.7757
				N	6	6	6	6	6				N	6	6	6	6	6		6						N	6	6	6	6	6				N	6	6	6	6	6		6
				SD	0.227328	0.108483	0.112146	0.194437	0.208324				SD	0.157081	0.104674	0.164113	0.240583	0.0486991		0.138755						SD	1.54466	1.62619	1.48151	2.80714	2.40598				SD	2.05608	2.62887	1.51594	1.53074	2.97424		1.60199
				SEM	0.0928061	0.044288	0.0457834	0.0793787	0.0850478				SEM	0.0641279	0.0427328	0.0669988	0.0982174	0.0198813		0.0566463						SEM	0.630603	0.663889	0.604822	1.14601	0.982237				SEM	0.83939	1.07323	0.61888	0.624921	1.21423		0.65401
		wt	PSNL	Average	1.43233	0.500667	0.855	1.10183	0.474667		wt/wt	PSNL	Average	1.405	1.30517	1.22067	1.30483	1.47083		1.41867				wt	PSNL	Average	9.59444	5.01667	6.89861	8.06806	4.45278		wt/wt	PSNL	Average	11.2694	9.22861	10.7167	8.87222	9.87222		10.4319
				N	6	6	6	6	6				N	6	6	6	6	6		6						N	6	6	6	6	6				N	6	6	6	6	6		6
				SD	0.0624841	0.236568	0.127116	0.21109	0.160146				SD	0.170515	0.150714	0.272019	0.240005	0.0612125		0.104204						SD	2.05366	2.37065	1.35167	1.06359	1.43985				SD	2.21942	2.54578	2.57811	1.74689	2.10211		1.91099
				SEM	0.025509	0.0965784	0.0518948	0.0861771	0.0653792				SEM	0.0696123	0.0615285	0.111051	0.0979814	0.0249899		0.0425411						SEM	0.838403	0.967815	0.551817	0.434211	0.587815				SEM	0.906074	1.03931	1.05251	0.713165	0.858181		0.78016
		TRPA1KO	Sham	Average	1.37367	1.356	1.39844	1.33367	1.28144		wt/tg	Sham	Average	1.39378	1.36456	1.21778	1.38311	1.368		1.38372				TRPA1KO	Sham	Average	11.5194	10.7889	9.84444	9.36389	10.7759		wt/tg	Sham	Average	11.0833	9.92407	11.1815	9.92963	11.1639		11.3014
				N	9	9	9	9	9				N	9	9	9	9	9		9						N	9	9	9	9	9				N	9	9	9	9	9		9
				SD	0.136536	0.180058	0.173085	0.199775	0.177285				SD	0.107174	0.155197	0.20081	0.205753	0.134296		0.0908529						SD	2.01417	1.46458	2.94539	1.89829	1.58642				SD	1.24972	2.52967	2.91963	1.0276	2.20665		1.25226
				SEM	0.0455119	0.0600192	0.0576949	0.0665916	0.0590951				SEM	0.0357246	0.0517322	0.0669367	0.0685842	0.0447654		0.0302843						SEM	0.67139	0.488194	0.981798	0.632764	0.528808				SEM	0.416574	0.843224	0.973212	0.342533	0.73555		0.417419
		TRPA1KO	PSNL	Average	1.3401	0.4441	0.9471	1.0967	0.4163		wt/tg	PSNL	Average	1.4583	1.3853	1.2674	1.3821	1.2176		1.3992				TRPA1KO	PSNL	Average	10.5933	8.87083	10.0875	10.11	8.58583		wt/tg	PSNL	Average	9.835	9.47083	9.33417	10.385	10.275		10.2142
				N	10	10	10	10	10				N	10	10	10	10	10		10						N	10	10	10	10	10				N	10	10	10	10	10		10
				SD	0.190581	0.147094	0.196972	0.131005	0.226005				SD	0.0904975	0.157433	0.219977	0.20533	0.205563		0.123625						SD	2.26229	0.965167	1.16668	1.47648	1.42427				SD	2.13152	1.53485	2.60658	1.97663	2.17296		1.87515
				SEM	0.0602671	0.0465151	0.0622881	0.0414273	0.0714692				SEM	0.0286178	0.0497847	0.069563	0.0649312	0.0650048		0.0390936						SEM	0.7154	0.305213	0.368937	0.466904	0.450394				SEM	0.674045	0.485362	0.824273	0.625065	0.687149		0.592973
			wt/wt	Average	1.37533							wt/wt	Average	1.37225					wt/wt	1.37379					wt/wt	Average	10.2444							wt/wt	Average	10.9632					wt/wt	10.6038
				N	12								N	12						12						N	12								N	12						12
				SD	0.169732								SD	0.160005						0.126031						SD	1.86078								SD	2.06468						1.69077
				SEM	0.0489974								SEM	0.0461895						0.036382						SEM	0.53716								SEM	0.596021						0.488084
						t test	0.754248								t test	0.245289					t test	0.671393						t test	0.303709								t test	0.455935					t test	0.840469
			wt/tg	Average	1.356							wt/tg	Average	1.42774					wt/tg	1.39187					wt/tg	Average	11.032							wt/tg	Average	10.4263					wt/tg	10.7292
				N	19								N	19						19						N	19								N	19						19
				SD	0.163531								SD	0.101466						0.106645						SD	2.1419								SD	1.83736						1.66316
				SEM	0.0375166								SEM	0.023278						0.024466						SEM	0.491386								SEM	0.42152						0.381556
