# Supplementary material for: Protective role of neuronal and lymphoid cannabinoid CB2 receptors in neuropathic pain
Source: eLife journal article supplement (doi:10.7554/elife.55582), 2020-07-20
Supplement: supp [file elife-55582-supp-v1.zip › elife_poa_e55582_Figure_2_source_data_1.xlsx]

## Sheet: Figure2_RawData
		SelfAdmin	Von Frey	Plantar	Plus Maze
		N	N	N	N
C57BL/6J		19	19	19	17
ConstitutiveKO		16	16	16	16
								Figure 2A															Figure 2B																		Figure 2C
								JWH133 Self-administration															Von Frey test									Plantar test									Elevated Plus Maze
								Active Session Responding			Overall		Inactive Session Responding			Overall		Discrimination Index			Overall		VF IPSI				VF CONTRA					PT IPSI				PT CONTRA
						Genotype	Mouse	day10	day11	day12	AUC LAST 3 days ACTIVE		day10	day11	day12	AUC LAST 3 days INACTIVE		day10	day11	day12	AUC LAST 3 days DI		Day-1	Day3	Day6	Day18	Day-1	Day3	Day6	Day18		Day-1	Day3	Day6	Day18	Day-1	Day3	Day6	Day18		% Entries Open Arms
						C57BL/6J	V2	18	19	9	32.5		4	2	5	6.5		0.636364	0.809524	0.285714	1.27056		1.513	0.42	0.579	0.42	1.513	0.891	0.864	1.502		10.23	3.78667	4.4375	5.14333	9.57	10.245	9.755	11.16		37.5
						C57BL/6J	V13	7	12	17	24		2	5	5	8.5		0.555556	0.411765	0.545455	0.96227		1.502	0.247	0.42	0.933	1.137	0.82	0.966	1.392		9.71	7.9	6.52667	4.48333	9.49667	12.1767	10.25	10.1767
						C57BL/6J	V14	30	26	32	57		17	10	13	25		0.276596	0.444444	0.422222	0.793853		1.392	0.42	0.272	1.513	1.513	0.891	1.086	1.513		10.31	6.73	5.24333	8.1	7.69333	9.73667	10.5067	9.895		20
						C57BL/6J	W6	11	10	18	24.5		0	1	2	2		1	0.818182	0.8	1.71818		1.513	0.579	0.42	0.486	1.502	1.218	0.731	1.513		9.47	6.59	4.00333	6.00667	10.6533	12.7925	8.93	10.5133		26.9231
						C57BL/6J	W10	16	13	18	30		0	2	2	3		1	0.733333	0.8	1.63333		1.241	0.183	0.418	0.512	1.513	0.579	0.891	1.502		11.4133	4.92333	3.93333	6.69333	11.2733	9.46	12.93	10.6233		45.4545
						C57BL/6J	X15	25	32	37	63		2	3	1	4.5		0.851852	0.828571	0.947368	1.72818		1.137	0.864	0.549	0.512	1.137	1.086	0.891	1.086		8.2725	2.97667	4.73	5.22	6.7475	7.65667	9.44	12.28		30.7692
						C57BL/6J	Z1	11	11	9	21		3	4	0	5.5		0.571429	0.466667	1	1.25238		1.513	0.625	0.579	1.086	1.513	1.218	1.513	1.502		8.62333	5.86333	5.01	9.41333	9.935	10.3	10.0133	9.24		33.3333
						C57BL/6J	Z2	11	8	7	17		1	3	3	5		0.833333	0.454545	0.4	1.07121		1.513	0.709	0.223	0.825	0.981	1.007	1.007	1.218		9.76	6.19667	5.07	8.81333	10.6	10.1033	10.41	11.46		34.7826
						C57BL/6J	Z3	13	23	26	42.5		1	0	3	2		0.857143	1	0.793103	1.82512		1.513	0.176	0.42	1.137	1.513	1.218	1.502	1.392		8.84667	7.40667	3.52333	10.4167	13.0175	12.46	11.96	11.4967		38.4615
						C57BL/6J	Z4	16	19	20	37		2	13	4	16		0.777778	0.1875	0.666667	0.909722		1.137	0.625	0.17	1.007	1.513	1.392	1.513	1.513		8.49	7.14	4.90667	9.675	8.79667	13.72	8.77	11.2733		40.625
						C57BL/6J	O1	15	36	19	53		0	0	1	0.5		1	1	0.9	1.95		1.502	0.247	0.058	0.966	1.241	1.513	0.997	1.137		10.2433	5.04667	6.44	13.245	13.84	12.83	10.5167	20		39.2857
						C57BL/6J	O2	5	3	4	7.5		2	1	0	2		0.428571	0.5	1	1.21429		0.997	0.479	0.549	1.086	1.241	0.997	1.502	1.241		9.95	6.22	5.31	12.33	11.5233	8.23	8.955	9.03		31.8182
						C57BL/6J	O3	6	5	9	12.5		2	1	2	3		0.5	0.666667	0.636364	1.23485		1.513	0.17	0.334	0.669	1.513	1.241	1.513	1.241		10.95	4.96333	5.78667	10.3333	9.89	9.33	11.7467	10.7167		31.25
						C57BL/6J	O4	14	18	11	30.5		0	3	1	3.5		1	0.714286	0.833333	1.63095		1.241	0.418	0.334	0.334	1.513	1.218	1.392	1.086		9.88333	6.265	5.25667	10.42	11.7367	10.4925	13.22	15.885		33.3333
						C57BL/6J	O9	6	4	2	8		0	0	0	0		1	1	1	2		1.513	0.669	0.198	0.966	1.513	1.392	0.933	1.513		11.5733	4.34333	6.735	9.35	11.11	8.67333	10.5767	12.115		33.3333
						C57BL/6J	O11	9	10	10	19.5		0	2	2	3		1	0.666667	0.666667	1.5		1.392	0.512	0.223	0.512	1.392	1.502	1.241	0.891		11.6833	6.26	6.775	8.72667	9.52	10.235	9.83	13.6267		33.3333
						C57BL/6J	O13	3	2	2	4.5		1	0	0	0.5		0.5	1	1	1.75		1.513	0.549	0.183	0.731	1.513	1.513	1.502	1.218		10.57	6.3325	9.34	13.5433	10.05	9.91667	12.8175	13.57		33.3333
						C57BL/6J	A8	8	6	4	12		1	0	0	0.5		0.777778	1	1	1.88889		1.513	0.334	0.198	0.579	1.513	1.137	1.086	1.392		10.89	8.66333	4.81	7.11	11.22	10.0333	4.52	7.47		38.4615
						C57BL/6J	A11	8	8	7	15.5		1	0	1	1		0.777778	1	0.75	1.76389		1.513	0.223	0.42	0.587	1.241	1.502	1.241	1.502		7.87	4.58	8.74	7.90667	11.395	6.82333	11.6667	10.0167
						ConstitutiveKO	V6	16	13	15	28.5		1	2	1	3		0.882353	0.733333	0.875	1.61201		1.513	0.223	0.115	0.132	0.997	1.502	1.392	0.343		13.25	7.64	5.5	5.4	11.41	12.02	8.10333	11.0033		16.6667
						ConstitutiveKO	V12	11	7	13	19		5	8	6	13.5		0.375	-0.0666667	0.368421	0.305044		1.513	0.731	0.701	0.512	1.502	1.513	1.218	1.086		8.06	7.07	6.34	5.09667	12.1367	9.55667	10.6075	12.4533		26.9231
						ConstitutiveKO	W15	12	14	19	29.5		2	4	2	6		0.714286	0.555556	0.809524	1.31746		1.241	0.202	0.343	0.198	1.513	1.502	1.137	0.334		8.8275	4.90333	5.86	6.6	8.90667	11.06	9.83	12.0067		16.6667
						ConstitutiveKO	L11	7	13	6	19.5		0	0	0	0		1	1	1	2		1.137	0.512	0.161	0.272	1.513	0.997	0.782	0.82		10.37	7.81	6.54333	8.54333	9.24333	12.02	9.675	11.7033		38.2353
						ConstitutiveKO	M12	1	2	1	3		0	1	0	1		1	0.333333	1	1.33333		1.241	0.198	0.123	0.42	1.21	1.513	0.669	0.512		9.25667	8.15	5.55	9.475	12.8133	10.3125	8.35333	12.24		33.3333
						ConstitutiveKO	N4	14	5	6	15		3	5	4	8.5		0.647059	0	0.2	0.423529		1.513	0.301	0.132	0.223	1.137	1.502	0.397	1.086		9.815	6.99	4.42	8.15	12.1033	13.4367	11.71	12.57		25
						ConstitutiveKO	N10	12	12	19	27.5		0	0	0	0		1	1	1	2		1.392	0.198	0.512	0.202	1.513	1.513	0.625	0.512		11.395	5.21	6.575	8.37	10.9133	9.94	13.24	14.2		26.6667
						ConstitutiveKO	B8	0	3	1	3.5		0	0	5	2.5							1.086	0.272	0.486	0.223	1.086	0.891	1.086	1.513		10.5133	4.51667	3.4	4.055	10.75	8.17	6.81	9.27667		20
						ConstitutiveKO	B12	5	4	8	10.5		9	3	6	10.5		-0.285714	0.142857	0.142857	0.0714286		1.513	0.247	0.272	0.334	1.502	0.782	1.218	0.82		9.78	4.575	3.52	5.73667	8.98	8.105	6.16	7.1375		29.1667
						ConstitutiveKO	C6	8	4	7	11.5		1	5	1	6		0.777778	-0.111111	0.75	0.652778		1.218	0.397	0.163	0.343	1.086	1.086	1.086	0.966		10.4267	6.28667	6.655	5.8625	9.58333	8.59333	6.525	9.37667		25.9259
						ConstitutiveKO	C14	3	6	9	12		0	3	2	4		1	0.333333	0.636364	1.15152		1.137	0.045	0.625	0.223	1.086	0.433	1.137	1.392		10.1967	5.23333	4.86	4.23	9.33333	11.3333	7.83333	6.87667		31.4286
						ConstitutiveKO	D7	7	12	12	21.5		0	4	0	4		1	0.5	1	1.5		1.513	0.071	0.272	0.074	1.513	0.42	0.731	0.669		9.04	5.39	4.06333	6.29333	8.94667	7.432	7.01333	8.1		9.09091
						ConstitutiveKO	H6	8	9	4	15		2	1	0	2		0.6	0.8	1	1.6		1.392	0.045	0.223	0.272	0.82	0.549	0.42	0.46		9.46667	3.83667	5.58	7.42	8.27	7.68667	7.49333	8.235		20
						ConstitutiveKO	H10	7	6	9	14		4	4	5	8.5		0.272727	0.2	0.285714	0.479221		1.241	0.161	0.343	0.239	0.966	0.82	1.137	0.512		7.55333	3.26333	4.4675	4.83	8.11333	8.49	5.99	7.4975		29.6296
						ConstitutiveKO	I2	9	14	15	26		2	5	5	8.5		0.636364	0.473684	0.5	1.04187		1.513	0.198	0.132	0.091	1.502	0.731	0.071	0.282		8.18	3.82667	5.4175	7.025	8.33667	7.03667	7.5375	7.865		27.2727
						ConstitutiveKO	J15	0	2	5	4.5		2	1	1	2.5		-1	0.333333	0.666667	0.166667		1.218	0.891	0.058	0.239	1.218	1.086	0.183	0.272		8.455	4.58333	3.81333	6.83	9.075	8.45	7.30667	9.145		35.4839
						C57BL/6J	Average	12.2105	13.9474	13.7368	26.9211		2.05263	2.63158	2.36842	4.84211		0.754957	0.721166	0.760363	1.47883		1.40374	0.444684	0.344579	0.782158	1.39553	1.17553	1.17742	1.33442		9.93364	5.90461	5.60934	8.78579	10.4246	10.2745	10.3586	11.6078		34.2352
							SD	6.85224	9.79497	9.95458	17.1369		3.79288	3.49937	3.04066	6.1397		0.228605	0.25202	0.223589	0.376654		0.166612	0.204569	0.156056	0.309199	0.173251	0.264585	0.274102	0.190529		1.12832	1.43347	1.52615	2.6348	1.68112	1.8372	1.96338	2.76438		5.73277
							N	19	19	19	19		19	19	19	19		19	19	19	19		19	19	19	19	19	19	19	19		19	19	19	19	19	19	19	19		17
							SEM	1.57201	2.24712	2.28374	3.93148		0.870147	0.802811	0.697575	1.40854		0.0524456	0.0578174	0.0512948	0.0864104		0.0382233	0.0469313	0.0358018	0.0709351	0.0397466	0.0607	0.0628833	0.0437104		0.258854	0.32886	0.350123	0.604465	0.385675	0.421482	0.450431	0.634193		1.3904
						ConstitutiveKO	Average	7.5	7.875	9.3125	16.2812		1.9375	2.875	2.375	5.03125		0.574657	0.415177	0.682303	1.04366		1.33631	0.29325	0.291312	0.249812	1.26025	1.0525	0.830563	0.723688		9.66161	5.58031	5.16031	6.49484	9.93219	9.60268	8.38677	9.98042		25.7181
							SD	4.84424	4.48516	5.70051	8.7597		2.43499	2.30579	2.36291	3.95588		0.561917	0.357147	0.313684	0.652266		0.161425	0.236758	0.195722	0.113088	0.243742	0.411637	0.405058	0.392624		1.41334	1.54692	1.10948	1.60451	1.52591	1.91439	2.07986	2.31442		7.66327
							N	16	16	16	16		16	16	16	16		15	15	15	15		16	16	16	16	16	16	16	16		16	16	16	16	16	16	16	16		16
							SEM	1.21106	1.12129	1.42513	2.18992		0.608747	0.576447	0.590727	0.988969		0.145086	0.0922148	0.0809929	0.168414		0.0403562	0.0591896	0.0489306	0.0282721	0.0609355	0.102909	0.101264	0.0981561		0.353334	0.38673	0.27737	0.401127	0.381477	0.478598	0.519965	0.578604		1.91582

## Sheet: Figure2_Stats
Figure 2A
	Session Responding
	Mixed Model Analysis
	Fixed Effects
	Type III Tests of Fixed Effectsa
	Source	Numerator df	Denominator df	F	Sig.
	Intercept	1	93.1327	217.481	4.28506e-26
	Day	2	62.646	0.507536	0.604431
	Genotype	1	93.1327	12.0586	0.000783769
	Genotype * Day	2	62.646	0.112091	0.894142
	a. Dependent Variable: Active.
	Pairwise Comparisonsa
	(I) Genotype		Mean Difference (I-J)	Std. Error	df	Sig.c	95% Confidence Interval for Differencec
							Lower Bound	Upper Bound
	C57Bl6/J	CB2KO	5.069*	1.45976	93.1327	0.000783769	2.17034	7.96782
	CB2KO	C57Bl6/J	-5.069*	1.45976	93.1327	0.000783769	-7.96782	-2.17034
	Based on estimated marginal means
	*. The mean difference is significant at the .05 level.
	a. Dependent Variable: Active.
	c. Adjustment for multiple comparisons: Bonferroni.
	Overall Responding
	2-Way ANOVA
	Tests of Between-Subjects Effects
	Dependent Variable:	AUC
	Source	Type III Sum of Squares	df	Mean Square	F	Sig.
	Corrected Model	6117.870a	3	2039.29	18.3111	9.4119e-09
	Intercept	12233.9	1	12233.9	109.85	1.10707e-15
	Sensor	4824.13	1	4824.13	43.3165	8.92507e-09
	Genotype	474.311	1	474.311	4.2589	0.0429812
	Sensor * Genotype	509.27	1	509.27	4.5728	0.0361892
	Error	7350.38	66	111.369
	Total	26212.2	70
	Corrected Total	13468.2	69
	a. R Squared = .454 (Adjusted R Squared = .429)
	Pairwise Comparisons
	Dependent Variable:	AUC
	Sensor			Mean Difference (I-J)	Std. Error	Sig.b	95% Confidence Interval for Differenceb
							Lower Bound	Upper Bound
	Inactive	C57Bl6/J	CB2KO	-0.189145	3.5808	0.958033	-7.33844	6.96015
		CB2KO	C57Bl6/J	0.189145	3.5808	0.958033	-6.96015	7.33844
	Active	C57Bl6/J	CB2KO	10.640*	3.5808	0.00413311	3.4905	17.7891
		CB2KO	C57Bl6/J	-10.640*	3.5808	0.00413311	-17.7891	-3.4905
	Based on estimated marginal means
	*. The mean difference is significant at the 0.05 level.
	b. Adjustment for multiple comparisons: Bonferroni.
Figure 2B
	Heat
	Ipsilateral paw										Contralateral paw
	Mixed Model Analysis										Mixed Model Analysis
	Fixed Effects										Fixed Effects
	Type III Tests of Fixed Effectsa										Type III Tests of Fixed Effectsa
	Source	Numerator df	Denominator df	F	Sig.						Source	Numerator df	Denominator df	F	Sig.
	Intercept	1	81.4177	1360.4	1.39694e-52						Intercept	1	91.5654	2220.81	5.32332e-66
	Genotype	1	81.4177	9.06654	0.00346633						Genotype	1	91.5654	11.1746	0.00120235
	Day	2	54.771	13.3288	1.92092e-05						Day	2	58.5268	3.29037	0.0442377
	Genotype * Day	2	54.771	2.64396	0.0801395						Genotype * Day	2	58.5268	1.03295	0.362354
	a. Dependent Variable: PTipsi.										a. Dependent Variable: PTcontra.
	Pairwise Comparisonsa										Pairwise Comparisonsa
	(I) Genotype		Mean Difference (I-J)	Std. Error	df	Sig.c	95% Confidence Interval for Differencec				(I) Genotype		Mean Difference (I-J)	Std. Error	df	Sig.c	95% Confidence Interval for Differencec
							Lower Bound	Upper Bound									Lower Bound	Upper Bound
	C57Bl6/J	CB2KO	1.021*	0.339223	81.4177	0.00346633	0.346529	1.69632			C57Bl6/J	CB2KO	1.424*	0.42589	91.5654	0.00120235	0.577777	2.26959
	CB2KO	C57Bl6/J	-1.021*	0.339223	81.4177	0.00346633	-1.69632	-0.346529			CB2KO	C57Bl6/J	-1.424*	0.42589	91.5654	0.00120235	-2.26959	-0.577777
	Based on estimated marginal means										Based on estimated marginal means
	*. The mean difference is significant at the .05 level.										*. The mean difference is significant at the .05 level.
	a. Dependent Variable: PTipsi.										a. Dependent Variable: PTcontra.
	c. Adjustment for multiple comparisons: Bonferroni.										c. Adjustment for multiple comparisons: Bonferroni.
	Pairwise Comparisonsa										Pairwise Comparisonsa
	(I) Day		Mean Difference (I-J)	Std. Error	df	Sig.c	95% Confidence Interval for Differencec				(I) Day		Mean Difference (I-J)	Std. Error	df	Sig.c	95% Confidence Interval for Differencec
							Lower Bound	Upper Bound									Lower Bound	Upper Bound
	3	6.00	0.357632	0.340939	65.4251	0.894167	-0.480087	1.19535			3.00	6.00	0.56587	0.466964	65.6388	0.689793	-0.581406	1.71315
		18.00	-1.898*	0.454137	57.5356	0.000302226	-3.01776	-0.77796				18.00	-0.855536	0.539439	60.3409	0.353917	-2.18393	0.472861
	6.00	3.00	-0.357632	0.340939	65.4251	0.894167	-1.19535	0.480087			6.00	3.00	-0.56587	0.466964	65.6388	0.689793	-1.71315	0.581406
		18.00	-2.255*	0.441978	54.4432	1.31136e-05	-3.34726	-1.16371				18.00	-1.421*	0.55423	62.4773	0.0382319	-2.78489	-0.0579191
	18.00	3.00	1.898*	0.454137	57.5356	0.000302226	0.77796	3.01776			18.00	3.00	0.855536	0.539439	60.3409	0.353917	-0.472861	2.18393
		6.00	2.255*	0.441978	54.4432	1.31136e-05	1.16371	3.34726				6.00	1.421*	0.55423	62.4773	0.0382319	0.0579191	2.78489
	Based on estimated marginal means										Based on estimated marginal means
	*. The mean difference is significant at the .05 level.										*. The mean difference is significant at the .05 level.
	a. Dependent Variable: PTipsi.										a. Dependent Variable: PTcontra.
	c. Adjustment for multiple comparisons: Bonferroni.										c. Adjustment for multiple comparisons: Bonferroni.
	Mechanical
	Ipsilateral paw										Contralateral paw
	Mixed Model Analysis										Mixed Model Analysis
	Fixed Effects										Fixed Effects
	Type III Tests of Fixed Effectsa										Type III Tests of Fixed Effectsa
	Source	Numerator df	Denominator df	F	Sig.						Source	Numerator df	Denominator df	F	Sig.
	Intercept	1	93.297	367.046	4.23126e-34						Intercept	1	97.762	1073.16	1.63328e-54
	Genotype	1	93.297	34.4503	6.63847e-08						Genotype	1	97.762	31.6329	1.7699e-07
	Day	2	61.6524	7.76291	0.000984159						Day	2	69.6615	1.0174	0.366843
	Genotype * Day	2	61.6524	11.534	5.55654e-05						Genotype * Day	2	69.6615	5.10285	0.00854871
	a. Dependent Variable: VFipsi.										a. Dependent Variable: VFcontra.
	Pairwise Comparisonsa										Pairwise Comparisonsa
	(I) Genotype		Mean Difference (I-J)	Std. Error	df	Sig.c	95% Confidence Interval for Differencec				(I) Genotype		Mean Difference (I-J)	Std. Error	df	Sig.c	95% Confidence Interval for Differencec
							Lower Bound	Upper Bound									Lower Bound	Upper Bound
	C57Bl6/J	CB2KO	.246*	0.0418579	93.297	6.63847e-08	0.162564	0.3288			C57Bl6/J	CB2KO	.360*	0.0640444	97.762	1.7699e-07	0.233108	0.487304
	CB2KO	C57Bl6/J	-.246*	0.0418579	93.297	6.63847e-08	-0.3288	-0.162564			CB2KO	C57Bl6/J	-.360*	0.0640444	97.762	1.7699e-07	-0.487304	-0.233108
	Based on estimated marginal means										Based on estimated marginal means
	*. The mean difference is significant at the .05 level.										*. The mean difference is significant at the .05 level.
	a. Dependent Variable: VFipsi.										a. Dependent Variable: VFcontra.
	c. Adjustment for multiple comparisons: Bonferroni.										c. Adjustment for multiple comparisons: Bonferroni.
											Pairwise Comparisonsa
	Day			Mean Difference (I-J)	Std. Error	df	Sig.c	95% Confidence Interval for Differencec			Day			Mean Difference (I-J)	Std. Error	df	Sig.c	95% Confidence Interval for Differencec
								Lower Bound	Upper Bound									Lower Bound	Upper Bound
	3.00	C57Bl6/J	CB2KO	0.151434	0.0745755	33	0.0504158	-0.000290824	0.303159		3.00	C57Bl6/J	CB2KO	0.123026	0.115168	33	0.293169	-0.111286	0.357338
		CB2KO	C57Bl6/J	-0.151434	0.0745755	33	0.0504158	-0.303159	0.000290824			CB2KO	C57Bl6/J	-0.123026	0.115168	33	0.293169	-0.357338	0.111286
	6.00	C57Bl6/J	CB2KO	0.0532664	0.0594483	33	0.376736	-0.067682	0.174215		6.00	C57Bl6/J	CB2KO	.347*	0.115345	33	0.00501424	0.112187	0.58153
		CB2KO	C57Bl6/J	-0.0532664	0.0594483	33	0.376736	-0.174215	0.067682			CB2KO	C57Bl6/J	-.347*	0.115345	33	0.00501424	-0.58153	-0.112187
	18.00	C57Bl6/J	CB2KO	.532*	0.0816892	33	2.12563e-07	0.366148	0.698543		18.00	C57Bl6/J	CB2KO	.611*	0.10172	33	9.53227e-07	0.403783	0.817684
		CB2KO	C57Bl6/J	-.532*	0.0816892	33	2.12563e-07	-0.698543	-0.366148			CB2KO	C57Bl6/J	-.611*	0.10172	33	9.53227e-07	-0.817684	-0.403783
	Based on estimated marginal means										Based on estimated marginal means
	*. The mean difference is significant at the .05 level.										*. The mean difference is significant at the .05 level.
	a. Dependent Variable: VFipsi.										a. Dependent Variable: VFcontra.
	c. Adjustment for multiple comparisons: Bonferroni.										c. Adjustment for multiple comparisons: Bonferroni.
	Pairwise Comparisonsa										Pairwise Comparisonsa
	Genotype			Mean Difference (I-J)	Std. Error	df	Sig.c	95% Confidence Interval for Differencec			Genotype			Mean Difference (I-J)	Std. Error	df	Sig.c	95% Confidence Interval for Differencec
								Lower Bound	Upper Bound									Lower Bound	Upper Bound
	C57BL6/J	3.00	6.00	0.100105	0.0644825	62.8761	0.376728	-0.0585034	0.258714		C57BL6/J	3.00	6.00	-0.00189474	0.110207	65.9998	1	-0.27262	0.268831
			18.00	-.337*	0.0747862	65.4596	8.18769e-05	-0.521228	-0.15372				18.00	-0.158895	0.103892	65.0079	0.393031	-0.414209	0.0964197
		6.00	3.00	-0.100105	0.0644825	62.8761	0.376728	-0.258714	0.0585034			6.00	3.00	0.00189474	0.110207	65.9998	1	-0.268831	0.27262
			18.00	-.438*	0.0683093	60.2974	7.52813e-08	-0.605798	-0.26936				18.00	-0.157	0.103981	64.9839	0.407758	-0.412537	0.0985371
		18.00	3.00	.337*	0.0747862	65.4596	8.18769e-05	0.15372	0.521228			18.00	3.00	0.158895	0.103892	65.0079	0.393031	-0.0964197	0.414209
			6.00	.438*	0.0683093	60.2974	7.52813e-08	0.26936	0.605798				6.00	0.157	0.103981	64.9839	0.407758	-0.0985371	0.412537
	CB2KO	3.00	6.00	0.0019375	0.0702682	62.8761	1	-0.170902	0.174777		CB2KO	3	6.00	0.221937	0.120095	65.9998	0.207243	-0.0730789	0.516954
			18.00	0.0434375	0.0814964	65.4596	1	-0.156804	0.243679				18.00	.329*	0.113213	65.0079	0.0150696	0.05059	0.607035
		6.00	3.00	-0.0019375	0.0702682	62.8761	1	-0.174777	0.170902			6.00	3.00	-0.221937	0.120095	65.9998	0.207243	-0.516954	0.0730789
			18.00	0.0415	0.0744383	60.2974	1	-0.141812	0.224812				18.00	0.106875	0.113311	64.9839	1	-0.17159	0.38534
		18.00	3.00	-0.0434375	0.0814964	65.4596	1	-0.243679	0.156804			18.00	3.00	-.329*	0.113213	65.0079	0.0150696	-0.607035	-0.05059
			6.00	-0.0415	0.0744383	60.2974	1	-0.224812	0.141812				6.00	-0.106875	0.113311	64.9839	1	-0.38534	0.17159
	Based on estimated marginal means										Based on estimated marginal means
	*. The mean difference is significant at the .05 level.										*. The mean difference is significant at the .05 level.
	a. Dependent Variable: VFipsi.										a. Dependent Variable: VFcontra.
	c. Adjustment for multiple comparisons: Bonferroni.										c. Adjustment for multiple comparisons: Bonferroni.
Fig.2C	Anxiety-like behavior
	T-test
	Independent Samples Test
			Levene's Test for Equality of Variances		t-test for Equality of Means
			F	Sig.	t	df	Sig. (2-tailed)	Mean Difference	Std. Error Difference	95% Confidence Interval of the Difference
										Lower	Upper
	Entries	Equal variances assumed	1.37518	0.249857	3.62989	31	0.0010097	8.51706	2.34636	3.73161	13.3025
		Equal variances not assumed			3.59797	27.7463	0.00123247	8.51706	2.36719	3.6661	13.368
