# Supplementary material for: Protective role of neuronal and lymphoid cannabinoid CB2 receptors in neuropathic pain
Source: eLife journal article supplement (doi:10.7554/elife.55582), 2020-07-20
Supplement: supp [file elife-55582-supp-v1.zip › elife_poa_e55582_Figure_3_figure_supplement_1_source_data_1.xlsx]

## Sheet: Figure 3-figure suppl2_RawData
							Von Frey									Von Frey													Plantar								Plantar
							Ipsilateral Paw									Contralateral Paw						Von Frey							Ipsilateral Paw								Contralateral Paw					Plantar
				Mouse	Genotype	Surgery	Baseline Response	JWH133 0 mg/kg	JWH133 5 mg/kg	JWH133 10 mg/kg	After response		Mouse	Genotype	Surgery	Baseline Response	JWH133 0 mg/kg	JWH133 5 mg/kg	JWH133 10 mg/kg	After response		Avg Baseline				Mouse	Genotype	Surgery	Baseline Response	JWH133 0 mg/kg	JWH133 5 mg/kg	JWH133 10 mg/kg		Mouse	Genotype	Surgery	Baseline Response	JWH133 0 mg/kg	JWH133 5 mg/kg	JWH133 10 mg/kg		Avg Baseline
			1	B2629	wt/wt	Sham	1.241	1.502	0.966	1.513	1.513		B2629	wt/wt	Sham	1.513	1.392	1.513	1.241	1.502		1.377				B2629	wt/wt	Sham	9.5	6.18333	4.88667	7.43667		B2629	wt/wt	Sham	9.53333	7.28667	8.08667	7.62667		9.51667
			2	B2631	wt/wt	Sham	1.513	1.241	1.218	0.891	1.392		B2631	wt/wt	Sham	1.502	1.241	1.241	1.502	1.513		1.5075				B2631	wt/wt	Sham	7.85333	9.39333	7.23333	7.55		B2631	wt/wt	Sham	7.97667	7.64	7.42	7.24333		7.915
			3	B2676	wt/wt	Sham	1.513	1.392	1.218	1.392	1.086		B2676	wt/wt	Sham	1.513	1.137	1.502	0.997	1.502		1.513				B2676	wt/wt	Sham	6.08	11.9433	10.1567	9.22333		B2676	wt/wt	Sham	12.59	9.1	11.2633	8.86		9.335
			4	B2738	wt/wt	Sham	1.513	1.502	1.513	1.007	1.241		B2738	wt/wt	Sham	1.513	1.513	0.933	1.086	1.137		1.513				B2738	wt/wt	Sham	9.04333	6.01	9.72333	11.6067		B2738	wt/wt	Sham	12.1233	6.85667	9.64	11.3167		10.5833
			5	B2747	wt/wt	Sham	1.513	1.241	1.137	1.241	1.218		B2747	wt/wt	Sham	1.513	1.502	0.933	1.513	1.086		1.513				B2747	wt/wt	Sham	8.83	7.99	6.84667	9.4		B2747	wt/wt	Sham	6.14667	6.735	6.66667	7.01667		7.48833
			6	B2748	wt/wt	Sham	1.513	1.218	1.007	1.137	1.137		B2748	wt/wt	Sham	1.241	1.241	1.218	1.513	1.513		1.377				B2748	wt/wt	Sham	9.45	7.165	6.28333	9.36333		B2748	wt/wt	Sham	8.84	6.75333	8.43667	7.13667		9.145
			7	B2750	wt/wt	Sham	1.513	1.513	1.513	1.241	1.513		B2750	wt/wt	Sham	1.502	1.502	1.392	1.502	0.933		1.5075				B2750	wt/wt	Sham	13.0733	7.51	5.89667	10.0633		B2750	wt/wt	Sham	8.27333	7.79333	6.12	12.09		10.6733
			8	B2722	wt/wt	Sham	1.513	1.513	1.502	1.513	1.513		B2722	wt/wt	Sham	1.513	1.218	1.513	1.502	1.218		1.513				B2722	wt/wt	Sham	8.04333	10.79	6.38	7.47		B2722	wt/wt	Sham	7.53333	9.73333	9.14333	8.63		7.78833
			9	B2604	wt/wt	PSNL	1.392	0.111	0.625	0.997	0.334		B2604	wt/wt	PSNL	1.513	1.513	0.891	1.513	1.513		1.4525				B2604	wt/wt	PSNL	13.2833	7.50667				B2604	wt/wt	PSNL	12.1267	11.17	10.6267	6		12.705
			10	B2605	wt/wt	PSNL	1.513	0.579	0.701	1.513	0.625		B2605	wt/wt	PSNL	1.513	1.241	1.086	1.513	0.82		1.513				B2605	wt/wt	PSNL	11.06	5.22333	6.47	7.46667		B2605	wt/wt	PSNL	11.4967	11.5033	7.64667	12.9433		11.2783
			11	B2606	wt/wt	PSNL	1.392	0.433	1.137	0.933	0.891		B2606	wt/wt	PSNL	1.513	1.392	0.997	1.502	0.997		1.4525				B2606	wt/wt	PSNL	8.24	5.58667	4.08667	5.86667		B2606	wt/wt	PSNL	12.41	11.64	11.3433	7.30667		10.325
			12	B2727	wt/wt	PSNL	1.513	0.669	0.997	0.966	0.327		B2727	wt/wt	PSNL	1.502	1.513	1.392	1.502	1.392		1.5075				B2727	wt/wt	PSNL	9.53667	5.37667	5.92	6.29333		B2727	wt/wt	PSNL	8.84	10.2933	4.76333	5.74		9.18833
			13	B2728	wt/wt	PSNL	1.513	0.587	0.997	0.997	0.765		B2728	wt/wt	PSNL	1.513	1.137	1.513	1.392	1.513		1.513				B2728	wt/wt	PSNL	8.40667	6.42667	5.6	5.16667		B2728	wt/wt	PSNL	9.96333	9.41667	12.8133	11.52		9.185
			14	B2679	wt/wt	PSNL	1.241	0.433	1.137	1.502	0.825		B2679	wt/wt	PSNL	1.513	0.997	1.241	1.513	1.392		1.377				B2679	wt/wt	PSNL	7.53333	4.57333	5.25667	6.09		B2679	wt/wt	PSNL	10.4767	6.9	11.4733	10.07		9.005
			15	B2740	wt/wt	PSNL	1.086	0.731	0.997	1.086	0.891		B2740	wt/wt	PSNL	1.241	1.513	1.241	1.513	1.218		1.1635				B2740	wt/wt	PSNL	9.309	5.80667	4.995	8.49333		B2740	wt/wt	PSNL	10.45	10.99	6.84333	13.68		9.8795
			16	B2741	wt/wt	PSNL	1.502	0.579	0.997	1.218	0.161		B2741	wt/wt	PSNL	1.502	1.392	0.731	0.82	0.549		1.502				B2741	wt/wt	PSNL	8.10333	6.15667	6.31333	6.92		B2741	wt/wt	PSNL	10.2867	10.14	10.5467	9.69333		9.195
			17	B2622	wt/wt	PSNL	1.513	0.864	0.966	1.392	0.486		B2622	wt/wt	PSNL	1.502	0.731	1.502	1.513	1.241		1.5075				B2622	wt/wt	PSNL	13.7433	5.46333	5.03667	8.18		B2622	wt/wt	PSNL	9.18333	10.8867	10.59	6.52667		11.4633
			18	B2623	wt/wt	PSNL	1.513	0.272	0.966	0.864	0.334		B2623	wt/wt	PSNL	1.513	1.502	1.392	1.513	1.241		1.513				B2623	wt/wt	PSNL	9.89	3.85333	6.3	4.94333		B2623	wt/wt	PSNL	6.31	5.18	6.01333	7.30333		8.1
			19	B2754	wt/wt	PSNL	1.513	0.579	0.825	0.864	0.625		B2754	wt/wt	PSNL	1.241	1.513	0.891	1.392	1.392		1.377				B2754	wt/wt	PSNL	6.97	4.40667	6.10333	5.72333		B2754	wt/wt	PSNL	7.23333	5.36333	7.47333	4.80667		7.10167
			20	B2617	wt/wt	PSNL	1.392	0.198	0.549	0.825	0.669		B2617	wt/wt	PSNL	1.392	1.218	1.502	1.086	1.086		1.392				B2617	wt/wt	PSNL	8.38667	5.95667	6.74	6.18667		B2617	wt/wt	PSNL	10.8267	9.11	7.82667	8.99333		9.60667
			21	B2725	wt/tg	Sham	1.513	1.513	1.392	1.513	1.513		B2725	wt/tg	Sham	1.502	1.392	1.241	1.513	1.137		1.5075				B2725	wt/tg	Sham	8.47333	7.58	6.03	8.67667		B2725	wt/tg	Sham	8.55667	10.0867	11.41	10.3533		8.515
			22	B2726	wt/tg	Sham	1.392	1.086	1.218	0.933	1.241		B2726	wt/tg	Sham	1.392	1.513	1.241	1.513	1.241		1.392				B2726	wt/tg	Sham	10.98	10.9067	8.86	12.2533		B2726	wt/tg	Sham	10.3	8.97667	6.01	8.76		10.64
			23	B2630	wt/tg	Sham	1.502	0.997	1.513				B2630	wt/tg	Sham	1.392	1.502					1.447				B2630	wt/tg	Sham	7.10333	9.26667				B2630	wt/tg	Sham	8.21333	8.76				7.65833
			24	B2633	wt/tg	Sham	1.392	1.086	1.218	0.997	1.513		B2633	wt/tg	Sham	1.218	1.502	1.218	0.997	0.765		1.305				B2633	wt/tg	Sham	9.71	5.12667	9.16	8.9		B2633	wt/tg	Sham	12.6167	9.48	10.3667	9.04		11.1633
			25	B2675	wt/tg	Sham	1.392	1.513	1.241	1.392	0.997		B2675	wt/tg	Sham	1.241	1.392	1.241	1.007	0.891		1.3165				B2675	wt/tg	Sham	8.6	8.82667	10.6533	11.25		B2675	wt/tg	Sham	7.13333	8.14333	13.1867	12.1667		7.86667
			26	B2737	wt/tg	Sham	1.218	1.137	1.502	1.137	0.933		B2737	wt/tg	Sham	1.513	1.241	1.502	1.392	1.502		1.3655				B2737	wt/tg	Sham	8.54333	9.41667	10.6	12.5133		B2737	wt/tg	Sham	7.42333	14.23	10.72	9.56		7.98333
			27	B2739	wt/tg	Sham	1.513	1.392	1.392	1.392	1.241		B2739	wt/tg	Sham	1.502	1.513	1.137	1.218	1.241		1.5075				B2739	wt/tg	Sham	9.6	9.92	15.3933	13.76		B2739	wt/tg	Sham	10.69	6.46333	10.3033	15.3133		10.145
			28	B2749	wt/tg	Sham	1.392	0.997	1.513	1.513	1.241		B2749	wt/tg	Sham	1.513	1.392	1.513	1.392	1.513		1.4525				B2749	wt/tg	Sham	7.31	10.3533	9.59333	10.28		B2749	wt/tg	Sham	8.65667	6.82667	8.27333	7.12333		7.98333
			29	B2691	wt/tg	Sham	1.513	1.392	1.513	1.513	1.218		B2691	wt/tg	Sham	1.241	1.241	1.513	1.086	1.502		1.377				B2691	wt/tg	Sham	7.85	12.5967	5.96667	8.05333		B2691	wt/tg	Sham	10.6	9.41333	5.08667	8.54333		9.225
			30	B2692	wt/tg	Sham	1.513	1.218	1.218	1.086	1.513		B2692	wt/tg	Sham	1.513	1.392	1.241	1.392	1.392		1.513				B2692	wt/tg	Sham	10.47	14.3167	6.92333	11.3367		B2692	wt/tg	Sham	10.8233	10.9733	10.5833	8		10.6467
			31	B2693	wt/tg	Sham	1.086	0.933	1.241	1.137	0.997		B2693	wt/tg	Sham	1.218	1.513	1.513	1.137	1.392		1.152				B2693	wt/tg	Sham	10.4833	6.00667	10.7333	6.72333		B2693	wt/tg	Sham	9.44	7.22333	9.17333	9.82333		9.96167
			32	B2616	wt/tg	Sham	1.392	1.502	0.625	0.997	0.82		B2616	wt/tg	Sham	0.933	1.513	0.997	0.997	0.82		1.1625				B2616	wt/tg	Sham	9.39333	7.85333	9.72333	10.0267		B2616	wt/tg	Sham	9.69	8.76667	13.1033	9.81667		9.54167
			33	B2723	wt/tg	Sham	1.513	1.502	1.086	1.392	1.502		B2723	wt/tg	Sham	1.513	1.086	1.218	1.086	1.502		1.513				B2723	wt/tg	Sham	10.2633	11.5267	11.09	8.67667		B2723	wt/tg	Sham	7.99333	8.98333	16.99	8.33333		9.12833
			34	B2724	wt/tg	Sham	1.241	1.241	1.513	1.218	1.218		B2724	wt/tg	Sham	1.513	1.513	0.933	1.241	1.513		1.377				B2724	wt/tg	Sham	8.48333	6.48333	8.43667	6.01667		B2724	wt/tg	Sham	10.2967	7.29333	13.9533	8.47333		9.39
			35	B2655	wt/tg	PSNL	1.513	0.512	0.891	0.933	0.625		B2655	wt/tg	PSNL	1.392	1.513	0.997	1.241	0.993		1.4525				B2655	wt/tg	PSNL	9.39667	4.69	5.77	11.68		B2655	wt/tg	PSNL	10.5567	6.30333	9.61667	8.37333		9.97667
			36	B2656	wt/tg	PSNL	1.392	0.111	0.587	0.701	0.864		B2656	wt/tg	PSNL	1.392	1.502	0.864	1.392	1.502		1.392				B2656	wt/tg	PSNL	7.34	3.77333	6.89333	4.15		B2656	wt/tg	PSNL	6.84667	7.07	8.95	7.69333		7.09333
			37	B2647	wt/tg	PSNL	1.513	0.42	1.218	1.392	0.343		B2647	wt/tg	PSNL	1.241	1.086	0.933	1.241	1.513		1.377				B2647	wt/tg	PSNL	9.29333	5.65	5.56667	7.195		B2647	wt/tg	PSNL	12.2567	8.53333	5.69667	6.995		10.775
			38	B2648	wt/tg	PSNL	1.513	0.625	0.891	1.086	0.45		B2648	wt/tg	PSNL	1.513	1.241	1.241	0.997	0.966		1.513				B2648	wt/tg	PSNL	8.88	3.54	5.91	6.31		B2648	wt/tg	PSNL	12.43	7.67667	10.4433	9.70667		10.655
			39	B2649	wt/tg	PSNL	1.137	0.731	0.701	1.086	0.397		B2649	wt/tg	PSNL	1.513	1.241	1.392	1.513	1.392		1.325				B2649	wt/tg	PSNL	10.3867	5.45667	4.33333	5.05667		B2649	wt/tg	PSNL	12.86	7.53333	6.46	14.53		11.6233
			40	B2730	wt/tg	PSNL	1.513	0.343	0.864	1.241	0.765		B2730	wt/tg	PSNL	1.513	1.392	1.137	1.241			1.513				B2730	wt/tg	PSNL	6.78333	4.23	4.37	6.36333		B2730	wt/tg	PSNL	10.67	6.08	9.1	7.90667		8.72667
			41	B2731	wt/tg	PSNL	1.392	0.587	1.086	0.966	0.512		B2731	wt/tg	PSNL	1.502	1.392	0.997	1.513			1.447				B2731	wt/tg	PSNL	7.02333	5.34	11.1533	7.62		B2731	wt/tg	PSNL	8.64333	4.60667	7.52333	6.54333		7.83333
			42	B2619	wt/tg	PSNL	1.513	0.709	0.579	0.625	0.587		B2619	wt/tg	PSNL	1.392	1.241	0.579	0.933	0.731		1.4525				B2619	wt/tg	PSNL	15.2133	5.58333	7.5	7.46		B2619	wt/tg	PSNL	8.47333	6.54333	12.8133	8.04		11.8433
			43	B2717	wt/tg	PSNL	1.513	0.272	1.086	1.392	0.669		B2717	wt/tg	PSNL	1.513	1.241	1.241	1.502	1.513		1.513				B2717	wt/tg	PSNL	8.06	3.73333	6.09333	9.32333		B2717	wt/tg	PSNL	6.75	8.73	12.3133	9.87333		7.405
			44	B2718	wt/tg	PSNL	1.086	0.272	0.825	1.241	0.765		B2718	wt/tg	PSNL	0.933	1.086	1.086	1.502	0.825		1.0095				B2718	wt/tg	PSNL	8.99333	4.48	6.44	7.29		B2718	wt/tg	PSNL	6.40667	8.18667	6.17333	6.16		7.7
			45	B2677	wt/tg	PSNL	1.513	0.82	1.392	0.966	0.669		B2677	wt/tg	PSNL	1.513	1.502	1.513	1.392	1.502		1.513				B2677	wt/tg	PSNL	15.7367	4.96667	6.31667	7.20667		B2677	wt/tg	PSNL	12.4367	8.03333	7.25667	7.40667		14.0867
			46	B2678	wt/tg	PSNL	1.241	0.272	0.669	1.007	0.42		B2678	wt/tg	PSNL	1.392	0.89	1.513	1.218	1.502		1.3165				B2678	wt/tg	PSNL	7.95667	4.27	4.95667	3.63667		B2678	wt/tg	PSNL	11.47	9.76	8.01667	13.2133		9.71333
			47	B2680	wt/tg	PSNL	1.513	0.701	0.997	1.392	0.334		B2680	wt/tg	PSNL	1.513	0.966	1.502	1.513	1.513		1.513				B2680	wt/tg	PSNL	13.7867	4.83667	10.38	10.02		B2680	wt/tg	PSNL	9.24333	5.92	6.92	9.58333		11.515
			48	B2681	wt/tg	PSNL							B2681	wt/tg	PSNL							0				B2681	wt/tg	PSNL	13.2433	4.54667	6.40333			B2681	wt/tg	PSNL	6.47	6.68	7.90333			9.85667
			49	B2621	wt/tg	PSNL	1.392	0.091	1.137	0.891	0.512		B2621	wt/tg	PSNL	1.513	0.701	1.086	1.502	1.513		1.4525				B2621	wt/tg	PSNL	5.92667	3.56333	4.86	6.1		B2621	wt/tg	PSNL	7.15333	5.52667	8.31333	3.7		6.54
			50	B2672	wt/tg	PSNL	1.513	0.183	0.891	1.513	0.966		B2672	wt/tg	PSNL	1.513	1.513	1.137	1.513	1.513		1.513				B2672	wt/tg	PSNL	8.76333	4.61333	7.32	9.15333		B2672	wt/tg	PSNL	7.98333	10.9067	6.38667	11.395		8.37333
			51	B2673	wt/tg	PSNL	1.241	0.272	1.241	0.966	0.272		B2673	wt/tg	PSNL	1.513	0.864	1.137	1.086	1.086		1.377				B2673	wt/tg	PSNL	5.80667	3.81667	6.095	4.85333		B2673	wt/tg	PSNL	8.13333	13.4867	9.705	11.8233		6.97
			52	B2674	wt/tg	PSNL	1.513	0.42	0.512	0.891	0.42		B2674	wt/tg	PSNL	1.392	1.392	1.513	1.502	1.513		1.4525				B2674	wt/tg	PSNL	12.5467	5.81	6.54	6.81667		B2674	wt/tg	PSNL	8.8	14.98	7.70333	5.41		10.6733
			53	B2618	wt/tg	PSNL	1.137	0.17	0.864	0.864	0.731		B2618	wt/tg	PSNL	0.997	0.966	1.137	1.241	0.731		1.067				B2618	wt/tg	PSNL	9.36		7.4	6.9		B2618	wt/tg	PSNL	7.86	8.24333	13.2567	10.9967		8.61
				wt/wt	Sham	Average	1.479	1.39025	1.25925	1.24188	1.32662		wt/wt	Sham	Average	1.47625	1.34325	1.28062	1.357	1.3005		1.47762				wt/wt	Sham	Average	8.98417	8.37312	7.17583	9.01417		wt/wt	Sham	Average	9.12708	7.73729	8.34708	8.74		9.05562
						N	8	8	8	8	8				N	8	8	8	8	8		8						N	8	8	8	8				N	8	8	8	8		8
						SD	0.0961665	0.135928	0.225414	0.226411	0.177872				SD	0.0951852	0.151531	0.243951	0.216546	0.234862		0.0621535						SD	1.99391	2.15006	1.84365	1.4713				SD	2.22621	1.12155	1.67029	1.96062		1.23131
						SEM	0.034	0.0480579	0.0796958	0.0800485	0.0628874				SEM	0.033653	0.0535743	0.0862498	0.0765604	0.0830364		0.0219746						SEM	0.704954	0.760162	0.651828	0.520183				SEM	0.787084	0.396527	0.590538	0.693185		0.435335
				wt/wt	PSNL	Average	1.42358	0.502917	0.907833	1.09642	0.57775		wt/wt	PSNL	Average	1.45483	1.30517	1.19825	1.39767	1.19617		1.43921				wt/wt	PSNL	Average	9.53853	5.52806	5.71106	6.48455		wt/wt	PSNL	Average	9.96694	9.38278	8.99667	8.71528		9.75274
						N	12	12	12	12	12				N	12	12	12	12	12		12						N	12	12	11	11				N	12	12	12	12		12
						SD	0.13345	0.215164	0.243017	0.214067	0.237986				SD	0.177261	0.133957	0.192685	0.193127	0.278257		0.119816						SD	1.22384	2.58032	2.48648	2.30732				SD	1.5398	1.97859	3.22257	2.11305		1.14887
						SEM	0.0385236	0.0621125	0.0701531	0.0617957	0.0687006				SEM	0.0511708	0.0386702	0.0556233	0.0557509	0.0803258		0.0345878						SEM	0.353292	0.744874	0.749702	0.695684				SEM	0.444501	0.57117	0.930274	0.609984		0.33165
				wt/tg	Sham	Average	1.398	1.25064	1.29893	1.24769	1.22669		wt/tg	Sham	Average	1.37171	1.4075	1.26985	1.22854	1.26238		1.38486				wt/tg	Sham	Average	9.09024	9.29857	9.4741	9.88205		wt/tg	Sham	Average	9.45952	8.97286	10.7046	9.63897		9.27488
						N	14	14	14	13	13				N	14	14	13	13	13		14						N	14	14	13	13				N	14	14	13	13		14
						SD	0.13345	0.215164	0.243017	0.214067	0.237986				SD	0.177261	0.133957	0.192685	0.193127	0.278257		0.119816						SD	1.22384	2.58032	2.48648	2.30732				SD	1.5398	1.97859	3.22257	2.11305		1.14887
						SEM	0.0356659	0.057505	0.0649491	0.0593714	0.0660054				SEM	0.047375	0.0358016	0.0534412	0.0535637	0.0771745		0.0320221						SEM	0.327085	0.689619	0.689626	0.639936				SEM	0.411528	0.528801	0.893779	0.586054		0.307048
				wt/tg	PSNL	Average	1.39711	0.417278	0.912833	1.06406	0.572278		wt/tg	PSNL	Average	1.40278	1.20717	1.16694	1.33567	1.26925		1.32626				wt/tg	PSNL	Average	9.71035	4.60556	6.54219	7.06306		wt/tg	PSNL	Average	9.23386	8.14737	8.66061	8.85278		9.47211
						N	18	18	18	18	18				N	18	18	18	18	16		19						N	19	18	19	18				N	19	19	19	18		19
						SD	0.156286	0.231794	0.247844	0.249888	0.197057				SD	0.176783	0.25301	0.254348	0.192761	0.317565		0.351476						SD	3.01345	0.748435	1.75979	2.04797				SD	2.22584	2.62938	2.24196	2.79804		2.02539
						SEM	0.0368369	0.0546344	0.0584173	0.0588992	0.0464467				SEM	0.041668	0.059635	0.0599504	0.0454341	0.0793911		0.0806342						SEM	0.691332	0.176408	0.403724	0.482711				SEM	0.510644	0.60322	0.514342	0.659505		0.464657
					wt/wt	Average	1.44575							wt/wt	Average	1.4634					wt/wt	1.45457					wt/wt	Average	9.31678						wt/wt	Average	9.631				wt/wt	9.47389
						N	20								N	20						20						N	20							N	20					20
						SD	0.122236								SD	0.0994709						0.0888725						SD	2.058							SD	1.98832					1.42442
						SEM	0.0273327								SEM	0.0222424						0.0198725						SEM	0.460183							SEM	0.444603					0.318511
								t test	0.220493								t test	0.0902035					t test	0.111265						t test	0.841155							t test	0.589354				t test	0.850855
					wt/tg	Average	1.3975							wt/tg	Average	1.38919					wt/tg	1.35112					wt/tg	Average	9.44727						wt/tg	Average	9.3296				wt/tg	9.38843
						N	32								N	32						33						N	33							N	33					33
						SD	0.14444								SD	0.174814						0.276017						SD	2.41108							SD	1.93981					1.68923
						SEM	0.0255336								SEM	0.0309031						0.0480485						SEM	0.419716							SEM	0.337678					0.294057
