# Supplementary material for: Protective role of neuronal and lymphoid cannabinoid CB2 receptors in neuropathic pain
Source: eLife journal article supplement (doi:10.7554/elife.55582), 2020-07-20
Supplement: supp [file elife-55582-supp-v1.zip › elife_poa_e55582_Figure_3_figure_supplement_2_source_data_1.xlsx]

## Sheet: Figure 3-figure suppl1_RawData
		SelfAdmin	Von Frey	Plantar	Plus Maze
		N	N	N	N
Cre Neg		36	34	35	35
SynCrePOSITIVE		20	20	20	19
LysMCrePOSITIVE		19	18	18	18
										Figure 3-figure supplement 1A																										Figure 3-figure supplement 1B
										JWH133 Selfadministration																										Food Selfadministration
										Active JWH133													Inactive JWH133													Active Food						Inactive Food
						Genotype	Mouse		Surgery	day1	day2	day3	day4	day5	day6	day7	day8	day9	day10	day11	day12		day1	day2	day3	day4	day5	day6	day7	day8	day9	day10	day11	day12		day1	day2	day3	day4	day5		day1	day2	day3	day4	day5
						Cre Neg	V3		PSNL	6	9	6	9	2	2	1	5	4	10	13	8		0	0	0	0	0	0	1	0	2	1	0	0		44	30	54	55	35		9	6	6	7	3
						Cre Neg	V4		PSNL	7	6	10	9	15	10	7	10	1	3	2	6		2	4	3	0	8	1	0	0	2	0	1	0		44	69	65	66	53		13	4	3	3	2
						Cre Neg	V10		PSNL	18	13	20	19	25	18	25	30	16	16	15	16		5	4	6	3	4	1	1	3	7	10	10	3		46	58	55	52	46		9	4	5	3	3
						Cre Neg	W1		PSNL	4	7	7	2	1	3	1	0	3	1	1	3		0	1	0	0	0	0	2	0	1	0	0	1		18	37	32	24	38		11	3	4	1	1
						Cre Neg	W7		PSNL	6	12	3	2	2	0	6	1	0	2	0	1		1	0	1	0	1	3	1	5	3	2	1	1		19	32	42	24	20		18	0	0	1	1
						Cre Neg	W8		PSNL	5	1	0	4	9	8	11	7	8	1	15	31		0	0	2	1	1	1	2	0	0	0	0	0		26	49	52	35	58		13	7	2	2	2
						Cre Neg	W13		PSNL	0	15	9	6	8	9	8	13	8	15	14	28		0	18	4	3	9	3	5	5	3	6	8	5		27	16	18	7	13		10	4	5	2	3
						Cre Neg	W14		PSNL	13	12	8	11	4	3	4	2	3	3	14	7		2	7	1	3	1	0	0	0	1	3	7	5		33	17	42	38	58		11	1	0	1	1
						Cre Neg	L4		PSNL	21	19	8	6	2	5	7	7	10	4	6	8		5	3	1	1	0	0	0	0	0	0	5	0		40	55	64	65	68		15	3	8	1	2
						Cre Neg	L10		PSNL	9	4	7	1	3	9	4	5	2	1	3	1		0	2	3	1	0	4	3	0	1	0	1	0		47	41	46	39	37		19	4	0	0	7
						Cre Neg	L13		PSNL	9	16	5	3	2	3	5	6	4	9	8	8		3	4	5	1	1	15	1	2	2	3	5	4		25	31	79	67	75		14	10	24	10	36
						Cre Neg	M3		PSNL	7	12	4	7	6	9	10	9	14	6	13	10		2	0	0	0	1	0	1	2	0	1	0	4		41	25	59	50	70		22	4	4	9	11
						Cre Neg	N1		PSNL	7	9	9	5	7	5	10	11	13	3	4	5		0	0	2	0	2	1	0	0	1	0	0	0		47	40	60	59	52		17	0	2	3	0
						Cre Neg	N2		PSNL	28	38	21	4	6	15	30	37	39	32	29	30		2	7	4	0	0	2	5	2	5	5	4	5		52	58	57	67	81		8	6	7	4	2
						Cre Neg	N5		PSNL	16	17	2	1	1	3	3	4	2	1	1	1		3	2	1	0	0	1	2	1	0	0	0	0		32	21	33	50	52		9	2	0	1	4
						Cre Neg	N6		PSNL	23	26	5	5	4	14	13	12	14	7	3	5		0	4	1	0	0	3	0	0	0	3	1	0		26	53	52	62	49		10	7	13	3	5
						Cre Neg	N14		PSNL	4	4	9	18	13	7	5	9	10	10	5	7		3	0	2	0	0	2	0	2	2	0	0	1		6	1	1	1	11		13	0	4	2	5
						Cre Neg	B11		PSNL	27	10	16	6	3	3	2	4	1	6	5	3		0	0	2	1	1	0	0	0	1	0	0	0		34	16	29	40	34		21	6	6	0	3
						Cre Neg	C7		PSNL	15	13	14	12	7	7	4	8	4	2	2	2		5	9	1	6	1	2	0	3	1	5	0	0		13	0	14	31	45		14	1	3	10	5
						Cre Neg	G3		PSNL	13	5	4	3	4	9	4	3	7	18	5	3		5	3	2	1	0	0	0	0	0	0	0	0		10	3	4	16	41		13	4	4	0	8
						Cre Neg	H7		PSNL	9	10	8	3	3	6	5	12	7	4	9	3		7	5	2	2	0	1	2	6	1	0	1	2		51	62	38	56	57		17	7	2	1	6
						Cre Neg	I15		PSNL	9	6	2	1	3	3	7	7	3	6	6	6		3	0	1	2	2	2	2	0	3	1	2	4		30	15	41	54	59		15	4	3	0	1
						Cre Neg	J2		PSNL	4	4	1	1	1	2	4	1	4	10	6	7		3	0	4	2	2	3	1	0	4	8	2	0		24	45	32	59	64		12	1	0	1	6
						Cre Neg	J8		PSNL	18	15	13	8	8	4	4	1	2	2	2	6		0	0	1	1	2	0	0	0	1	0	1	1		17	25	38	43	46		14	9	1	0	3
						Cre Neg	J13		PSNL	16	13	23	13	22	21	17	18	13	10	10	9		4	1	3	1	2	2	0	1	0	1	4	0		29	38	43	49	36		32	4	11	2	2
						Cre Neg	K1		PSNL	23	19	13	0	5	3	5	2	0	0	1	1		0	2	1	2	0	2	0	0	0	0	1	0		30	31	50	49	45		13	1	1	2	2
						Cre Neg	B10		PSNL	19	13	9	8	9	5	1	3	3	3	6	4		2	0	0	0	0	0	1	2	0	2	2	1		30	68	69	68	71		16	7	6	5	2
						Cre Neg	E2		PSNL	9	8	6	7	6	12	7	10	7	4	5	1		8	7	3	2	5	5	4	2	6	1	3	3		21	34	45	53	60		7	1	2	4	2
						Cre Neg	E5		PSNL	6	9	9	9	10	10	12	5	3	3	4	10		0	3	1	2	1	2	2	1	0	2	1	0		31	30	46	56	68		16	7	2	4	2
						Cre Neg	F11		PSNL	5	12	3	5	3	4	7	4	2	2	8	4		0	0	0	0	0	1	0	0	0	0	1	1		27	22	27	30	22		10	5	3	2	3
						Cre Neg	F15		PSNL	10	10	11	9	3	7	10	14	14	10	11	9		5	6	6	6	3	4	3	1	2	5	2	0		19	11	18	34	32		7	7	4	6	10
						Cre Neg	G7		PSNL	27	15	20	21	18	20	12	15	17	14	8	12		5	6	6	1	4	16	12	8	6	0	0	2		26	25	49	63	14		16	3	5	4	1
						Cre Neg	EXTRA2		PSNL	3	5	7	8	3	4	0	2	11	4	4	4		1	5	0	2	2	0	3	1	1	0	1	1		32	45	53	44	53		13	3	2	1	2
						Cre Neg	H2		PSNL	6	3	1	3	1	2	6	5	2	0	5	1		9	5	17	2	3	9	5	5	5	0	6	1		21	39	53	48	56		26	7	5	5	4
						Cre Neg	I7		PSNL	3	6	1	3	4	4	5	3	3	4	2	15		0	0	0	0	10	3	0	4	1	5	1	1		6	42	42	37	33		9	6	0	0	0
						Cre Neg	J9		PSNL	32	19	19	8	7	2	5	6	6	7	9	16		2	1	1	0	0	0	0	0	0	0	2	0		27	24	34	48	47		7	12	7	6	3
						SynCrePOS	W2		PSNL	13	7	10	10	8	12	13	11	3	12	17	17		2	5	7	3	8	15	3	8	5	1	2	2		33	54	60	56	53		14	3	18	2	4
						SynCrePOS	W9		PSNL	20	26	18	26	21	17	14	16	13	15	21	20		0	0	1	1	0	0	0	0	0	0	0	1		46	37	52	28	59		14	2	12	0	13
						SynCrePOS	Z6		PSNL	14	13	17	22	21	18	15	21	9	11	14	16		0	1	0	3	3	3	3	2	1	1	1	1		30	38	48	47	53		10	7	8	8	5
						SynCrePOS	Z7		PSNL	17	32	21	22	25	24	24	19	23	23	17	22		2	10	2	2	7	9	1	1	2	4	7	9		42	21	53	31	75		14	3	1	5	3
						SynCrePOS	Z8		PSNL	31	26	14	9	9	11	13	18	19	13	17	10		6	4	1	2	1	4	1	1	0	2	4	3		38	22	45	36	46		32	4	7	10	2
						SynCrePOS	M11		PSNL	9	1	4	4	3	4	3	5	3	4	3	4		1	0	0	1	0	0	0	1	0	0	0	0		44	26	44	41	50		26	8	7	3	1
						SynCrePOS	N12		PSNL	5	7	6	12	6	7	5	5	5	4	5	2		0	0	3	4	3	0	4	0	3	3	2	1		26	49	50	54	45		16	4	6	1	4
						SynCrePOS	N13		PSNL	17	24	14	5	2	2	6	6	7	5	7	9		1	3	5	1	0	1	1	1	3	1	1	4		17	46	49	99	83		25	3	3	9	15
						SynCrePOS	C4		PSNL	12	13	7	6	5	3	8	7	4	5	9	6		6	8	3	5	2	7	2	4	2	4	5	2		37	51	36	47	31		18	8	11	6	12
						SynCrePOS	C15		PSNL	28	10	9	8	9	5	7	4	9	5	5	4		4	1	0	0	1	1	3	2	1	1	1	2		47	54	42	56	51		17	7	2	2	7
						SynCrePOS	E14		PSNL	3	5	7	7	6	4	9	5	3	3	3	3		2	3	3	1	3	2	1	1	0	3	1	1		38	15	17	21	42		2	1	2	2	2
						SynCrePOS	F5		PSNL	22	12	7	9	9	5	9	7	12	13	21	17		0	2	2	7	1	2	3	5	4	0	3	4		35	36	44	96	95		20	0	8	9	5
						SynCrePOS	F9		PSNL	5	22	8	7	8	3	6	7	12	12	14	7		0	2	2	0	1	0	2	0	2	2	2	2		21	27	34	43	24		13	3	10	0	2
						SynCrePOS	G1		PSNL	2	5	2	8	5	8	4	6	8	9	10	10		0	1	0	0	0	2	0	6	8	1	3	3		14	4	17	24	2		13	9	3	1	4
						SynCrePOS	G2		PSNL	10	14	15	14	10	10	7	17	8	8	14	11		4	4	5	4	2	6	0	5	3	4	3	2		29	2	3	49	46		12	1	0	5	10
						SynCrePOS	G6		PSNL	24	13	12	12	14	11	11	15	13	13	21	13		0	0	3	0	4	3	0	1	4	8	4	1		29	41	53	54	55		16	3	8	9	0
						SynCrePOS	G11		PSNL	9	21	15	17	8	14	8	17	12	10	8	20		0	1	0	0	0	0	0	0	1	1	2	2		30	17	47	58	60		5	4	3	1	2
						SynCrePOS	G15		PSNL	10	5	4	3	8	6	1	1	9	17	17	16		0	0	6	2	1	3	0	3	4	6	2	3		29	33	45	33	31		19	2	0	1	6
						SynCrePOS	I3		PSNL	8	5	14	4	8	10	16	13	16	17	21	16		1	1	1	1	3	0	0	1	1	1	1	2		48	54	56	47	54		7	6	0	4	1
						SynCrePOS	I13		PSNL	6	10	9	10	11	17	1	1	4	5	2	1		0	3	1	0	1	3	3	5	1	3	3	1		17	45	44	42	47		24	3	2	4	5
						LysCrePOS	V7		PSNL	7	3	1	2	1	2	6	6	3	1	4	7		4	1	0	4	2	4	7	2	4	2	1	5		20	25	64	53	46		12	0	3	3	2
						LysCrePOS	V15		PSNL	2	1	1	6	8	7	2	6	3	13	1	8		2	1	0	1	3	1	4	7	1	2	0	1		37	50	69	58	22					11	7
						LysCrePOS	W11		PSNL	20	29	20	13	12	9	12	23	20	16	10	19		0	0	3	2	1	0	1	1	3	3	4	2		18	38	40	37	43		12	3	2	5	0
						LysCrePOS	W12		PSNL	7	28	20	20	30	29	22	24	17	17	12	14		0	5	5	3	5	3	6	8	5	3	4	1		30	26	71	56	54		8	4	1	1	3
						LysCrePOS	L6		PSNL	10	10	5	3	4	9	6	4	9	4	10	4		2	0	0	0	0	1	1	0	0	0	1	0		30	18	49	51	50		9	2	0	0	3
						LysCrePOS	L7		PSNL	10	3	3	4	3	5	14	8	9	3	5	2		5	2	0	2	0	1	1	1	2	1	1	0		12	36	76	83	82		23	7	2	2	5
						LysCrePOS	M2		PSNL	22	1	10	1	5	3	4	5	6	4	2	5		1	0	1	0	0	0	0	0	0	0	0	0		35	26	53	62	76		7	1	0	1	0
						LysCrePOS	N8		PSNL	21	21	7	10	4	9	5	6	8	11	7	9		2	0	0	0	0	0	0	1	0	0	0	0		46	27	37	44	42		26	11	0	1	1
						LysCrePOS	N9		PSNL	9	28	12	2	6	6	5	7	8	7	8	8		0	1	0	0	0	0	0	1	2	0	0	0		27	35	51	54	82		12	6	2	2	4
						LysCrePOS	C3		PSNL	21	19	8	10	18	13	13	12	9	11	14	18		8	1	2	1	1	4	1	1	0	0	0	3		35	45	41	39	40		18	9	11	6	8
						LysCrePOS	D6		PSNL	8	13	5	7	9	3	5	5	5	3	12	8		0	2	3	0	0	0	0	0	1	1	0	0		43	11	18	16	32		16	8	4	0	3
						LysCrePOS	D12		PSNL	27	23	17	23	12	5	10	6	7	4	2	1		3	1	3	2	1	2	9	5	5	3	5	2		51	55	48	54	38		13	4	11	7	3
						LysCrePOS	F3		PSNL	12	12	5	6	2	5	5	4	3	2	14	10		1	1	1	0	0	0	1	0	2	0	0	0		14	31	48	52	44		8	2	7	2	3
						LysCrePOS	H3		PSNL	10	4	6	12	4	9	3	1	3	7	16	3		0	0	0	1	0	0	1	0	0	0	0	0		38	22	22	27	33		13	3	0	1	3
						LysCrePOS	H4		PSNL	19	13	18	24	23	1	17	24	14	17	14	9		0	1	2	6	5	1	5	1	2	3	2	4		15	31	39	91	56		6	2	1	2	0
						LysCrePOS	I1		PSNL	11	11	14	4	6	4	8	5	7	10	6	6		0	1	0	1	0	1	0	0	1	1	0	0		31	11	18	18	20		17	3	4	4	4
						LysCrePOS	I5		PSNL	7	7	3	3	1	2	0	1	4	3	3	4		2	1	0	1	4	0	0	4	0	1	2	1		23	5	46	41	66		24	4	10	3	2
						LysCrePOS	I8		PSNL	22	13	10	21	12	5	14	6	5	2	5	10		1	1	2	1	0	1	1	0	0	0	0	2		12	11	29	50	58		13	3	1	0	9
						LysCrePOS	J1		PSNL	9	6	9	7	7	6	9	7	9	8	13	7		0	0	3	0	2	0	4	2	0	1	0	1		7	17	24	44	28		4	4	2	5	6
								Cre Neg	Average	12.1389	11.5278	8.69444	6.66667	6.38889	6.97222	7.41667	8.08333	7.22222	6.47222	7.05556	8.08333		2.41667	3.02778	2.41667	1.27778	1.83333	2.47222	1.63889	1.55556	1.72222	1.77778	2.02778	1.27778		29.1944	33.5556	42.6667	45.5278	47.1944		13.8611	4.44444	4.27778	2.94444	4.25
									SD	8.37736	7.09723	6.20516	5.09902	5.79299	5.26165	6.22151	7.69926	7.34112	6.43422	5.75174	7.79515		2.5114	3.68383	3.07409	1.52336	2.56905	3.69931	2.36828	2.07632	1.98006	2.56472	2.52401	1.68372		12.0447	18.143	17.4651	16.8124	17.7713		5.37801	2.92227	4.53312	2.78716	6.01605
									N	36	36	36	36	36	36	36	36	36	36	36	36		36	36	36	36	36	36	36	36	36	36	36	36		36	36	36	36	36		36	36	36	36	36
									SEM	1.39623	1.18287	1.03419	0.849837	0.965498	0.876941	1.03692	1.28321	1.22352	1.07237	0.958624	1.29919		0.418567	0.613972	0.512348	0.253894	0.428174	0.616552	0.394713	0.346054	0.33001	0.427453	0.420669	0.28062		2.00745	3.02383	2.91084	2.80206	2.96188		0.896335	0.487046	0.755521	0.464526	1.00267
								SynCrePOS	Average	13.25	13.55	10.65	10.75	9.8	9.55	9	10.05	9.6	10.2	12.3	11.2		1.45	2.45	2.25	1.85	2.05	3.05	1.35	2.35	2.25	2.3	2.35	2.3		32.5	33.6	41.95	48.1	50.1		15.85	4.05	5.55	4.1	5.15
									SD	8.28997	8.73875	5.19387	6.4716	6.07497	6.02167	5.63822	6.35341	5.5098	5.3959	6.68147	6.58227		2.01246	2.72368	2.12442	1.95408	2.23548	3.77631	1.38697	2.34577	2.04875	2.10513	1.7252	1.89459		10.2315	16.3108	14.3947	20.1073	20.2768		7.29293	2.58488	4.80652	3.35449	4.24605
									N	20	20	20	20	20	20	20	20	20	20	20	20		20	20	20	20	20	20	20	20	20	20	20	20		20	20	20	20	20		20	20	20	20	20
									SEM	1.85369	1.95404	1.16139	1.44709	1.3584	1.34649	1.26074	1.42067	1.23203	1.20656	1.49402	1.47184		0.45	0.609033	0.475035	0.436945	0.499868	0.844409	0.310136	0.52453	0.458114	0.470722	0.385766	0.423643		2.28784	3.64721	3.21876	4.49614	4.53402		1.63075	0.577996	1.07477	0.750088	0.949446
								LysCrePOS	Average	13.3684	12.8947	9.15789	9.36842	8.78947	6.94737	8.42105	8.42105	7.84211	7.52632	8.31579	8		1.63158	1	1.31579	1.31579	1.26316	1	2.21053	1.78947	1.47368	1.10526	1.05263	1.15789		27.5789	27.3684	44.3684	48.9474	48		13.3889	4.22222	3.38889	2.94737	3.47368
									SD	7.01752	9.35055	6.16679	7.52928	7.71419	6.15064	5.65995	7.18266	4.74064	5.34757	4.83106	4.85341		2.13985	1.1547	1.52944	1.60044	1.75885	1.33333	2.76041	2.43992	1.71167	1.19697	1.61499	1.50049		12.6461	13.7364	17.5221	18.5457	18.5742		6.28854	2.90143	3.79068	2.83772	2.5899
									N	19	19	19	19	19	19	19	19	19	19	19	19		19	19	19	19	19	19	19	19	19	19	19	19		19	19	19	19	19		18	18	18	19	19
									SEM	1.60993	2.14516	1.41476	1.72734	1.76976	1.41105	1.29848	1.64782	1.08758	1.22682	1.10832	1.11345		0.490915	0.264906	0.350877	0.367166	0.403509	0.305888	0.633282	0.559756	0.392685	0.274605	0.370504	0.344235		2.90122	3.15136	4.01984	4.25467	4.26121		1.48222	0.683874	0.893473	0.651017	0.594165
					21
					22
					23
					24
					25
					26
					28
					29
					30
					31
					32
					33
					34
					35
					36

## Sheet: Figure3-figure suppl1_Stats
Figure1-figure supplement1A
	Mixed Model Analysis
	Fixed Effects
	Type III Tests of Fixed Effectsa
	Source	Numerator df	Denominator df	F	Sig.
	Intercept	1	808.86	1659.68	3.63333e-198
	Genotype	2	808.86	13.5958	1.55769e-06
	Day	11	130.939	3.49046	0.000268045
	Genotype * Day	22	130.939	0.339884	0.997613
	a. Dependent Variable: Active.
	Pairwise Comparisonsa
	(I) Genotype		Mean Difference (I-J)	Std. Error	df	Sig.c	95% Confidence Interval for Differencec
							Lower Bound	Upper Bound
	CreNeg	Syn	-2.765*	0.530272	808.86	7.04783e-07	-4.03692	-1.49271
		LysM	-1.02753	0.539168	808.86	0.1711	-2.32098	0.265913
	Syn	CreNeg	2.765*	0.530272	808.86	7.04783e-07	1.49271	4.03692
		LysM	1.737*	0.609132	808.86	0.0133632	0.275992	3.19857
	LysM	CreNeg	1.02753	0.539168	808.86	0.1711	-0.265913	2.32098
		Syn	-1.737*	0.609132	808.86	0.0133632	-3.19857	-0.275992
	Based on estimated marginal means
	*. The mean difference is significant at the .05 level.
	a. Dependent Variable: Active.
	c. Adjustment for multiple comparisons: Bonferroni.
