# Supplementary material for: Protective role of neuronal and lymphoid cannabinoid CB2 receptors in neuropathic pain
Source: eLife journal article supplement (doi:10.7554/elife.55582), 2020-07-20
Supplement: supp [file elife-55582-supp-v1.zip › elife_poa_e55582_Figure_3_source_data_1.xlsx]

## Sheet: Figure3_RawData
		SelfAdmin	Von Frey	Plantar	Plus Maze
		N	N	N	N
Cre Neg		36	34	35	35
SynCrePOSITIVE		20	20	20	19
LysMCrePOSITIVE		19	18	18	18
								Figure 3A															Figure 3B																		Figure 3C
								JWH133 Self-administration															Von Frey test									Plantar test									Elevated Plus Maze
								Active Session Responding			Overall		Inactive Session Responding			Overall		Discrimination Index			Overall		VF IPSI				VF CONTRA					PT IPSI				PT CONTRA
						Genotype	Mouse	day10	day11	day12	AUC LAST 3 days ACTIVE		day10	day11	day12	AUC LAST 3 days INACTIVE		day10	day11	day12	AUC LAST 3 days DI		Day-1	Day3	Day6	Day18	Day-1	Day3	Day6	Day18		Day-1	Day3	Day6	Day18	Day-1	Day3	Day6	Day18		% Entries Open Arms
						Cre Neg	V3	10	13	8	22		1	0	0	0.5		0.818182	1	1	1.90909		0.933	0.512	0.46	0.579	1.513	1.502	1.086	0.864		11.7567	4.34667	4.73	3.49333	11.9425	9.90667	7.47	10.1033		38.2353
						Cre Neg	V4	3	2	6	6.5		0	1	0	1		1	0.333333	1	1.33333		1.392	0.709	0.512	0.864	1.513	1.241	1.218	1.392		11.0067	5.57667	2.88333	5.26333	12.81	8.89	10.0033	9.04333		37.5
						Cre Neg	V10	16	15	16	31		10	10	3	16.5		0.230769	0.2	0.684211	0.65749		1.137	0.198	0.625	0.966	1.241	1.137	1.513	1.218		10.6967	5.95333	5.46667	6.55667	10.6867	9.22333	10.5167	10.4867		39.3939
						Cre Neg	W1	1	1	3	3		0	0	1	0.5		1	1	0.5	1.75		1.513	0.223	0.272	1.392	1.392	1.513	1.392	1.513		8.60667	5.97	5.3575	8.67	8.05	8.745	8.22	10.66		18.75
						Cre Neg	W7	2	0	1	1.5		2	1	1	2.5		0	-1	0	-1		1.086	0.579	0.701	0.579	1.241	1.137	0.891	1.241		9.14	5.31333	4.42	9.09667	9.81667	9.36333	9.7825	8.93333		24
						Cre Neg	W8	1	15	31	31		0	0	0	0		1	1	1	2		1.007	0.579	0.334	0.272	1.513	1.241	0.933	1.392		9.57	4.60333	3.33	7.16	9.88	8.6925	10.0325	9.54		7.14286
						Cre Neg	W13	15	14	28	35.5		6	8	5	13.5		0.428571	0.272727	0.69697	0.835498		1.392	0.163	0.587	0.933	1.513	1.137	0.891	1.392		10.3	5.44333	4.09667	8.32333	7.81	8.90667	9.35667	8.53667		38.0952
						Cre Neg	W14	3	14	7	19		3	7	5	11		0	0.333333	0.166667	0.416667		1.513	0.669	0.42	0.82	1.392	1.513	1.513	1.218		10.04	4.895	4.68667	8.5	12.1375	10.16	11.0367	9.29		35
						Cre Neg	L4	4	6	8	12		0	5	0	5		1	0.0909091	1	1.09091		1.513	0.42	0.701	0.42	1.218	1.513	1.241	1.502		9.45	4.08	5.405	5.67333	11.7	11.46	6.27	9.24667		30
						Cre Neg	L10	1	3	1	4		0	1	0	1		1	0.5	1	1.5																				25
						Cre Neg	L13	9	8	8	16.5		3	5	4	8.5		0.5	0.230769	0.333333	0.647436		1.513	0.223	0.176	0.512	1.513	0.997	1.392	1.241		9.34333	5.505	7.0325	8.42333	10.6367	9.315	12.3725	10.4233		25
						Cre Neg	M3	6	13	10	21		1	0	4	2.5		0.714286	1	0.428571	1.57143		1.513	0.512	0.579	0.891	1.513	1.513	1.392	1.218		11.39	6.47	6.35333	6.01667	11.7233	12.5867	8.26	12.8867		31.5789
						Cre Neg	N1	3	4	5	8		0	0	0	0		1	1	1	2		1.513	0.669	0.625	0.701	1.137	1.218	1.502	1.241		11.1667	11.1967	5.56333	19.1333	12.6267	11.5233	7.75	14.6025
						Cre Neg	N2	32	29	30	60		5	4	5	9		0.72973	0.757576	0.714286	1.47958		1.513	0.239	0.282	0.709	1.392	1.241	0.891	1.241		11.4033	7.83	13.5033	14.1567	9.64667	11.11	10.86	12.27		30
						Cre Neg	N5	1	1	1	2		0	0	0	0		1	1	1	2		1.218	0.17	0.587	0.587	1.218	0.701	1.241	1.241		8.91333	5.86667	5.37667	14.54	9.49667	10.73	10.4933	18.7233		25
						Cre Neg	N6	7	3	5	9		3	1	0	2.5		0.4	0.5	1	1.2		1.241	0.587	0.42	0.579	1.513	1.502	1.513	1.086		13.5567	7.1475	5.93333	5.61333	11.6375	11.0833	11.2933	12.4867		26.6667
						Cre Neg	N14	10	5	7	13.5		0	0	1	0.5		1	1	0.75	1.875		1.241	0.343	0.709	0.891	1.137	1.513	1.086	1.513		11.1567	5.02333	2.91	6.115	10.9533	10.7033	13.34	8.23		31.8182
						Cre Neg	B11	6	5	3	9.5		0	0	0	0		1	1	1	2		1.086	0.512	0.223	0.625	0.891	0.731	0.731	0.966		11.4833	7.38	5.82333	10.5933	13.675	8.21667	8.64333	11.26		36
						Cre Neg	C7	2	2	2	4		5	0	0	2.5		-0.428571	1	1	1.28571						1.241	1.502	0.512	0.825		12.55	4.16	4.87	4.82667	9.99	9.01667	8.33667	8.43		31.8182
						Cre Neg	G3	18	5	3	15.5		0	0	0	0		1	1	1	2		1.502	0.42	0.301	0.625	1.392	1.502	0.509	1.007		7.9675	5.5	6.72	5.44	7.2125	8.15	6.74667	7.49667		21.2121
						Cre Neg	H7	4	9	3	12.5		0	1	2	2		1	0.8	0.2	1.4		1.392	0.247	0.223	0.625	1.218	0.701	0.42	0.933		8.19667	4.68	3.90333	7.6475	7.95333	7.70333	7.25667	8.02		31.8182
						Cre Neg	I15	6	6	6	12		1	2	4	4.5		0.714286	0.5	0.2	0.957143		1.513	0.074	0.418	0.037	1.513	0.997	1.086	0.933		11.0933	3.80333	4.73	5.14667	10.9467	7.39	7.48333	8.70333		46.4286
						Cre Neg	J2	10	6	7	14.5		8	2	0	6		0.111111	0.5	1	1.05556		1.392	0.045	0.082	0.512	1.392	1.392	0.864	0.625		8.51	4.63667	4.55	6.62667	8.77333	7.45	7.61	8.30333		33.3333
						Cre Neg	J8	2	2	6	6		0	1	1	1.5		1	0.333333	0.714286	1.19048		0.933	0.183	0.11	0.587	0.933	0.669	0.966	0.701		9.2125	4.2	4.38	5.24667	8.15	7.81	7.31667	7.1		42.1053
						Cre Neg	J13	10	10	9	19.5		1	4	0	4.5		0.818182	0.428571	1	1.33766		1.513	0.071	0.42	0.341	1.241	0.334	0.512	1.241		7.22	5.38	4.35	6.38	7.38	9.065	7.86	8.93333		39.1304
						Cre Neg	K1	0	1	1	1.5		0	1	0	1							0.933	0.176	0.223	0.512	1.241	1.392	1.086	0.891		8.13667	4.64	4.30333	5.47667	8.05333	7.83	6.68667	7.98667		28.5714
						Cre Neg	B10	3	6	4	9.5		2	2	1	3.5		0.2	0.5	0.6	0.9		1.502	0.239	0.343	0.731	1.218	0.512	1.218	1.137		9.76	5.37333	5.65667	5.9725	8.1	7.33	7.905	8.88667		20.5882
						Cre Neg	E2	4	5	1	7.5		1	3	3	5		0.6	0.25	-0.5	0.3		1.392	0.412	0.247	0.301	1.513	1.241	1.218	1.392		8.20667	3.83	4.98333	4.10333	5.75667	7.28667	7.43667	6.38		31.0345
						Cre Neg	E5	3	4	10	10.5		2	1	0	2		0.2	0.6	1	1.2		1.502	0.512	0.579	0.42	1.502	0.966	1.392	1.137		8.4975	4.99667	5.37333	4.49	7.56333	7.22667	7.93667	6.24		44.4444
						Cre Neg	F11	2	8	4	11		0	1	1	1.5		1	0.777778	0.6	1.57778		1.392	0.512	0.46	0.512	1.502	1.502	1.392	0.223		6.27	3.96667	4.77	4.08	6.52333	7.51333	7.88333	6.43667		53.5714
						Cre Neg	F15	10	11	9	20.5		5	2	0	4.5		0.333333	0.692308	1	1.35897											8.10333	9.86	5.42	5.65	6.305	8.9	7.52	7.70333		29.1667
						Cre Neg	G7	14	8	12	21		0	0	2	1		1	1	0.714286	1.85714		1.086	0.247	0.054	0.343	1.137	0.869	1.137	1.007		8.37333	2.72667	4.52333	4.6	8.85667	7.59	7.46	7.49		37.1429
						Cre Neg	EXTRA2	4	4	4	8		0	1	1	1.5		1	0.6	0.6	1.4		1.241	0.549	0.587	0.864	1.241	0.674	0.587	0.669											31.8182
						Cre Neg	H2	0	5	1	5.5		0	6	1	6.5							1.086	0.512	0.095	0.282	1.218	1.502	0.512	1.513		8.78333	5.7	4.01667	5.23667	7.53667	7.64	7.50667	7.35		17.3913
						Cre Neg	I7	4	2	15	11.5		5	1	1	4		-0.111111	0.333333	0.875	0.715278		1.513	0.111	0.272	0.579	1.513	1.086	0.864	0.674		9.02	4.39	5.0175	4.89667	9.61667	6.90667	7.8875	7.63333		31.5789
						Cre Neg	J9	7	9	16	20.5		0	2	0	2		1	0.636364	1	1.63636		1.241	0.091	0.058	0.091	1.513	0.512	1.392	1.513		7.47667	8.6175	4.33667	6.24667	7.32	8.83333	7.0025	7.94667		26.6667
						SynCrePOS	W2	12	17	17	31.5		1	2	2	3.5		0.846154	0.789474	0.789474	1.60729		1.241	0.625	0.579	0.42	1.241	1.502	1.392	1.392		10.9233	4.75	5.44333	9.37667	10.89	12.5575	7.69667	10.76		41.3793
						SynCrePOS	W9	15	21	20	38.5		0	0	1	0.5		1	1	0.904762	1.95238		1.241	0.625	0.223	0.701	1.502	1.513	1.392	0.933		10.1567	5.51667	6.86	7.10667	12.23	11.34	10.0125	10.0067		42.2222
						SynCrePOS	Z6	11	14	16	27.5		1	1	1	2		0.833333	0.866667	0.882353	1.72451		1.241	0.071	0.045	0.202	1.513	1.392	1.513	1.392		9.74333	3.07667	4.37333	7.03333	8.82667	8.85333	9.80667	10.0467		42.1053
						SynCrePOS	Z7	23	17	22	39.5		4	7	9	13.5		0.703704	0.416667	0.419355	0.978196		1.392	0.139	0.198	0.486	1.513	0.997	1.513	1.513		7.69	6.33	6.7	8.85	9.4075	11.53	9.52333	10.9067		23.0769
						SynCrePOS	Z8	13	17	10	28.5		2	4	3	6.5		0.733333	0.619048	0.538462	1.25495		1.513	0.074	0.045	0.549	1.513	0.966	0.966	1.392		10.6333	5.5	4.75333	8.82	12.2133	9.91333	11.9667	11.02		33.3333
						SynCrePOS	M11	4	3	4	7		0	0	0	0		1	1	1	2		0.997	0.334	0.579	0.512	1.513	1.137	0.709	0.625		11.89	6.33667	5.01667	9.13	11.7267	10.43	8.17333	15.4367		17.2414
						SynCrePOS	N12	4	5	2	8		3	2	1	4		0.142857	0.428571	0.333333	0.666667		1.513	0.223	0.42	0.42	1.502	1.086	0.42	1.137		9.95667	6.78667	5.22667	6.85						28.5714
						SynCrePOS	N13	5	7	9	14		1	1	4	3.5		0.666667	0.75	0.384615	1.27564		1.513	1.063	0.512	0.512	1.241	1.241	0.997	0.966		11.345	4.31667	5.69667	9.93	12.27	11.6367	8.87667	14.215		34.2857
						SynCrePOS	C4	5	9	6	14.5		4	5	2	8		0.111111	0.285714	0.5	0.59127		0.933	0.123	0.512	0.512	1.513	0.183	0.731	1.137		9.44	4.15	5.37667	7.04667	9.34	8.95667	7.95333	7.81333		27.7778
						SynCrePOS	C15	5	5	4	9.5		1	1	2	2.5		0.666667	0.666667	0.333333	1.16667		1.137	0.334	0.368	0.625	1.137	0.933	0.761	0.549		11.1067	5.42667	6.07	6.83	8.48333	9.72	7.82	7.105		33.9623
						SynCrePOS	E14	3	3	3	6		3	1	1	3		0	0.5	0.5	0.75		1.241	0.161	0.202	0.239	1.392	0.966	1.086	1.218		7.95	2.73667	4.68	4.99667	6.57667	7.38333	7.47333	7.72333		26.3158
						SynCrePOS	F5	13	21	17	36		0	3	4	5		1	0.75	0.619048	1.55952		1.392	0.223	0.46	0.334	1.086	0.731	0.825	0.674		7.45333	3.86	3.69667	5.91	7.96333	6.9825	6.15333	6.44333		36.3636
						SynCrePOS	F9	12	14	7	23.5		2	2	2	4		0.714286	0.75	0.555556	1.38492		1.392	0.533	0.334	0.625	1.513	0.933	1.137	0.997		4.85333	3.75333	3.98	3.98667	5.05667	6.58	7.28667	6.98333
						SynCrePOS	G1	9	10	10	19.5		1	3	3	5		0.8	0.538462	0.538462	1.20769		1.392	0.132	0.091	0.701	1.513	0.997	0.669	1.241		7.69	6.92333	4.98667	7.10333	6.8925	6.59667	7.70333	7.16333		24.1379
						SynCrePOS	G2	8	14	11	23.5		4	3	2	6		0.333333	0.647059	0.692308	1.15988		1.241	0.239	0.091	0.38	1.392	1.502	0.966	1.052		7.475	4.7475	4.10667	5.105	7.79	6.74667	7.36	10.08		20
						SynCrePOS	G6	13	21	13	34		8	4	1	8.5		0.238095	0.68	0.857143	1.22762		1.392	0.074	0.198	0.267	1.513	0.272	1.241	0.512		8.2275	4.09667	3.9825	4.97333	9.12667	7.04333	6.22	6.83667		32
						SynCrePOS	G11	10	8	20	23		1	2	2	3.5		0.818182	0.6	0.818182	1.41818		1.513	0.138	0.161	0.272	1.137	1.264	0.625	0.42		9.13	4.97667	3.9475	3.57333	8.43	6.88	5.69333	5.71333		28.5714
						SynCrePOS	G15	17	17	16	33.5		6	2	3	6.5		0.478261	0.789474	0.684211	1.37071		1.218	0.272	0.223	0.163	1.241	0.701	0.82	0.701		7.43333	4.07333	4.31333	4.18	7.94	6.52333	6.51	6.41333		39.5349
						SynCrePOS	I3	17	21	16	37.5		1	1	2	2.5		0.888889	0.909091	0.777778	1.74242						1.392	1.137	0.966	1.502		8.62667	3.29	3.94333	5.30667	7.82333	7.62667	7.56333	8.57667		29.6296
						SynCrePOS	I13	5	2	1	5		3	3	1	5		0.25	-0.2	0	-0.075		1.513	0.239	0.074	0.183	1.502	0.625	0.343	1.502		8.63	2.99	4.1475	4.49333	8.63667	8.56667	6.96333	7.23667		25.9259
						LysCrePOS	V7	1	4	7	8		2	1	5	4.5		-0.333333	0.6	0.166667	0.516667		1.513	0.625	0.272	0.479	1.392	1.392	1.241	1.513		10.89	5.66333	4.085	3.46333	9.22	11.5875	7.16	7.29667		33.3333
						LysCrePOS	V15	13	1	8	11.5		2	0	1	1.5		0.733333	1	0.777778	1.75556
						LysCrePOS	W11	16	10	19	27.5		3	4	2	6.5		0.684211	0.428571	0.809524	1.17544		1.513	0.132	0.123	0.223	1.241	1.24	1.137	1.392		9.00333	9.26	4.73667	10.395	11.0633	9.62333	9.12667	11.9633		27.2727
						LysCrePOS	W12	17	12	14	27.5		3	4	1	6		0.7	0.5	0.866667	1.28333		1.137	0.272	0.198	0.334	1.137	0.933	1.502	0.864		9.245	4.53333	6.68	7.30667	10.61	8.96	9.19333	10.1833		25
						LysCrePOS	L6	4	10	4	14		0	1	0	1		1	0.818182	1	1.81818		1.086	0.223	0.418	0.512	1.502	0.997	1.502	0.82		10.5867	6.79	5.55333	6.925	11.2467	12.57	9.15667	9.32333		29.1667
						LysCrePOS	L7	3	5	2	7.5		1	1	0	1.5		0.5	0.666667	1	1.41667		1.241	0.512	0.669	0.864	1.502	1.392	1.513	0.825		11.6867	5.91667	5.71	7.08333	12.11	10.5333	8.12667	11.2167		27.2727
						LysCrePOS	M2	4	2	5	6.5		0	0	0	0		1	1	1	2		1.392	0.272	0.272	0.334	0.99	0.825	0.933	0.239		9.12667	5.87	5.46333	9.9725	11.0267	11.3667	8.29333	11.0167		40
						LysCrePOS	N8	11	7	9	17		0	0	0	0		1	1	1	2		0.891	0.17	0.161	0.579	1.086	1.218	0.549	0.731		8.74667	6.69333	9.72	10.93	8.39667	8.13333	11.47	9.89333		26.087
						LysCrePOS	N9	7	8	8	15.5		0	0	0	0		1	1	1	2		1.241	0.163	0.198	0.512	1.513	1.513	1.007	0.891		10.0767	6.05667	5.15667	5.65333	11.0133	11.1633	11.3133	11.7433		27.7778
						LysCrePOS	C3	11	14	18	28.5		0	0	3	1.5		1	1	0.714286	1.85714		1.241	0.058	0.272	0.669	1.513	0.587	1.137	0.891		8.96	3.86333	4.85667	6.14	8.27667	8.96667	9.21333	8.05		33.3333
						LysCrePOS	D6	3	12	8	17.5		1	0	0	0.5		0.5	1	1	1.75		1.086	0.163	0.334	0.625	1.086	0.825	0.704	1.392		6.3	5.43667	4.665	7.30667	7.34333	8.3	8.79	6.73667		33.3333
						LysCrePOS	D12	4	2	1	4.5		3	5	2	7.5		0.142857	-0.428571	-0.333333	-0.52381		0.891	0.272	0.339	1.137	0.891	0.891	0.334	0.701		10.12	6.8075	5.52333	8.22	8.59667	7.755	7.60333	7.29		37.5
						LysCrePOS	F3	2	14	10	20		0	0	0	0		1	1	1	2		1.502	0.343	0.625	0.512	1.241	0.864	0.891	1.137		7.89667	5.6975	7.02333	7.58667	8.23667	8.22	7.15	9.04		32
						LysCrePOS	H3	7	16	3	21		0	0	0	0		1	1	1	2		0.933	0.202	0.334	0.343	1.392	1.392	1.137	1.502		8.04	4.23	4.14333	5.31667	8.17667	8.22	6.69	7.99667		38.2353
						LysCrePOS	H4	17	14	9	27		3	2	4	5.5		0.7	0.75	0.384615	1.29231		1.392	0.1009	0.223	0.709	1.513	0.625	1.392	1.218		9.17	4.39333	4.17	7.06333	9.64	8.60667	6.82333	9.31333		21.7391
						LysCrePOS	I1	10	6	6	14		1	0	0	0.5		0.818182	1	1	1.90909		1.513	0.486	0.272	0.512	1.513	1.392	1.392	1.513		8.01	3.56667	4.48667	4.09333	9.215	8.04333	5.9425	5.58		35.2941
						LysCrePOS	I5	3	3	4	6.5		1	2	1	3		0.5	0.2	0.6	0.75		1.513	0.074	0.058	0.161	1.392	0.891	1.086	1.513		9.05333	3.83	5.1	7.3425	8.21667	7.21333	7.83	7.66333		36
						LysCrePOS	I8	2	5	10	11		0	0	2	1		1	1	0.666667	1.83333		1.513	0.512	0.115	0.625	1.392	1.513	1.392	1.513		9.16333	3.39667	5.785	5.66667	9.10667	8.04333	7.6875	7.3875		24
						LysCrePOS	J1	8	13	7	20.5		1	0	1	1		0.777778	1	0.75	1.76389		0.997	0.587	0.625	0.731	1.392	0.512	1.241	0.933		9.52333	4.18	5.28333	5.58667	8.96333	7.91	8.27667	7.825		14.2857
						Cre Neg	Average	6.47222	7.05556	8.08333	14.3333		1.77778	2.02778	1.27778	3.55556		0.65467	0.593245	0.714047	1.2776		1.31688	0.354788	0.384394	0.596424	1.33465	1.13832	1.06156	1.11471		9.59875	5.56064	5.14047	7.04103	9.44902	8.94875	8.63341	9.34596		31.3429
							SD	6.43422	5.75174	7.79515	11.527		2.56472	2.52401	1.68372	3.9257		0.416552	0.410973	0.367623	0.624973		0.204466	0.201669	0.202079	0.272438	0.175668	0.358168	0.337318	0.307916		1.64271	1.75751	1.75169	3.29926	2.07516	1.48373	1.73033	2.54577		8.96226
							N	36	36	36	36		36	36	36	36		34	34	34	34		33	33	33	33	34	34	34	34		34	34	34	34	34	34	34	34		35
							SEM	1.07237	0.958624	1.29919	1.92116		0.427453	0.420669	0.28062	0.654283		0.0714381	0.0704814	0.0630469	0.107182		0.0355929	0.0351061	0.0351775	0.0474254	0.0301268	0.0614254	0.0578496	0.0528071		0.281722	0.30141	0.300412	0.565818	0.355887	0.254457	0.296749	0.436596		1.5149
						SynCrePOS	Average	10.2	12.3	11.2	23		2.3	2.35	2.3	4.65		0.611244	0.639345	0.606419	1.24818		1.31658	0.295895	0.279737	0.426474	1.39345	1.0039	0.9536	1.04275		9.01771	4.68187	4.86504	6.53008	9.03281	8.72982	7.93452	8.97263		30.865
							SD	5.3959	6.68147	6.58227	11.8943		2.10513	1.7252	1.89459	3.04398		0.321301	0.273762	0.244925	0.496285		0.173388	0.253357	0.184636	0.173906	0.153121	0.370236	0.338243	0.359632		1.73874	1.27223	0.933493	1.94653	2.03306	2.01994	1.54347	2.67466		7.36427
							N	20	20	20	20		20	20	20	20		20	20	20	20		19	19	19	19	20	20	20	20		20	20	20	20	19	19	19	19		19
							SEM	1.20656	1.49402	1.47184	2.65964		0.470722	0.385766	0.423643	0.680654		0.071845	0.0612152	0.054767	0.110973		0.0397778	0.0581241	0.0423584	0.0398967	0.0342389	0.0827872	0.0756333	0.0804161		0.388793	0.284479	0.208735	0.435258	0.466417	0.463406	0.354097	0.61361		1.68948
						LysCrePOS	Average	7.52632	8.31579	8	16.0789		1.10526	1.05263	1.15789	2.18421		0.722265	0.764992	0.758046	1.50515		1.25528	0.28705	0.306	0.547833	1.316	1.05567	1.11611	1.08822		9.19991	5.34361	5.45231	7.00287	9.46991	9.17866	8.32481	8.86218		30.0906
							SD	5.34757	4.83106	4.85341	7.84797		1.19697	1.61499	1.50049	2.51225		0.35199	0.378203	0.354127	0.657513		0.234927	0.181681	0.177868	0.23422	0.201363	0.329678	0.335748	0.374861		1.23396	1.50155	1.33433	2.00117	1.37072	1.57671	1.46473	1.84183		6.58557
							N	19	19	19	19		19	19	19	19		19	19	19	19		18	18	18	18	18	18	18	18		18	18	18	18	18	18	18	18		18
							SEM	1.22682	1.10832	1.11345	1.80045		0.274605	0.370504	0.344235	0.57635		0.080752	0.0867656	0.0812424	0.150844		0.0553728	0.0428226	0.041924	0.0552062	0.0474617	0.0777057	0.0791366	0.0883557		0.290848	0.353918	0.314505	0.471681	0.323082	0.371635	0.345239	0.434123		1.55223
					21
					22
					23
					24
					25
					26
					28
					29
					30
					31
					32
					33
					34
					35
					36

## Sheet: Figure3_Stats
Figure 3A
	Session Responding
	Active
	Mixed Model Analysis
	Fixed Effects
	Type III Tests of Fixed Effectsa
	Source	Numerator df	Denominator df	F	Sig.
	Intercept	1	210.995	415.902	8.61133e-52
	Genotype	2	210.995	8.40031	0.000308858
	Day	2	134.382	0.777332	0.461686
	Genotype * Day	4	134.382	0.24062	0.914884
	a. Dependent Variable: Active.
	Pairwise Comparisonsa
	(I) Genotype		Mean Difference (I-J)	Std. Error	df	Sig.c	95% Confidence Interval for Differencec
							Lower Bound	Upper Bound
	Cre Neg	Syn Cre+	-4.030*	0.999137	210.995	0.000230751	-6.44077	-1.61849
		LysM Cre+	-0.743665	1.0159	210.995	1	-3.19525	1.70792
	Syn Cre+	Cre Neg	4.030*	0.999137	210.995	0.000230751	1.61849	6.44077
		LysM Cre+	3.286*	1.14772	210.995	0.0138582	0.516254	6.05568
	LysM Cre+	Cre Neg	0.743665	1.0159	210.995	1	-1.70792	3.19525
		Syn Cre+	-3.286*	1.14772	210.995	0.0138582	-6.05568	-0.516254
	Based on estimated marginal means
	*. The mean difference is significant at the .05 level.
	a. Dependent Variable: Active.
	c. Adjustment for multiple comparisons: Bonferroni.
	Overall Responding
	Active
	2-Way ANOVA
	Tests of Between-Subjects Effects
	Dependent Variable:	AUC
	Source	Type III Sum of Squares	df	Mean Square	F	Sig.
	Corrected Model	7916.876a	5	1583.38	24.2976	1.28601e-17
	Intercept	15405.4	1	15405.4	236.402	5.04812e-32
	NosePoke	7011.01	1	7011.01	107.587	4.10739e-19
	Genotype	666.651	2	333.325	5.11503	0.00716048
	NosePoke * Genotype	371.299	2	185.65	2.84888	0.0612245
	Error	9253.55	142	65.1658
	Total	33008	148
	Corrected Total	17170.4	147
	a. R Squared = .461 (Adjusted R Squared = .442)
	Pairwise Comparisons
	Dependent Variable:	AUC
	(I) Genotype		Mean Difference (I-J)	Std. Error	Sig.b	95% Confidence Interval for Differenceb
						Lower Bound	Upper Bound
	Cre Neg	Syn Cre+	-4.881*	1.59193	0.00779755	-8.73727	-1.02384
		LysM Cre+	-0.333333	1.6478	1	-4.32541	3.65875
	Syn Cre+	Cre Neg	4.881*	1.59193	0.00779755	1.02384	8.73727
		LysM Cre+	4.547*	1.85454	0.0462657	0.054285	9.04016
	LysM Cre+	Cre Neg	0.333333	1.6478	1	-3.65875	4.32541
		Syn Cre+	-4.547*	1.85454	0.0462657	-9.04016	-0.054285
	Based on estimated marginal means
	*. The mean difference is significant at the .05 level.
	b. Adjustment for multiple comparisons: Bonferroni.
	Pairwise Comparisons
	Dependent Variable:	AUC
	NosePoke			Mean Difference (I-J)	Std. Error	Sig.b	95% Confidence Interval for Differenceb
							Lower Bound	Upper Bound
	Inactive	CreNeg	Neuronal	-1.09444	2.25132	1	-6.54866	4.35977
			Microglia	1.33333	2.33034	1	-4.31232	6.97899
		Neuronal	CreNeg	1.09444	2.25132	1	-4.35977	6.54866
			Microglia	2.42778	2.62271	1	-3.92619	8.78175
		Microglia	CreNeg	-1.33333	2.33034	1	-6.97899	4.31232
			Neuronal	-2.42778	2.62271	1	-8.78175	3.92619
	Active	CreNeg	Neuronal	-8.667*	2.25132	0.000534944	-14.1209	-3.21245
			Microglia	-2	2.33034	1	-7.64565	3.64565
		Neuronal	CreNeg	8.667*	2.25132	0.000534944	3.21245	14.1209
			Microglia	6.667*	2.62271	0.0362943	0.312694	13.0206
		Microglia	CreNeg	2	2.33034	1	-3.64565	7.64565
			Neuronal	-6.667*	2.62271	0.0362943	-13.0206	-0.312694
	Based on estimated marginal means
	*. The mean difference is significant at the .05 level.
	b. Adjustment for multiple comparisons: Bonferroni.
Figure 3B
	Heat
	Ipsilateral paw
	Mixed Model Analysis
	Fixed Effects
	Type III Tests of Fixed Effectsa
	Source	Numerator df	Denominator df	F	Sig.
	Intercept	1	152.809	1676.46	2.84485e-84
	Genotype	2	152.717	1.72214	0.182134
	Day	2	110.345	11.3741	3.22699e-05
	Genotype * Day	4	110.323	0.327748	0.858823
	a. Dependent Variable: PTIPSI.
	Pairwise Comparisonsa
	(I) Day		Mean Difference (I-J)	Std. Error	df	Sig.c	95% Confidence Interval for Differencec
							Lower Bound	Upper Bound
	3.00	6.00	0.0414956	0.260708	139.277	1	-0.590264	0.673255
		18.00	-1.666*	0.380717	110.8	8.25255e-05	-2.59137	-0.740421
	6.00	3.00	-0.0414956	0.260708	139.277	1	-0.673255	0.590264
		18.00	-1.707*	0.37423	106.1	4.09218e-05	-2.61772	-0.797065
	18.00	3.00	1.666*	0.380717	110.8	8.25255e-05	0.740421	2.59137
		6.00	1.707*	0.37423	106.1	4.09218e-05	0.797065	2.61772
	Based on estimated marginal means
	*. The mean difference is significant at the .05 level.
	a. Dependent Variable: PTIPSI.
	c. Adjustment for multiple comparisons: Bonferroni.
	Mechanical
	Ipsilateral paw
	Mixed Model Analysis
	Fixed Effects
	Type III Tests of Fixed Effectsa
	Source	Numerator df	Denominator df	F	Sig.
	Intercept	1	194.404	627.6	8.91549e-63
	Genotype	2	194.404	5.07045	0.00713581
	Day	2	124.698	17.6298	1.80813e-07
	Genotype * Day	4	124.698	0.501711	0.734518
	a. Dependent Variable: VFIPSI.
	Pairwise Comparisonsa
	(I) Genotype		Mean Difference (I-J)	Std. Error	df	Sig.c	95% Confidence Interval for Differencec
							Lower Bound	Upper Bound
	CreNeg	Syn	.111*	0.0358175	194.404	0.00659468	0.024662	0.197652
		LysM	0.0648975	0.0364435	194.404	0.229534	-0.0231089	0.152904
	Syn	CreNeg	-.111*	0.0358175	194.404	0.00659468	-0.197652	-0.024662
		LysM	-0.0462594	0.0409087	194.404	0.778603	-0.145049	0.05253
	LysM	CreNeg	-0.0648975	0.0364435	194.404	0.229534	-0.152904	0.0231089
		Syn	0.0462594	0.0409087	194.404	0.778603	-0.05253	0.145049
	Based on estimated marginal means
	*. The mean difference is significant at the .05 level.
	a. Dependent Variable: VFIPSI.
	c. Adjustment for multiple comparisons: Bonferroni.
	Pairwise Comparisonsa
	(I) Day		Mean Difference (I-J)	Std. Error	df	Sig.c	95% Confidence Interval for Differencec
							Lower Bound	Upper Bound
	3.00	6.00	-0.0108196	0.0354623	132.617	1	-0.0968059	0.0751667
		18.00	-.211*	0.0397202	132.05	1.33684e-06	-0.307346	-0.114714
	6.00	3.00	0.0108196	0.0354623	132.617	1	-0.0751667	0.0968059
		18.00	-.200*	0.0380693	127.766	1.77385e-06	-0.292563	-0.107857
	18.00	3.00	.211*	0.0397202	132.05	1.33684e-06	0.114714	0.307346
		6.00	.200*	0.0380693	127.766	1.77385e-06	0.107857	0.292563
	Based on estimated marginal means
	*. The mean difference is significant at the .05 level.
	a. Dependent Variable: VFIPSI.
