# Supplementary material for: Protective role of neuronal and lymphoid cannabinoid CB2 receptors in neuropathic pain
Source: eLife journal article supplement (doi:10.7554/elife.55582), 2020-07-20
Supplement: supp [file elife-55582-supp-v1.zip › elife_poa_e55582_Figure_4_figure_supplement_1_source_data_1.xlsx]

## Sheet: Figure 4-figure suppl1_RawData
	Supplementary Figure 4b																Supplementary Figure 4c																							Supplementary Figure 4d
	4 weeks					8 weeks					12 weeks
																	MICE	N
	Experiment Name	4weeks PB analysis_CB2				Experiment Name	8weeks PB analysis_CB2				Experiment Name	12weeks PB analysis_CB2					CB2-GFP	6
	Specimen Name	cb2 bmtp				Specimen Name	cb2 bmtp				Specimen Name	cb2 bmtp					C57BL/6J	4																						12 WEEKS
	Tube Name	Cnn				Tube Name	Cnn				Tube Name	Cnn
	Populations	#Events	%Parent	FITC-A Mean		Populations	#Events	%Parent	FITC-A Mean		Populations	#Events	%Parent	GFP FITC-A Mean			NºReg	Sex	Line	Marks	Surgery	Bone marrow Donor																			Populations	Single cell	DAPI -	GFP -	GFP+	No GFP B Cells	No GFP Macrophages	No GFP T Cells	GFP B Cells
	All Events	88831		241		All Events	127353		76		All Events	32138		1200			160023426	Male	C57BL/6J	Enn	PSNL	GFP																		Cnn	#Events	22477	19198	19181	17	355	15906	2535	6
	Singles	39594	44.6	118		Singles	57241	44.9	60		Singles	22477	69.9	452			160023427	Male	C57BL/6J	E1r	PSNL																			C1r	#Events	33077	30029	29578	451	10827	11576	6217	423
	DAPI-	21183	87.5	102		DAPI-	38694	96.7	71		DAPI-	19198	97.4	367			160023428	Male	C57BL/6J	E1l	PSNL																			C1l	#Events	28222	26939	26744	195	6855	16752	2572	179
	gfp+	27	0.1	1153		gfp+	117	0.3	461		gfp+	17	0.1	2337			160024011	Male	C57BL/6J	Gnn	SHAM																			C1R1L	#Events	26782	25280	25225	55	10738	8558	5003	46
	T-1	4	14.8	796		T-1	14	12	522		T-1	2	11.8	2032			160024012	Male	C57BL/6J	G1r	SHAM
	B-1	9	33.3	1995		B-1	35	29.9	458		B-1	6	35.3	2223			160024013	Male	C57BL/6J	G1l	SHAM																				AVERAGE	27639.5	25361.5	25182	179.5	7193.75	13198	4081.75	163.5
	M-1	8	29.6	689		M-1	36	30.8	429		M-1	7	41.2	2389			160024645	Male	C57BL/6J	Cnn	SHAM	C57Bl6																			N	4	4	4	4	4	4	4	4
	NOT(gfp+)	21156	99.9	101		NOT(gfp+)	38577	99.7	69		NOT(gfp+)	19181	99.9	366			160024646	Male	C57BL/6J	C1r	PSNL																				StDev	4370.07	4555.93	4388.57	196.519	4920.89	3835.13	1833.01	188.143
	T	6418	30.3	90		T	16080	41.7	55		T	2535	13.2	369			160024647	Male	C57BL/6J	C1l	SHAM																				SEM	2185.03	2277.96	2194.28	98.2594	2460.44	1917.56	916.505	94.0713
	B	502	2.4	185		B	1462	3.8	147		B	355	1.9	1053			160024648	Male	C57BL/6J	C1r1l	PSNL
	M	9570	45.2	118		M	17031	44.1	80		M	15906	82.9	350
																																								Enn	#Events	29539	22849	3466	19383	55	340	2367	15648
																																								E1r	#Events	29549	27815	4578	23237	58	717	3595	10917
	Experiment Name	4weeks PB analysis_CB2				Experiment Name	8weeks PB analysis_CB2				Experiment Name	12weeks PB analysis_CB2																												E1l	#Events	34681	24537	4281	20256	50	460	3434	12369
	Specimen Name	cb2 bmtp				Specimen Name	cb2 bmtp				Specimen Name	cb2 bmtp							MACROPHAGES							B CELLS							T CELLS							Gnn	#Events	28855	24414	4154	20260	50	669	3275	14629
	Tube Name	C1r				Tube Name	C1r				Tube Name	C1r																												G1r	#Events	31415	28600	6590	22010	631	677	5008	13848
	Populations	#Events	%Parent	FITC-A Mean		Populations	#Events	%Parent	FITC-A Mean		Populations	#Events	%Parent	GFP FITC-A Mean					4 weeks	8 weeks	12 weeks	4 weeks	8 weeks	12 weeks		4 weeks	8 weeks	12 weeks	4 weeks	8 weeks	12 weeks		4 weeks	8 weeks	12 weeks	4 weeks	8 weeks	12 weeks		G1r_001	#Events	27874	24903	3695	21208	40	371	3200	13170
	All Events	47750		232		All Events	76975		101		All Events	46025		1059				Populations	GFP Macrophages	GFP Macrophages	GFP Macrophages	No GFP Macrophages	No GFP Macrophages	No GFP Macrophages		GFP B Cells	GFP B Cells	GFP B Cells	No GFP B Cells	No GFP B Cells	No GFP B Cells		GFP T Cells	GFP T Cells	GFP T Cells	No GFP T Cells	No GFP T Cells	No GFP T Cells
	Singles	34529	72.3	153		Singles	55764	72.4	101		Singles	33077	71.9	666			Cnn	%Parent	8	36	7	9570	17031	15906		9	35	6	502	1462	355		4	14	2	6418	16080	2535			AVERAGE	30318.8	25519.7	4460.67	21059	147.333	539	3479.83	13430.2
	DAPI-	29602	94.3	142		DAPI-	48423	96.8	103		DAPI-	30029	99.3	683			C1r	%Parent	13	28	1	10109	11672	11576		80	282	423	11545	24541	10827		5	37	7	4920	8949	6217			N	6	6	6	6	6	6	6	6
	gfp+	105	0.4	2140		gfp+	356	0.7	606		gfp+	451	1.5	2535			C1l	%Parent	13	14	1	15178	7194	16752		7	119	179	1173	14280	6855		4	15	7	4653	4512	2572			StDev	2431.09	2211.69	1118.01	1397.32	237.026	168.341	861.315	1675.73
	T-1	5	4.8	1863		T-1	37	10.4	499		T-1	7	1.6	2273			C1R1L	%Parent	6	8	5	6683	8044	8558		28	36	46	8050	13831	10738		3	5	2	4527	2895	5003			SEM	992.486	902.919	456.427	570.452	96.7656	68.7251	351.63	684.114
	B-1	80	76.2	2243		B-1	282	79.2	644		B-1	423	93.8	2515
	M-1	13	12.4	1666		M-1	28	7.9	450		M-1	1	0.2	4025				AVERAGE	10	21.5	3.5	10385	10985.2	13198		31	118	163.5	5317.5	13528.5	7193.75		4	17.75	4.5	5129.5	8109	4081.75
	NOT(gfp+)	29497	99.6	135		NOT(gfp+)	48067	99.3	99		NOT(gfp+)	29578	98.5	655				N	4	4	4	4	4	4		4	4	4	4	4	4		4	4	4	4	4	4
	T	4920	16.7	133		T	8949	18.6	60		T	6217	21	317				StDev	3.55903	12.7932	3	3531.67	4473.9	3835.13		34.0098	116.204	188.143	5373.21	9443.37	4920.89		0.816497	13.5984	2.88675	874.487	5898.21	1833.01
	B	11545	39.1	167		B	24541	51.1	130		B	10827	36.6	1181				SEM	1.77951	6.39661	1.5	1765.83	2236.95	1917.56		17.0049	58.1019	94.0713	2686.61	4721.69	2460.44		0.408248	6.7992	1.44338	437.243	2949.11	916.505
	M	10109	34.3	109		M	11672	24.3	75		M	11576	39.1	362
																	Enn	%Parent	2712	5413	2118	452	134	340		11920	16965	15648	763	143	55		705	1237	1129	5169	3181	2367
																	E1r	%Parent	5543	5129	9968	562	153	717		15408	17495	10917	373	211	58		662	1275	1662	3590	3335	3595
	Experiment Name	4weeks PB analysis_CB2				Experiment Name	8weeks PB analysis_CB2				Experiment Name	12weeks PB analysis_CB2					E1l	%Parent	11156	7741	5895	1159	248	460		11549	15508	12369	372	251	50		488	1088	1499	2297	2625	3434
	Specimen Name	cb2 bmtp				Specimen Name	cb2 bmtp				Specimen Name	cb2 bmtp					Gnn	%Parent	5577	4372	3871	833	368	669		3744	6233	14629	129	69	50		150	550	1444	1383	1410	3275
	Tube Name	C1l				Tube Name	C1l				Tube Name	C1l					G1r	%Parent	1748	3613	6068	204	288	677		4768	14497	13848	112	1049	631		184	2136	1583	1715	5316	5008
	Populations	#Events	%Parent	FITC-A Mean		Populations	#Events	%Parent	FITC-A Mean		Populations	#Events	%Parent	GFP FITC-A Mean			G1l	%Parent	3125	3185	6185	240	149	371		3630	15931	13170	112	151	40		317	1698	1296	1384	5709	3200
	All Events	71152		239		All Events	88082		67		All Events	35575		930
	Singles	37261	52.4	120		Singles	43441	49.3	78		Singles	28222	79.3	571				AVERAGE	4976.83	4908.83	5684.17	575	223.333	539		8503.17	14438.2	13430.2	310.167	312.333	147.333		417.667	1330.67	1435.5	2589.67	3596	3479.83
	DAPI-	24974	95	110		DAPI-	29067	96.9	96		DAPI-	26939	99.3	565				N	6	6	6	6	6	6		6	6	6	6	6	6		6	6	6	6	6	6
	gfp+	27	0.1	1159		gfp+	154	0.5	432		gfp+	195	0.7	2331				StDev	3401.38	1628.67	2638.14	366.82	93.9908	168.341		5078.93	4157.65	1675.73	254.633	366.23	237.026		238.153	541.054	195.226	1510.89	1636.15	861.315
	T-1	4	14.8	727		T-1	15	9.7	430		T-1	7	3.6	2053				SEM	1388.61	664.901	1077.02	149.754	38.3716	68.7251		2073.46	1697.36	684.114	103.954	149.513	96.7656		97.2257	220.884	79.7006	616.82	667.956	351.63
	B-1	7	25.9	1791		B-1	119	77.3	439		B-1	179	91.8	2287
	M-1	13	48.1	1041		M-1	14	9.1	404		M-1	1	0.5	2066							4 weeks	8 weeks	12 weeks					4 weeks	8 weeks	12 weeks					4 weeks	8 weeks	12 weeks
	NOT(gfp+)	24947	99.9	109		NOT(gfp+)	28913	99.5	94		NOT(gfp+)	26744	99.3	552						C57BL/6J	0.0962001	0.195335	0.0265121				C57BL/6J	0.579602	0.864691	2.2223				C57BL/6J	0.0779195	0.218414	0.110125
	T	4653	18.7	80		T	4512	15.6	62		T	2572	9.6	348							0.0177951	0.0639661	0.015					0.170049	0.581019	0.940713					0.00408248	0.067992	0.0144338
	B	1173	4.7	154		B	14280	49.4	123		B	6855	25.6	1135						CB2-GFP	89.6431	95.6484	91.3388				CB2-GFP	96.4807	97.8826	98.9149				CB2-GFP	13.8883	27.0095	29.2045
	M	15178	60.8	122		M	7194	24.9	81		M	16752	62.6	350							13.8861	6.64901	10.7702					20.7346	16.9736	6.84114					0.972257	2.20884	0.797006
																												4	8	12
		Experiment Name	4weeks PB analysis_CB2			Experiment Name	8weeks PB analysis_CB2				Experiment Name	12weeks PB analysis_CB2														GFP+	Macrophages	89.6431	95.6484	91.3388
		Specimen Name	cb2 bmtp			Specimen Name	cb2 bmtp				Specimen Name	cb2 bmtp															SEM	13.8861	6.64901	10.7702
	Tube Name	C1R1L				Tube Name	C1R1L				Tube Name	C1R1L															B cells	96.4807	97.8826	98.9149
	Populations	#Events	%Parent	FITC-A Mean		Populations	#Events	%Parent	FITC-A Mean		Populations	#Events	%Parent	GFP FITC-A Mean													SEM	20.7346	16.9736	6.84114
	All Events	47750		249		All Events	31584		158		All Events	34650		1049													T cells	13.8883	27.0095	29.2045
	Singles	27837	58.3	134		Singles	29687	94	113		Singles	26782	77.3	575													SEM	0.972257	2.20884	0.797006
	DAPI-	21903	95.2	125		DAPI-	25840	89.3	86		DAPI-	25280	99.1	576												GFP-	Macrophages	0.0962001	0.195335	0.0265121
	gfp+	43	0.2	751		gfp+	53	0.2	508		gfp+	55	0.2	2523													SEM	0.0177951	0.0639661	0.015
	T-1	3	7	1110		T-1	5	9.4	400		T-1	2	3.6	2183													B cells	0.579602	0.864691	2.2223
	B-1	28	65.1	644		B-1	36	67.9	553		B-1	46	83.6	2564													SEM	0.170049	0.581019	0.940713
	M-1	6	14	592		M-1	8	15.1	393		M-1	5	9.1	2395													T cells	0.0779195	0.218414	0.110125
	NOT(gfp+)	21860	99.8	123		NOT(gfp+)	25787	99.8	86		NOT(gfp+)	25225	99.8	571													SEM	0.00408248	0.067992	0.0144338
	T	4527	20.7	113		T	2895	11.2	64		T	5003	19.8	282
	B	8050	36.8	154		B	13831	53.6	103		B	10738	42.6	906
	M	6683	30.6	109		M	8044	31.2	65		M	8558	33.9	337
	Experiment Name	4weeks PB analysis_CB2				Experiment Name	8weeks PB analysis_CB2				Experiment Name	12weeks PB analysis_CB2
	Specimen Name	cb2 bmtp				Specimen Name	cb2 bmtp				Specimen Name	cb2 bmtp
	Tube Name	Enn				Tube Name	Enn				Tube Name	Enn
	Populations	#Events	%Parent	FITC-A Mean		Populations	#Events	%Parent	FITC-A Mean		Populations	#Events	%Parent	GFP FITC-A Mean
	All Events	66656		2949		All Events	112094		479		All Events	43350		8194
	Singles	30162	45.3	1830		Singles	36469	32.5	1133		Singles	29539	68.1	5990
	DAPI-	24051	99.5	2206		DAPI-	29032	96.8	1389		DAPI-	22849	97.7	7475
	gfp+	16733	69.6	3124		gfp+	24329	83.8	1646		gfp+	19383	84.8	8713
	T-1	705	4.2	1897		T-1	1237	5.1	1095		T cell	1129	5.8	4122
	B-1	11920	71.2	3590		B-1	16965	69.7	1880		B cell	15648	80.7	9539
	M-1	2712	16.2	2010		M-1	5413	22.2	1130		Myeloid	2118	10.9	6178
	NOT(gfp+)	7318	30.4	109		NOT(gfp+)	4703	16.2	101		NOT(gfp+)	3466	15.2	549
	T	5169	70.6	104		T	3181	67.6	118		T	2367	68.3	599
	B	763	10.4	185		B	143	3	209		B	55	1.6	793
	M	452	6.2	101		M	134	2.8	190		M	340	9.8	421
	Experiment Name	4weeks PB analysis_CB2				Experiment Name	8weeks PB analysis_CB2				Experiment Name	12weeks PB analysis_CB2
	Specimen Name	cb2 bmtp				Specimen Name	cb2 bmtp				Specimen Name	cb2 bmtp
	Tube Name	E1R				Tube Name	E1R				Tube Name	E1R
	Populations	#Events	%Parent	FITC-A Mean		Populations	#Events	%Parent	FITC-A Mean		Populations	#Events	%Parent	GFP FITC-A Mean
	All Events	49384		3234		All Events	34918		1438		All Events	38075		9806
	Singles	33052	66.9	2226		Singles	30870	88.4	1329		Singles	29549	77.6	6722
	DAPI-	27889	92.6	2502		DAPI-	28954	96.5	1389		DAPI-	27815	99	6931
	gfp+	22563	80.9	3065		gfp+	24759	85.5	1605		gfp+	23237	83.5	8170
	T-1	662	2.9	2103		T-1	1275	5.1	984		T cell	1662	7.2	3463
	B-1	15408	68.3	3464		B-1	17495	70.7	1811		B cell	10917	47	11727
	M-1	5543	24.6	2243		M-1	5129	20.7	1170		Myeloid	9968	42.9	5252
	NOT(gfp+)	5326	19.1	118		NOT(gfp+)	4195	14.5	118		NOT(gfp+)	4578	16.5	640
	T	3590	67.4	108		T	3335	79.5	113		T	3595	78.5	625
	B	373	7	264		B	211	5	203		B	58	1.3	950
	M	562	10.6	117		M	153	3.6	209		M	717	15.7	731
	Experiment Name	4weeks PB analysis_CB2				Experiment Name	8weeks PB analysis_CB2				Experiment Name	12weeks PB analysis_CB2
	Specimen Name	cb2 bmtp				Specimen Name	cb2 bmtp				Specimen Name	cb2 bmtp
	Tube Name	E1l				Tube Name	E1L				Tube Name	E1L
	Populations	#Events	%Parent	FITC-A Mean		Populations	#Events	%Parent	FITC-A Mean		Populations	#Events	%Parent	GFP FITC-A Mean
	All Events	45187		2809		All Events	36103		1454		All Events	44900		7203
	Singles	32789	72.6	2151		Singles	31035	86	1266		Singles	34681	77.2	5222
	DAPI-	28274	94.2	2360		DAPI-	29081	96.9	1335		DAPI-	24537	98.5	7146
	gfp+	23921	84.6	2765		gfp+	25337	87.1	1515		gfp+	20256	82.6	8530
	T-1	488	2	2181		T-1	1088	4.3	939		T cell	1499	7.4	3625
	B-1	11549	48.3	3577		B-1	15508	61.2	1826		B cell	12369	61.1	10642
	M-1	11156	46.6	1996		M-1	7741	30.6	1050		Myeloid	5895	29.1	5650
	NOT(gfp+)	4353	15.4	133		NOT(gfp+)	3744	12.9	124		NOT(gfp+)	4281	17.4	600
	T	2297	52.8	107		T	2625	70.1	117		T	3434	80.2	617
	B	372	8.5	230		B	251	6.7	183		B	50	1.2	1963
	M	1159	26.6	177		M	248	6.6	209		M	460	10.7	477
	Experiment Name	4weeks PB analysis_CB2				Experiment Name	8weeks PB analysis_CB2				Experiment Name	12weeks PB analysis_CB2
	Specimen Name	cb2 bmtp				Specimen Name	cb2 bmtp				Specimen Name	cb2 bmtp
	Tube Name	Gnn				Tube Name	Gnn				Tube Name	Gnn
	Populations	#Events	%Parent	FITC-A Mean		Populations	#Events	%Parent	FITC-A Mean		Populations	#Events	%Parent	GFP FITC-A Mean
	All Events	25025		1979		All Events	103047		283		All Events	40025		10194
	Singles	16154	64.6	1463		Singles	67123	65.1	329		Singles	28855	72.1	6927
	DAPI-	12774	93	1752		DAPI-	14329	97.4	629		DAPI-	24414	96.8	7877
	gfp+	9922	77.7	2217		gfp+	11343	79.2	1763		gfp+	20260	83	9373
	T-1	150	1.5	2260		T-1	550	4.8	991		T cell	1444	7.1	3935
	B-1	3744	37.7	3321		B-1	6233	55	2246		B cell	14629	72.2	10632
	M-1	5577	56.2	1523		M-1	4372	38.5	1207		Myeloid	3871	19.1	6843
	NOT(gfp+)	2852	22.3	136		NOT(gfp+)	2986	20.8	25		NOT(gfp+)	4154	17	578
	T	1383	48.5	72		T	1410	47.2	119		T	3275	78.8	592
	B	129	4.5	262		B	69	2.3	178		B	50	1.2	1074
	M	833	29.2	265		M	368	12.3	149		M	669	16.1	513
	Experiment Name	4weeks PB analysis_CB2				Experiment Name	8weeks PB analysis_CB2				Experiment Name	12weeks PB analysis_CB2
	Specimen Name	cb2 bmtp				Specimen Name	cb2 bmtp				Specimen Name	cb2 bmtp
	Tube Name	G1r				Tube Name	G1r				Tube Name	G1r
	Populations	#Events	%Parent	FITC-A Mean		Populations	#Events	%Parent	FITC-A Mean		Populations	#Events	%Parent	GFP FITC-A Mean
	All Events	22425		2524		All Events	46948		2490		All Events	40931		8451
	Singles	12506	55.8	1740		Singles	32176	68.5	1601		Singles	31415	76.8	6225
	DAPI-	9488	92.4	2181		DAPI-	28361	94.1	1749		DAPI-	28600	97.6	6563
	gfp+	7073	74.5	2891		gfp+	20939	73.8	2326		gfp+	22010	77	8339
	T-1	184	2.6	2101		T-1	2136	10.2	1023		T cell	1583	7.2	3555
	B-1	4768	67.4	3289		B-1	14497	69.2	2705		B cell	13848	62.9	10048
	M-1	1748	24.7	2083		M-1	3613	17.3	1763		Myeloid	6068	27.6	5947
	NOT(gfp+)	2415	25.5	101		NOT(gfp+)	7422	26.2	121		NOT(gfp+)	6590	23	634
	T	1715	71	96		T	5316	71.6	124		T	5008	76	602
	B	112	4.6	272		B	1049	14.1	145		B	631	9.6	1015
	M	204	8.4	153		M	288	3.9	111		M	677	10.3	488
	Experiment Name	4weeks PB analysis_CB2				Experiment Name	8weeks PB analysis_CB2				Experiment Name	12weeks PB analysis_CB2
	Specimen Name	cb2 bmtp				Specimen Name	cb2 bmtp				Specimen Name	cb2 bmtp
	Tube Name	G1l				Tube Name	G1l				Tube Name	G1l
	Populations	#Events	%Parent	FITC-A Mean		Populations	#Events	%Parent	FITC-A Mean		Populations	#Events	%Parent	GFP FITC-A Mean
	All Events	22175		2364		All Events	45660		2239		All Events	33425		7603
	Singles	13605	61.4	1588		Singles	31506	69	1255		Singles	27874	83.4	7410
	DAPI-	9782	89.3	2017		DAPI-	28670	95.3	1340		DAPI-	24903	97.7	7880
	gfp+	7697	78.7	2529		gfp+	21799	76	1727		gfp+	21208	85.2	9142
	T-1	317	4.1	1660		T-1	1698	7.8	799		T cell	1296	6.1	4411
	B-1	3630	47.2	3245		B-1	15931	73.1	1937		B cell	13170	62.1	11174
	M-1	3125	40.6	1920		M-1	3185	14.6	1383		Myeloid	6185	29.2	5895
	NOT(gfp+)	2085	21.3	126		NOT(gfp+)	6871	24	110		NOT(gfp+)	3695	14.8	637
	T	1384	66.4	138		T	5709	83.1	113		T	3200	86.6	623
	B	112	5.4	212		B	151	2.2	187		B	40	1.1	998
	M	240	11.5	132		M	149	2.2	147		M	371	10	618
[truncated: 6 more columns]
