# Supplementary material for: Protective role of neuronal and lymphoid cannabinoid CB2 receptors in neuropathic pain
Source: eLife journal article supplement (doi:10.7554/elife.55582), 2020-07-20
Supplement: supp [file elife-55582-supp-v1.zip › elife_poa_e55582_Figure_4_source_data_1.xlsx]

## Sheet: Figure4_RawData
		Figure 4A							Figure 4B					Figure 4C							Figure 4D
		Non-neuronal GFP+ detected					Number of GFP (+) cells /																Ratio Neuronal GFP+/ Neurons
B6 SH			% area	Photo area (u2)	Area DRG (u2)	Area DRG (mm2)	DRG area (mm2)												B6 SH		Neurons	Neurons GFP(+)		GFP (+) Neurons (%)
Immuno 1 IL3	B_Cnn_IL3_B6_SH_1	1	76.76	546920	419816	0.419816	2.382		Macrophages	GFP (-)	GFP (+)	TOTAL		Lymphocytes	GFP (-)	GFP (+)	TOTAL		Immuno 1 IL3	B_Cnn_IL3_B6_SH_1	61	0	0	0
	B_Cnn_IL3_B6_SH_2	0	84.41	546920	461655	0.461655	0		E1r GFP PSNL IL5	0	1	1		E1r GFP PSNL IL3	4	1	5			B_Cnn_IL3_B6_SH_2	59	1	0.0169492	1.69492
	D_Cnn_IL3_B6_SH_1	0	84.45	546920	461874	0.461874	0		E1r GFP PSNL IL5	1	3	4		E1r GFP PSNL IL3	0	1	1			D_Cnn_IL3_B6_SH_1	76	0	0	0
Immuno 2 IL3	B_C1l_IL3_B6_SH_1	0	86.26	546920	471773	0.471773	0		E1r GFP PSNL IL5	0	1	1		E1r GFP PSNL IL3	2	1	3		Immuno 2 IL3	B_C1l_IL3_B6_SH_1	43	0	0	0
	B_C1l_IL3_B6_SH_2	4	69.88	546920	382188	0.382188	10.4661		E1r GFP PSNL IL5	0	2	2		E1r GFP PSNL IL3	1	1	2			B_C1l_IL3_B6_SH_2	42	0	0	0
	B_C1l_IL3_B6_SH_3	0	47.28	546920	258584	0.258584	0		E1r GFP PSNL IL3	0	1	1		E1r GFP PSNL IL3	1	1	2			B_C1l_IL3_B6_SH_3	82	0	0	0
	B_C1l_IL3_B6_SH_4	0	77.65	546920	424683	0.424683	0		E1r GFP PSNL IL3	5	5	10		E1r GFP PSNL IL3	5	3	8			B_C1l_IL3_B6_SH_4	117	0	0	0
	B_C1l_IL3_B6_SH_5	0	81.27	546920	444482	0.444482	0		E1r GFP PSNL IL3	3	1	4								B_C1l_IL3_B6_SH_5	63	0	0	0
	D_C1l_IL3_B6_SH_1	0	74.53	546920	407619	0.407619	0		E1r GFP PSNL IL3	0	1	1		AVERAGE	13	8	21			D_C1l_IL3_B6_SH_1	74	0	0	0
	D_C1l_IL3_B6_SH_2	0	78.89	546920	431465	0.431465	0							StDev	1.94079	0.816497				D_C1l_IL3_B6_SH_2	59	0	0	0
	D_C1l_IL3_B6_SH_3	0	70.61	546920	386180	0.38618	0		AVERAGE	9	15	24		N	6	6				D_C1l_IL3_B6_SH_3	70	0	0	0
	D_C1l_IL3_B6_SH_4	0	81.93	546920	448091	0.448091	0		StDev	1.88509	1.45774			SEM	0.792324	0.333333				D_C1l_IL3_B6_SH_4	145	0	0	0
						AVERAGE	1.07067		N	6	6												AVERAGE	0.141243
						StDev	3.03699		SEM	0.769586	0.595119				%	%							StDev	0.48928
						N	12								61.9048	38.0952							N	12
						SEM	0.876703			%	%												SEM	0.141243
										37.5	62.5
B6 PSNL																			B6 PSNL
Immuno 1 IL3	B_C1r_IL3_B6_PSNL_1	0	76	546920	415659	0.415659	0												Immuno 1 IL3	B_C1r_IL3_B6_PSNL_1	41	0	0	0
	B_C1r_IL3_B6_PSNL_2	0	73.35	546920	401166	0.401166	0													B_C1r_IL3_B6_PSNL_2	45	0	0	0
	D_C1r_IL3_B6_PSNL_1	0	70.35	546920	384758	0.384758	0													D_C1r_IL3_B6_PSNL_1	95	0	0	0
	D_C1r_IL3_B6_PSNL_2	3	75.57	546920	413307	0.413307	7.25852													D_C1r_IL3_B6_PSNL_2	76	1	0.0131579	1.31579
Immuno 2 IL3	B_C1r1l_IL3_B6_PSNL_1	1	56.35	546920	308189	0.308189	3.24476												Immuno 2 IL3	B_C1r1l_IL3_B6_PSNL_1	79	0	0	0
	D_C1r1l_IL3_B6_PSNL_1	0	54.7	546920	299165	0.299165	0													D_C1r1l_IL3_B6_PSNL_1	87	0	0	0
Immuno IL4	E_C1r_IL4_B6_PSNL_1	1	66.25	546920	362334	0.362334	2.75988												Immuno IL4	E_C1r_IL4_B6_PSNL_1	83	0	0	0
	E_C1r_IL4_B6_PSNL_2	0	87.54	546920	478774	0.478774	0													E_C1r_IL4_B6_PSNL_2	91	0	0	0
	E_C1r_IL4_B6_PSNL_3	0	85.28	546920	466413	0.466413	0													E_C1r_IL4_B6_PSNL_3	67	0	0	0
						AVERAGE	1.47368																AVERAGE	0.146199
						StDev	2.53194																StDev	0.438596
						N	9																N	9
						SEM	0.843981																SEM	0.146199
GFP SH																			GFP SH
Immuno 1 IL3	B_G1l_IL3_GFP_SH_1	0	79.7	546920	435895	0.435895	0												Immuno 1 IL3	B_G1l_IL3_GFP_SH_1	88	0	0	0
	B_G1l_IL3_GFP_SH_2	0	70.19	546920	383883	0.383883	0													B_G1l_IL3_GFP_SH_2	95	0	0	0
	B_G1l_IL3_GFP_SH_3	0	80	546920	437536	0.437536	0													B_G1l_IL3_GFP_SH_3	25	0	0	0
	B_G1l_IL3_GFP_SH_4	0	77.54	546920	424082	0.424082	0													B_G1l_IL3_GFP_SH_4	48	0	0	0
	B_G1r_IL3_GFP_SH_1	0	45.2	546920	247208	0.247208	0													B_G1r_IL3_GFP_SH_1	40	0	0	0
	B_G1r_IL3_GFP_SH_2	1	64.92	546920	355060	0.35506	2.81642													B_G1r_IL3_GFP_SH_2	53	1	0.0188679	1.88679
	B_G1r_IL3_GFP_SH_3	0	56.29	546920	307861	0.307861	0													B_G1r_IL3_GFP_SH_3	96	1	0.0104167	1.04167
	B_G1r_IL3_GFP_SH_4	0	30.13	546920	164787	0.164787	0													B_G1r_IL3_GFP_SH_4	84	0	0	0
	B_Gnn_IL3_GFP_SH_1	2	68.31	546920	373601	0.373601	5.35331													B_Gnn_IL3_GFP_SH_1	35	1	0.0285714	2.85714
	D_G1r_IL3_GFP_SH_1	1	54.12	546920	295993	0.295993	3.37846													D_G1r_IL3_GFP_SH_1	66	0	0	0
	D_G1r_IL3_GFP_SH_2	1	78.68	546920	430317	0.430317	2.32387													D_G1r_IL3_GFP_SH_2	65	0	0	0
	D_G1r_IL3_GFP_SH_3	0	70.77	546920	387055	0.387055	0													D_G1r_IL3_GFP_SH_3	77	0	0	0
	D_G1r_IL3_GFP_SH_4	2	77.86	546920	425832	0.425832	4.69669													D_G1r_IL3_GFP_SH_4	61	2	0.0327869	3.27869
	D_Gnn_IL3_GFP_SH_1	5	77.88	546920	425941	0.425941	11.7387													D_Gnn_IL3_GFP_SH_1	100	2	0.02	2
	D_Gnn_IL3_GFP_SH_2	5	63.59	546920	347786	0.347786	14.3766													D_Gnn_IL3_GFP_SH_2	71	5	0.0704225	7.04225
Immuno 2 IL3	F_G1l_IL3_GFP_SH_1	5	80.45	546920	439997	0.439997	11.3637												Immuno 2 IL3	F_G1l_IL3_GFP_SH_1	90	2	0.0222222	2.22222
	F_G1l_IL3_GFP_SH_2	5	82.3	546920	450115	0.450115	11.1083													F_G1l_IL3_GFP_SH_2	103	2	0.0194175	1.94175
	F_Gnn_IL3_GFP_SH_1	7	51.29	546920	280515	0.280515	24.9541													F_Gnn_IL3_GFP_SH_1	64	0	0	0
	F_Gnn_IL3_GFP_SH_2	3	54.63	546920	298782	0.298782	10.0408													F_Gnn_IL3_GFP_SH_2	103	0	0	0
	F_Gnn_IL3_GFP_SH_3	1	55.88	546920	305619	0.305619	3.27205													F_Gnn_IL3_GFP_SH_3	57	0	0	0
	H_G1l_IL3_GFP_SH_1	17	79.18	546920	433051	0.433051	39.2563													H_G1l_IL3_GFP_SH_1	77	2	0.025974	2.5974
	H_G1l_IL3_GFP_SH_2	10	67.05	546920	366710	0.36671	27.2695													H_Gnn_IL3_GFP_SH_1	100	0	0	0
	H_Gnn_IL3_GFP_SH_1	5	60.43	546920	330504	0.330504	15.1284													H_Gnn_IL3_GFP_SH_2	69	1	0.0144928	1.44928
	H_Gnn_IL3_GFP_SH_2	4	67.53	546920	369335	0.369335	10.8303													H_Gnn_IL3_GFP_SH_3	96	0	0	0
	H_Gnn_IL3_GFP_SH_3	1	69.67	546920	381039	0.381039	2.6244													F_G1r_IL3_GFP_SH_1	73	3	0.0410959	4.10959
	F_G1r_IL3_GFP_SH_1	2	80.23	546920	438794	0.438794	4.55795													F_G1r_IL3_GFP_SH_2	95	0	0	0
	F_G1r_IL3_GFP_SH_2	1	78.64	546920	430098	0.430098	2.32505													F_G1r_IL3_GFP_SH_3	89	0	0	0
	F_G1r_IL3_GFP_SH_3	0	52.34	546920	286258	0.286258	0													F_G1r_IL3_GFP_SH_4	100	0	0	0
	F_G1r_IL3_GFP_SH_4	0	66.515	546920	363784	0.363784	0													H_G1r_IL3_GFP_SH_1	84	3	0.0357143	3.57143
	H_G1r_IL3_GFP_SH_1	11	61.56	546920	336684	0.336684	32.6716													H_G1r_IL3_GFP_SH_2	83	5	0.060241	6.0241
	H_G1r_IL3_GFP_SH_2	9	55.49	546920	303486	0.303486	29.6554													H_G1r_IL3_GFP_SH_3	81	10	0.123457	12.3457
	H_G1r_IL3_GFP_SH_3	30	81.93	546920	448091	0.448091	66.9506													H_G1r_IL3_GFP_SH_4	73	5	0.0684932	6.84932
	H_G1r_IL3_GFP_SH_4	25	70.26	546920	384266	0.384266	65.0591																AVERAGE	1.85054
Immuno IL4	C_G1l_IL4_GFP SH_1	0	37.07	546920	202743	0.202743	0																StDev	2.842
	C_G1l_IL4_GFP SH_2	0	42.43	546920	232058	0.232058	0																N	32
	C_Gnn_IL4_GFP_SH_1	0	17.48	546920	95601.6	0.0956016	0																SEM	0.502399
	C_Gnn_IL4_GFP_SH_2	0	35.03	546920	191586	0.191586	0
	C_Gnn_IL4_GFP_SH_3	4	37.96	546920	207611	0.207611	19.2668
Immuno IL5	C_IL5_GFP_SH_G1r_1	0	57.7	546920	315573	0.315573	0												GFP PSNL
	C_IL5_GFP_SH_G1r_2	0	45.69	546920	249888	0.249888	0												Immuno 1 IL3	B_E1r_IL3_GFP_PSNL_1	77	10	0.12987	12.987
	C_IL5_GFP_SH_G1r_3	0	72.13	546920	394493	0.394493	0													B_E1r_IL3_GFP_PSNL_2	70	7	0.1	10
	E_IL5_GFP_SH_G1r_1	0	73.54	546920	402205	0.402205	0													B_E1r_IL3_GFP_PSNL_3	92	5	0.0543478	5.43478
	E_IL5_GFP_SH_G1r_2	0	46.61	546920	254919	0.254919	0													B_E1r_IL3_GFP_PSNL_4	85	10	0.117647	11.7647
						AVERAGE	9.79113													B_Enn_IL3_GFP_PSNL_1	60	1	0.0166667	1.66667
						StDev	16.1699													B_Enn_IL3_GFP_PSNL_2	71	0	0	0
						N	43													B_Enn_IL3_GFP_PSNL_3	65	0	0	0
						SEM	2.46588													D_E1r_IL3_GFP_PSNL_1	55	0	0	0
																				D_E1r_IL3_GFP_PSNL_2	58	4	0.0689655	6.89655
																				D_E1r_IL3_GFP_PSNL_3	74	2	0.027027	2.7027
GFP PSNL																				D_Enn_IL3_GFP_PSNL_1	75	0	0	0
Immuno 1 IL3	B_E1r_IL3_GFP_PSNL_1	5	81	546920	443005	0.443005	11.2866													D_Enn_IL3_GFP_PSNL_2	48	5	0.104167	10.4167
	B_E1r_IL3_GFP_PSNL_2	14	80	546920	437536	0.437536	31.9974												Immuno 2 IL3	F_Enn_IL3_GFP_PSNL_1	75	1	0.0133333	1.33333
	B_E1r_IL3_GFP_PSNL_3	6	75.23	546920	411448	0.411448	14.5827													F_E1r_IL3_GFP_PSNL_1	72	5	0.0694444	6.94444
	B_E1r_IL3_GFP_PSNL_4	18	77.04	546920	421347	0.421347	42.7201													F_E1r_IL3_GFP_PSNL_2	84	5	0.0595238	5.95238
	B_Enn_IL3_GFP_PSNL_1	1	66.66	546920	364577	0.364577	2.74291													F_E1r_IL3_GFP_PSNL_3	46	2	0.0434783	4.34783
	B_Enn_IL3_GFP_PSNL_2	2	71.31	546920	390009	0.390009	5.12809													F_E1r_IL3_GFP_PSNL_4	108	5	0.0462963	4.62963
	B_Enn_IL3_GFP_PSNL_3	0	76.98	546920	421019	0.421019	0													F_E1r_IL3_GFP_PSNL_5	96	6	0.0625	6.25
	D_E1r_IL3_GFP_PSNL_1	18	69	546920	377375	0.377375	47.698													F_E1r_IL3_GFP_PSNL_6	59	2	0.0338983	3.38983
	D_E1r_IL3_GFP_PSNL_2	9	76.68	546920	419378	0.419378	21.4603													H_E1r_IL3_GFP_PSNL_1	50	1	0.02	2
	D_E1r_IL3_GFP_PSNL_3	14	81.32	546920	444755	0.444755	31.478													H_E1r_IL3_GFP_PSNL_2	59	2	0.0338983	3.38983
	D_Enn_IL3_GFP_PSNL_1	0	72.79	546920	398103	0.398103	0													H_E1r_IL3_GFP_PSNL_3	103	1	0.00970874	0.970874
	D_Enn_IL3_GFP_PSNL_2	3	60.507	546920	330925	0.330925	9.0655													H_E1r_IL3_GFP_PSNL_4	73	1	0.0136986	1.36986
Immuno 2 IL3	F_Enn_IL3_GFP_PSNL_1	0	56.96	546920	311526	0.311526	0													H_E1r_IL3_GFP_PSNL_5	44	0	0	0
	F_E1r_IL3_GFP_PSNL_1	21	70	546920	382844	0.382844	54.8526																AVERAGE	4.26863
	F_E1r_IL3_GFP_PSNL_2	32	62.42	546920	341387	0.341387	93.7352																StDev	3.95675
	F_E1r_IL3_GFP_PSNL_3	30	49.03	546920	268155	0.268155	111.876																N	24
	F_E1r_IL3_GFP_PSNL_4	40	64.05	546920	350302	0.350302	114.187																SEM	0.807668
	F_E1r_IL3_GFP_PSNL_5	35	70.28	546920	384375	0.384375	91.0569
	F_E1r_IL3_GFP_PSNL_6	10	43.08	546920	235613	0.235613	42.4425
	H_E1r_IL3_GFP_PSNL_1	32	41.17	546920	225167	0.225167	142.117
	H_E1r_IL3_GFP_PSNL_2	19	50	546920	273460	0.27346	69.48													GFP (+) Neurons (%)
	H_E1r_IL3_GFP_PSNL_3	20	81.28	546920	444536	0.444536	44.9907
	H_E1r_IL3_GFP_PSNL_4	7	70.14	546920	383610	0.38361	18.2477														C57Bl/6J SHAM	C57Bl/6J PSNL	CB2-GFP SHAM	CB2-GFP PSNL
	H_E1r_IL3_GFP_PSNL_5	4	80.69	546920	441310	0.44131	9.06393													AVERAGE	0.141243	0.146199	1.85054	4.26863
Immuno IL5	C_IL5_GFP_PSNL_E_1	1	88.29	546920	482876	0.482876	2.07093													SEM	0.141243	0.146199	0.502399	0.807668
	C_IL5_GFP_PSNL_E_2	0	49.01	546920	268045	0.268045	0
	C_IL5_GFP_PSNL_E_3	0	34.85	546920	190602	0.190602	0
	C_IL5_GFP_PSNL_E_4	0	81.44	546920	445411	0.445411	0
	C_IL5_GFP_PSNL_E_5	0	85.39	546920	467015	0.467015	0
	E_IL5_GFP_PSNL_E_1	1	41.66	546920	227847	0.227847	4.38891
	E_IL5_GFP_PSNL_E_2	0	84.37	546920	461436	0.461436	0
	E_IL5_GFP_PSNL_E_3	2	44.06	546920	240973	0.240973	8.29969
	E_IL5_GFP_PSNL_E_4	6	72.69	546920	397556	0.397556	15.0922
	G_IL5_GFP_PSNL_E_1	34	84.55	546920	462421	0.462421	73.5261
	G_IL5_GFP_PSNL_E_2	0	76.92	546920	420691	0.420691	0
	G_IL5_GFP_PSNL_E_3	2	54.72	546920	299275	0.299275	6.68283
	I_IL5_GFP_PSNL_E_1	2	81.82	546920	447490	0.44749	4.46938
	I_IL5_GFP_PSNL_E_2	1	81.01	546920	443060	0.44306	2.25703
						AVERAGE	29.6578
						StDev	38.3123
						N	38
						SEM	6.21508
		Number of GFP (+) cells / DRG area (mm2)
			C57Bl/6J SHAM	C57Bl/6J PSNL	CB2-GFP SHAM	CB2-GFP PSNL
		AVERAGE	1.07067	1.47368	9.79113	29.6578
		SEM	0.876703	0.843981	2.46588	6.21508

## Sheet: Figure4_Stats
	Figure 4A											Figure 4D
	GFP+ Non-neuronal cells											GFP+ neurons
	Multiple t-tests	Significant?	P value	Mean1	Mean2	Difference	SE of difference	t ratio	df	Adjusted P Value		Multiple t-tests	Significant?	P value	Mean1	Mean2	Difference	SE of difference	t ratio	df	Adjusted P Value
	BL6 Sham vs BL6 PSNL	No	0.935204	0.9179	1.894	-0.9764	12	0.08137	294	>0.999999		BL6 Sham vs BL6 PSNL	No	0.996913	0.1412	0.1462	-0.004956	1.28	0.003873	219	>0.999999
	GFP Sham vs GFP PSNL	Yes	0.000732	10.32	30.1	-19.79	5.797	3.413	294	0.004392		GFP Sham vs GFP PSNL	Yes	0.00229	1.851	4.269	-2.418	0.7835	3.086	219	0.013738
	BL6 Sham vs GFP Sham	No	0.244826	0.9179	10.27	-9.351	8.024	1.165	294	>0.999999		BL6 Sham vs GFP Sham	No	0.083223	0.1412	1.851	-1.709	0.9822	1.74	219	0.499339
	BL6 Sham vs GFP PSNL	Yes	0.001546	4.01	30.1	-26.09	8.165	3.196	294	0.009278		BL6 Sham vs GFP PSNL	Yes	7.9e-05	0.1412	4.269	-4.127	1.026	4.023	219	0.000474
	BL6 PSNL vs GFP PSNL	Yes	0.005529	5.141	30.1	-24.96	8.931	2.795	294	0.033175		BL6 PSNL vs GFP PSNL	Yes	0.000347	0.1462	4.269	-4.122	1.134	3.635	219	0.002081
	GFP Sham vs BL6 PSNL	No	0.479219	9.356	1.894	7.462	10.53	0.7085	294	>0.999999		GFP Sham vs BL6 PSNL	No	0.12098	1.851	0.1462	1.704	1.095	1.557	219	0.725883
	Statistical significance determined using the Bonferroni-Dunn method, with alpha = 0.05.											Statistical significance determined using the Bonferroni-Dunn method, with alpha = 0.05.
