# Supplementary material for: Protective role of neuronal and lymphoid cannabinoid CB2 receptors in neuropathic pain
Source: eLife journal article supplement (doi:10.7554/elife.55582), 2020-07-20
Supplement: supp [file elife-55582-supp-v1.zip › elife_poa_e55582_Figure_5_figure_supplement_1_source_data_1.xlsx]

## Sheet: Figure5_RawData
	SelfAdmin	Von Frey	Plantar	Plus Maze
	N	N	N	N
Control IgG	19	6	6	6
Anti-ICAM1	16	7	7	7
									Figure 5A															Figure 5B																		Figure 5C			Figure 5D
									Antibody Treatment																Antibody Treatment				Antibody Treatment					Antibody Treatment				Antibody Treatment							DRG mRNA
									JWH133 Self-administration															Von Frey test									Plantar test									Elevated Plus Maze			Number		CD2/HPRT	Relative CD2	CD4/HPRT
									Active Session Responding			Overall		Inactive Session Responding			Overall		Discrimination Index			Overall		VF IPSI				VF CONTRA					PT IPSI				PT CONTRA								1	Control IgG	0.000134696	0.366865	3.3536e-05
					Genotype	Mouse	Surgery	Treatment	day10	day11	day12	AUC LAST 3 days ACTIVE		day10	day11	day12	AUC LAST 3 days INACTIVE		day10	day11	day12	AUC LAST 3 days DI		Day-1	Day3	Day6	Day18	Day-1	Day3	Day6	Day18		Day-1	Day3	Day6	Day18	Day-1	Day3	Day6	Day18		% Entries Open Arms			2	Control IgG	0.00023122	0.62976	0.000117885
					C57BL/6J	X1	PSNL	Control IgG	17	18	15	34		0	2	3	3.5		1	0.8	0.666667	1.63333		1.513	0.272	0.223	1.086	1.513	1.513	1.392	1.241		7.58333	5.3725	5.18333	5.45667	8.94667	10.4467	8.18333	8.23667		1.84862			3	Control IgG	0.000544115	1.48197	0.000190614
					C57BL/6J	X2	PSNL	Control IgG	15	12	4	21.5		5	4	1	7		0.5	0.5	0.6	1.05		1.502	0.512	0.579	0.82	1.241	1.086	1.218	1.392		7.27	4.44667	5.45333	5.96667	7.6325	8.715	7.34667	9.5		16.0575			4	Control IgG	0.000615521	1.67646	7.06221e-05
					C57BL/6J	Y2	PSNL	Control IgG	5	9	7	15		2	1	5	4.5		0.428571	0.8	0.166667	1.09762		1.392	0.082	0.198	0.272	1.513	1.218	1.218	1.502		8.53	5.07	4.15667	8.2325	8.29333	8.965	10.05	12.7033		18.8443			5	Control IgG	0.000302912	0.825022	8.17519e-05
					C57BL/6J	Y6	PSNL	Control IgG	15	18	16	33.5		6	4	3	8.5		0.428571	0.636364	0.684211	1.19275		1.513	0.334	0.301	1.218	1.502	1.086	1.218	1.241		8.48333	5.04333	5.6625	8.78	7.41	10.9433	11.14	10.9467		20.4301			1	Control IgG	0.000201351	0.548407	1.88962e-05
					C57BL/6J	Y10	PSNL	Control IgG	26	14	15	34.5		2	1	0	2		0.857143	0.866667	1	1.79524		1.513	0.223	0.132	0.864	1.241	0.966	1.086	1.137		12.3767	4.24	5.37333	8.79333	9.29333	10.885	12.0933	10.9		6			2	Control IgG	0.000232828	0.634141	0.000168871
					C57BL/6J	Y13	PSNL	Control IgG	11	9	14	21.5		3	5	5	9		0.571429	0.285714	0.473684	0.808271		1.392	0.8	0.709	0.827	1.513	1.513	0.82	0.891		8.98333	8.77333	3.39667	10.3433	8.81667	9.045	8.25667	9.4		6			3	Control IgG	0.00057514	1.56647	0.000178514
					C57BL/6J	X3	PSNL	Anti-ICAM1	19	29	11	44		2	1	1	2.5		0.809524	0.933333	0.833333	1.75476		1.241	0.132	0.42	0.579	1.513	0.997	0.891	1.241		7.3175	5.89	5.87	5.45667	10.4433	9.85333	8.89	8.23667		3.80515			4	Control IgG	0.000566394	1.54265	0.000118933
					C57BL/6J	X6	PSNL	Anti-ICAM1	22	25	16	44		1	4	2	5.5		0.913043	0.724138	0.777778	1.56955		1.241	0.625	0.625	0.066	1.513	0.933	1.241	1.392		8.05333	7.42333	3.94	5.30667	6.93667	9.50333	8.6675	10.6633		14.3053			5	Control IgG	0.000267381	0.728249	3.44663e-05
					C57BL/6J	X10	PSNL	Anti-ICAM1	12	18	17	32.5		3	3	7	8		0.6	0.714286	0.416667	1.22262		1.392	0.82	0.334	0.82	1.513	1.502	1.218	1.241		8.79333	4.84667	6.37	7.83	7.47	7.76667	8.00667	9.06333		7.62091			6	Anti-ICAM1	0.000127944	0.348473	5.10279e-05
					C57BL/6J	Y4	PSNL	Anti-ICAM1	34	26	26	56		4	5	18	16		0.789474	0.677419	0.181818	1.16307		1.513	0.587	0.334	0.397	1.513	1.392	1.392	1.392		10.3725	5.32	9.43667	7.57333	8.32	10.9233	9.45	11.28		2.85388			7	Anti-ICAM1	0.000223476	0.608668	6.07699e-05
					C57BL/6J	Y7	PSNL	Anti-ICAM1	21	20	19	40		4	0	2	3		0.68	1	0.809524	1.74476		1.513	0.111	0.17	0.071	1.513	1.502	1.218	1.241		9.34	5.48667	5.72	6.9325	8.52	11.2667	10.8433	9.68667		7.11322			8	Anti-ICAM1	0.000193176	0.526141	2.24311e-05
					C57BL/6J	Y11	PSNL	Anti-ICAM1	13	9	9	20		4	2	5	6.5		0.529412	0.636364	0.285714	1.04393		1.513	0.579	0.587	0.701	1.513	1.502	0.891	1.502		6.7825	5.08333	4.3825	8.24667	11.72	9.62667	7.23667	10.2767		9.01376			9	Anti-ICAM1	0.000177016	0.482127	3.24136e-05
					C57BL/6J	Y12	PSNL	Anti-ICAM1	46	28	48	75		2	3	1	4.5		0.916667	0.806452	0.959184	1.74438		1.392	0.625	0.272	0.074	1.513	1.086	1.241	1.086		11.46	7.84333	6.13	9.56	13.4067	11.9833	11.155	10.61		12.7793			10	Anti-ICAM1	0.000148333	0.404005	2.92439e-05
																																													6	Anti-ICAM1	0.000188624	0.513743	5.55732e-05
							Control IgG	Average	14.8333	13.3333	11.8333	26.6667		3	2.83333	2.83333	5.75		0.630952	0.648124	0.598538	1.26287		1.47083	0.3705	0.357	0.847833	1.4205	1.23033	1.15867	1.234		8.87111	5.49097	4.87097	7.92875	8.39875	9.83333	9.51167	10.2811		11.5301			7	Anti-ICAM1	0.000217365	0.592024	7.32243e-05
								SD	6.94022	4.08248	5.03653	8.38252		2.19089	1.7224	2.04124	2.84165		0.240818	0.222402	0.273955	0.375462		0.0612125	0.253186	0.232459	0.324592	0.139105	0.233019	0.192344	0.211634		1.83249	1.66259	0.894361	1.86309	0.755119	1.03348	1.87792	1.56585		7.84983			8	Anti-ICAM1	0.000241147	0.656797	3.68251e-05
								N	6	6	6	6		6	6	6	6		6	6	6	6		6	6	6	6	6	6	6	6		6	6	6	6	6	6	6	6		6			9	Anti-ICAM1	0.000193707	0.527589	7.51452e-05
								SEM	2.83333	1.66667	2.05616	3.42215		0.894427	0.703167	0.833333	1.1601		0.0983134	0.0907953	0.111842	0.153282		0.0249899	0.103363	0.094901	0.132514	0.0567895	0.0951296	0.0785242	0.0863991		0.748113	0.67875	0.365121	0.760604	0.308276	0.421917	0.766659	0.639255		3.20468			10	Anti-ICAM1	0.000204038	0.555726	8.60644e-05
							Anti-ICAM1	Average	23.8571	22.1429	20.8571	44.5		2.85714	2.57143	5.14286	6.57143		0.748303	0.78457	0.609145	1.46329		1.40071	0.497	0.391714	0.386857	1.513	1.27343	1.156	1.29929		8.87417	5.98476	5.97845	7.27226	9.54524	10.1319	9.17845	9.97381		8.21307			Control IgG	Average	0.000367156	1	0.000101409
								SD	12.1577	7.05759	13.1837	17.4523		1.21499	1.71825	6.09449	4.57738		0.150278	0.13605	0.30704	0.310485		0.121788	0.268993	0.16508	0.322468	0	0.257626	0.190737	0.137821		1.66469	1.17832	1.7756	1.51989	2.38434	1.39428	1.4283	1.04937		4.24888				SD	0.000185018	0.503923	6.34762e-05
								N	7	7	7	7		7	7	7	7		7	7	7	7		7	7	7	7	7	7	7	7		7	7	7	7	7	7	7	7		7				N	10	10	10
								SEM	4.59518	2.66752	4.98296	6.59636		0.459221	0.649437	2.3035	1.73009		0.0567998	0.0514221	0.11605	0.117352		0.0460314	0.10167	0.0623946	0.121882	0	0.0973736	0.0720919	0.0520914		0.629193	0.445362	0.671112	0.574463	0.901195	0.526989	0.539846	0.396626		1.60592				SEM	5.8508e-05	0.159355	2.00729e-05
																																													Anti-ICAM1	Average	0.000191483	0.521529	5.22719e-05
																																														SD	3.40621e-05	0.0927728	2.17115e-05
																																														N	10	10	10
																																														SEM	1.07714e-05	0.0293373	6.86579e-06
[truncated: 5 more columns]

## Sheet: Figure5_Stats
Figure 5A
Session Responding
	Active
	Mixed Model Analysis
	Fixed Effects
	Type III Tests of Fixed Effectsa
	Source	Numerator df	Denominator df	F	Sig.
	Intercept	1	28.35	151.44	6.84065e-13
	Treatment	1	28.35	9.5665	0.00442051
	Session	2	21.2706	0.27979	0.758682
	Treatment * Session	2	21.2706	0.000853181	0.999147
	a. Dependent Variable: Active.
	Pairwise Comparisonsa
	(I) Treatment		Mean Difference (I-J)	Std. Error	df	Sig.c	95% Confidence Interval for Differencec
							Lower Bound	Upper Bound
	ControLIgG	AntiICAM1	-8.952*	2.89442	28.35	0.00442051	-14.878	-3.02672
	AntiICAM1	ControLIgG	8.952*	2.89442	28.35	0.00442051	3.02672	14.878
	Based on estimated marginal means
	*. The mean difference is significant at the .05 level.
	a. Dependent Variable: Active.
	c. Adjustment for multiple comparisons: Bonferroni.
Overall Responding
	Active
	2-Way ANOVA
	Tests of Between-Subjects Effects
	Dependent Variable:	AUC
	Source	Type III Sum of Squares	df	Mean Square	F	Sig.
	Corrected Model	6909.693a	3	2303.23	21.6088	9.36627e-07
	Intercept	11259.7	1	11259.7	105.638	7.31234e-10
	Abtreatment * Poke	467.5	1	467.5	4.38607	0.047971
	Abtreatment	562.154	1	562.154	5.27411	0.0315382
	Poke	5593.69	1	5593.69	52.4799	2.94262e-07
	Error	2344.92	22	106.587
	Total	20974	26
	Corrected Total	9254.62	25
	a. R Squared = .747 (Adjusted R Squared = .712)
	Pairwise Comparisons
	Dependent Variable:	AUC
	Poke			Mean Difference (I-J)	Std. Error	Sig.b	95% Confidence Interval for Differenceb
							Lower Bound	Upper Bound
	Inactive	Control	ICAM	-0.821429	5.74381	0.887583	-12.7334	11.0905
		ICAM	Control	0.821429	5.74381	0.887583	-11.0905	12.7334
	Active	Control	ICAM	-17.833*	5.74381	0.00516689	-29.7453	-5.9214
		ICAM	Control	17.833*	5.74381	0.00516689	5.9214	29.7453
	Based on estimated marginal means
	*. The mean difference is significant at the .05 level.
	b. Adjustment for multiple comparisons: Bonferroni.
Figure 5B
Heat
	Ipsilateral paw
	Mixed Model Analysis
	Fixed Effects
	Type III Tests of Fixed Effectsa
	Source	Numerator df	Denominator df	F	Sig.
	Intercept	1	17.8387	476.606	2.56379e-14
	AB	1	21.4947	0.133532	0.718369
	DAY	2	14.8203	6.46301	0.00959084
	AB * DAY	1	21.4947	2.04281	0.1673
	a. Dependent Variable: PTIpsi.
	Pairwise Comparisonsa
	(I) DAY		Mean Difference (I-J)	Std. Error	df	Sig.e	95% Confidence Interval for Differencee
							Lower Bound	Upper Bound
	3.00	6.00	.509b	0.757229	5.57294	1	-2.04981	3.06706
		18.00	-1.667b	0.794848	6.54157	0.230773	-4.2053	0.870957
	6.00	3.00	-.509c	0.757229	5.57294	1	-3.06706	2.04981
		18.00	-2.176*	0.617087	21.4947	0.00585876	-3.77788	-0.573706
	18.00	3.00	1.667c	0.794848	6.54157	0.230773	-0.870957	4.2053
		6.00	2.176*	0.617087	21.4947	0.00585876	0.573706	3.77788
	Based on estimated marginal means
	*. The mean difference is significant at the .05 level.
	a. Dependent Variable: PTIpsi.
	b. An estimate of the modified population marginal mean (I).
	c. An estimate of the modified population marginal mean (J).
	e. Adjustment for multiple comparisons: Bonferroni.
Mechanical
	Ipsilateral paw
	Mixed Model Analysis
	Fixed Effects
	Type III Tests of Fixed Effectsa
	Source	Numerator df	Denominator df	F	Sig.
	Intercept	1	14.8478	97.4686	6.48266e-08
	AB	1	18.2603	4.07553	0.058439
	DAY	2	13.7863	3.1292	0.0757716
	AB * DAY	1	18.2603	5.51127	0.0303524
	a. Dependent Variable: VFipsi.
	Pairwise Comparisonsa
	DAY			Mean Difference (I-J)	Std. Error	df	Sig.e	95% Confidence Interval for Differencee
								Lower Bound	Upper Bound
	3.00	Control	ICAM	.b
		ICAM	Control	.c
	6.00	Control	ICAM	-0.0347143	0.11047	11	0.759216	-0.277856	0.208428
		ICAM	Control	0.0347143	0.11047	11	0.759216	-0.208428	0.277856
	18.00	Control	ICAM	.461*	0.179943	11	0.0264341	0.0649245	0.857028
		ICAM	Control	-.461*	0.179943	11	0.0264341	-0.857028	-0.0649245
	Based on estimated marginal means
	*. The mean difference is significant at the .05 level.
	a. Dependent Variable: VFipsi.
	b. The level combination of factors in (I) is not observed.
	c. The level combination of factors in (J) is not observed.
	e. Adjustment for multiple comparisons: Bonferroni.
	Pairwise Comparisonsa
	AB			Mean Difference (I-J)	Std. Error	df	Sig.e	95% Confidence Interval for Differencee
								Lower Bound	Upper Bound
	Control	3.00	6.00	.b
			18.00	.b
		6.00	3.00	.c
			18.00	-.491*	0.154939	18.2603	0.00525409	-0.816017	-0.16565
		18.00	3.00	.c
			6.00	.491*	0.154939	18.2603	0.00525409	0.16565	0.816017
	ICAM	3.00	6.00	0.0837857	0.143162	5.48956	1	-0.402774	0.570345
			18.00	0.0886429	0.172648	9.45803	1	-0.41245	0.589736
		6.00	3.00	-0.0837857	0.143162	5.48956	1	-0.570345	0.402774
			18.00	0.00485714	0.143446	18.2603	1	-0.37317	0.382885
		18.00	3.00	-0.0886429	0.172648	9.45803	1	-0.589736	0.41245
			6.00	-0.00485714	0.143446	18.2603	1	-0.382885	0.37317
	Based on estimated marginal means
	*. The mean difference is significant at the .05 level.
	a. Dependent Variable: VFipsi.
	b. The level combination of factors in (I) is not observed.
	c. The level combination of factors in (J) is not observed.
	e. Adjustment for multiple comparisons: Bonferroni.
Figure 5D
	Independent Samples Test
			Levene's Test for Equality of Variances		t-test for Equality of Means
			F	Sig.	t	df	Sig. (2-tailed)	Mean Difference	Std. Error Difference	95% Confidence Interval of the Difference
										Lower	Upper
	CD2	Equal variances assumed	51.4553	1.11738e-06	2.95293	18	0.00851243	0.478471	0.162033	0.138053	0.818888
		Equal variances not assumed			2.95293	9.60938	0.015069	0.478471	0.162033	0.11544	0.841501
	CD4	Equal variances assumed	13.2749	0.00185846	2.31618	18	0.0325433	0.484544	0.209199	0.0450325	0.924055
		Equal variances not assumed			2.31618	11.0774	0.0406986	0.484544	0.209199	0.0244917	0.944596
	CD19	Equal variances assumed	19.9814	0.00208307	-2.63678	8	0.0298622	-11.8045	4.47686	-22.1282	-1.48084
		Equal variances not assumed			-2.63678	4.03352	0.0572834	-11.8045	4.47686	-24.1936	0.584632
