# Supplementary material for: Protective role of neuronal and lymphoid cannabinoid CB2 receptors in neuropathic pain
Source: eLife journal article supplement (doi:10.7554/elife.55582), 2020-07-20
Supplement: supp [file elife-55582-supp-v1.zip › elife_poa_e55582_Figure_5_source_data_1.xlsx]

## Sheet: Figure 5-figure supplement 1
BEHAVIOR
	SelfAdmin	Von Frey	Plantar	Plus Maze
	N	N	N	N
Control IgG	19	6	6	6
Anti-ICAM1	16	7	7	7
										Figure 5-figure supplement 1A																										Figure 5-figure supplement 1B
										Antibody Treatment
										Drug Selfadministration																										Food Selfadministration
										Active JWH133													Inactive JWH133													Active Food						Inactive Food
					Genotype	Mouse		Surgery	Treatment	day1	day2	day3	day4	day5	day6	day7	day8	day9	day10	day11	day12		day1	day2	day3	day4	day5	day6	day7	day8	day9	day10	day11	day12		day1	day2	day3	day4	day5		day1	day2	day3	day4	day5
					C57BL/6J	X1		PSNL	Control IgG	25	28	32	33	24	27	31	25	18	17	18	15		3	8	6	4	2	3	1	1	2	0	2	3		43	39	46	42	46		23	6	7	6	7
					C57BL/6J	X2		PSNL	Control IgG	16	18	7	10	17	28	18	21	6	15	12	4		4	5	0	2	13	3	11	6	4	5	4	1		26	45	57	49	41		14	4	1	9	6
					C57BL/6J	Y2		PSNL	Control IgG	25	24	20	15	7	11	17	5	12	5	9	7		1	4	1	1	2	1	1	6	3	2	1	5		40	50	64	65	44		10	5	7	9	2
					C57BL/6J	Y6		PSNL	Control IgG	33	16	24	26	25	17	25	18	19	15	18	16		0	0	1	2	2	4	6	5	3	6	4	3		49	50	47	54	45		11	5	8	5	0
					C57BL/6J	Y10		PSNL	Control IgG	19	30	23	7	32	29	27	20	27	26	14	15		3	3	2	2	1	2	4	0	3	2	1	0		29	58	69	63	43		15	6	7	10	3
					C57BL/6J	Y13		PSNL	Control IgG	28	24	15	17	15	9	11	9	15	11	9	14		3	4	2	4	1	2	2	2	3	3	5	5		55	56	67	70	41		19	6	4	16	6
					C57BL/6J	X3		PSNL	Anti-ICAM1	18	18	15	21	21	21	15	20	12	19	29	11		0	1	4	4	3	3	2	4	1	2	1	1		35	39	50	53	51		9	3	4	0	3
					C57BL/6J	X6		PSNL	Anti-ICAM1	13	18	6	17	17	18	18	19	21	22	25	16		1	3	2	3	6	1	8	4	1	1	4	2		47	38	24	22	32		21	8	4	6	6
					C57BL/6J	X10		PSNL	Anti-ICAM1	25	35	26	24	23	20	19	14	11	12	18	17		1	9	6	2	9	3	6	2	5	3	3	7		33	48	54	49	38		16	9	5	10	7
					C57BL/6J	Y4		PSNL	Anti-ICAM1	31	31	21	32	37	35	34	32	29	34	26	26		1	1	4	5	1	1	4	4	3	4	5	18		32	37	73	61	72		19	10	4	3	2
					C57BL/6J	Y7		PSNL	Anti-ICAM1	35	23	20	15	24	29	20	24	19	21	20	19		3	6	4	6	8	6	2	5	5	4	0	2		35	56	69	82	69		23	9	5	1	7
					C57BL/6J	Y11		PSNL	Anti-ICAM1	17	25	27	20	17	13	12	11	13	13	9	9		0	0	2	9	1	2	6	5	8	4	2	5		24	28	47	46	25		10	7	2	7	4
					C57BL/6J	Y12		PSNL	Anti-ICAM1	22	27	4	41	26	31	49	49	31	46	28	48		2	3	0	3	4	3	2	0	2	2	3	1		36	44	53	54	59		10	6	12	13	9
								Control IgG	Average	24.3333	23.3333	20.1667	18	20	20.1667	21.5	16.3333	16.1667	14.8333	13.3333	11.8333		2.33333	4	2	2.5	3.5	2.5	4.16667	3.33333	3	3	2.83333	2.83333		40.3333	49.6667	58.3333	57.1667	43.3333		15.3333	5.33333	5.66667	9.16667	4
									SD	6.121	5.46504	8.51861	9.8387	8.80909	8.99815	7.42294	7.68548	7.08284	6.94022	4.08248	5.03653		1.50555	2.60768	2.09762	1.22474	4.67974	1.04881	3.86868	2.65832	0.632456	2.19089	1.7224	2.04124		11.2368	7.00476	10.0333	10.6474	2.06559		4.92612	0.816497	2.65832	3.86868	2.75681
									N	6	6	6	6	6	6	6	6	6	6	6	6		6	6	6	6	6	6	6	6	6	6	6	6		6	6	6	6	6		6	6	6	6	6
									SEM	2.49889	2.23109	3.47771	4.01663	3.59629	3.67348	3.0304	3.13759	2.89156	2.83333	1.66667	2.05616		0.614636	1.06458	0.856349	0.5	1.9105	0.428174	1.57938	1.08525	0.258199	0.894427	0.703167	0.833333		4.58742	2.85968	4.09607	4.34677	0.843274		2.01108	0.333333	1.08525	1.57938	1.12546
								Anti-ICAM1	Average	23	25.2857	17	24.2857	23.5714	23.8571	23.8571	24.1429	19.4286	23.8571	22.1429	20.8571		1.14286	3.28571	3.14286	4.57143	4.57143	2.71429	4.28571	3.42857	3.57143	2.85714	2.57143	5.14286		34.5714	41.4286	52.8571	52.4286	49.4286		15.4286	7.42857	5.14286	5.71429	5.42857
									SD	7.89515	6.34335	9.12871	9.19627	6.82781	7.92525	13.0822	12.9026	8.12111	12.1577	7.05759	13.1837		1.06904	3.1997	1.9518	2.37045	3.20713	1.70434	2.42997	1.81265	2.57275	1.21499	1.71825	6.09449		6.80336	8.94161	16.0357	17.9337	18.3381		5.79819	2.37045	3.18479	4.75094	2.50713
									N	7	7	7	7	7	7	7	7	7	7	7	7		7	7	7	7	7	7	7	7	7	7	7	7		7	7	7	7	7		7	7	7	7	7
									SEM	2.98408	2.39756	3.45033	3.47586	2.58067	2.99546	4.94459	4.87671	3.06949	4.59518	2.66752	4.98296		0.404061	1.20937	0.737711	0.895947	1.21218	0.644179	0.918443	0.685119	0.972408	0.459221	0.649437	2.3035		2.57143	3.37961	6.06092	6.77832	6.93115		2.19151	0.895947	1.20374	1.79569	0.947607

## Sheet: Figure5-figure suppl1_Stats
Figure5-figure supplement1A
	Mixed Model Analysis
	Fixed Effects
	Type III Tests of Fixed Effectsa
	Source	Numerator df	Denominator df	F	Sig.
	Intercept	1	115.965	842.726	5.0801e-55
	Abtreatment	1	115.965	9.18355	0.00301187
	Day	11	23.5194	1.49094	0.200257
	Abtreatment * Day	11	23.5194	0.792203	0.645987
	a. Dependent Variable: Active.
	Pairwise Comparisonsa
	(I) Abtreatment		Mean Difference (I-J)	Std. Error	df	Sig.c	95% Confidence Interval for Differencec
							Lower Bound	Upper Bound
	Control	ICAM	-4.274*	1.41029	115.965	0.00301187	-7.06708	-1.48053
	ICAM	Control	4.274*	1.41029	115.965	0.00301187	1.48053	7.06708
	Based on estimated marginal means
	*. The mean difference is significant at the .05 level.
	a. Dependent Variable: Dactive.
	c. Adjustment for multiple comparisons: Bonferroni.
