# Supplementary figures and images for: Protective role of neuronal and lymphoid cannabinoid CB2 receptors in neuropathic pain
Source: eLife journal article supplement (doi:10.7554/elife.55582), 2020-07-20

**A****JWH133 Self-administration**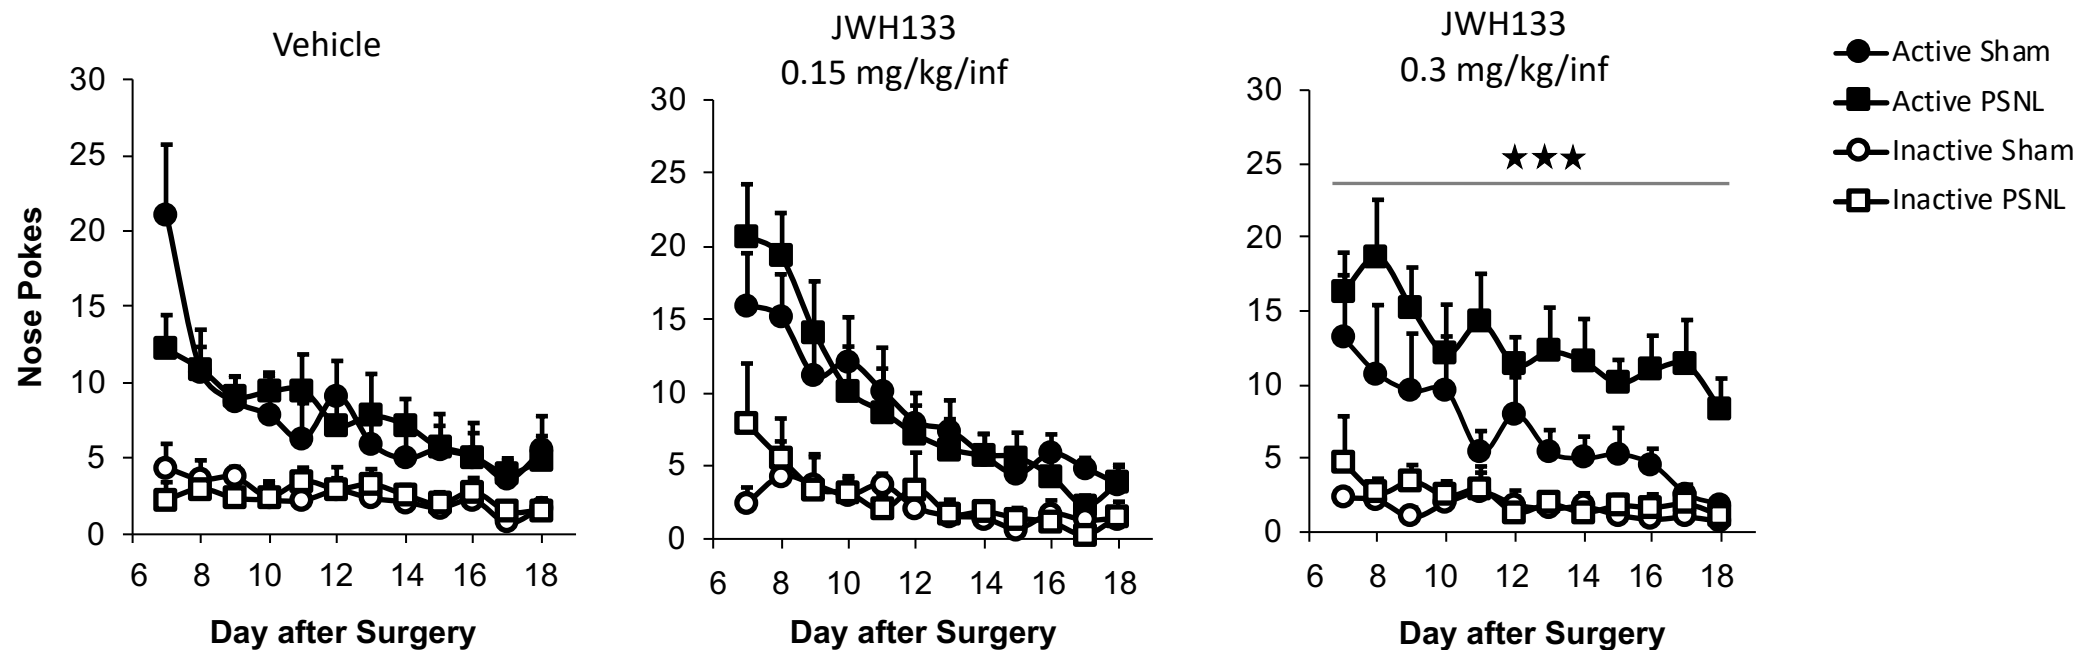**B****Operant Training for Food**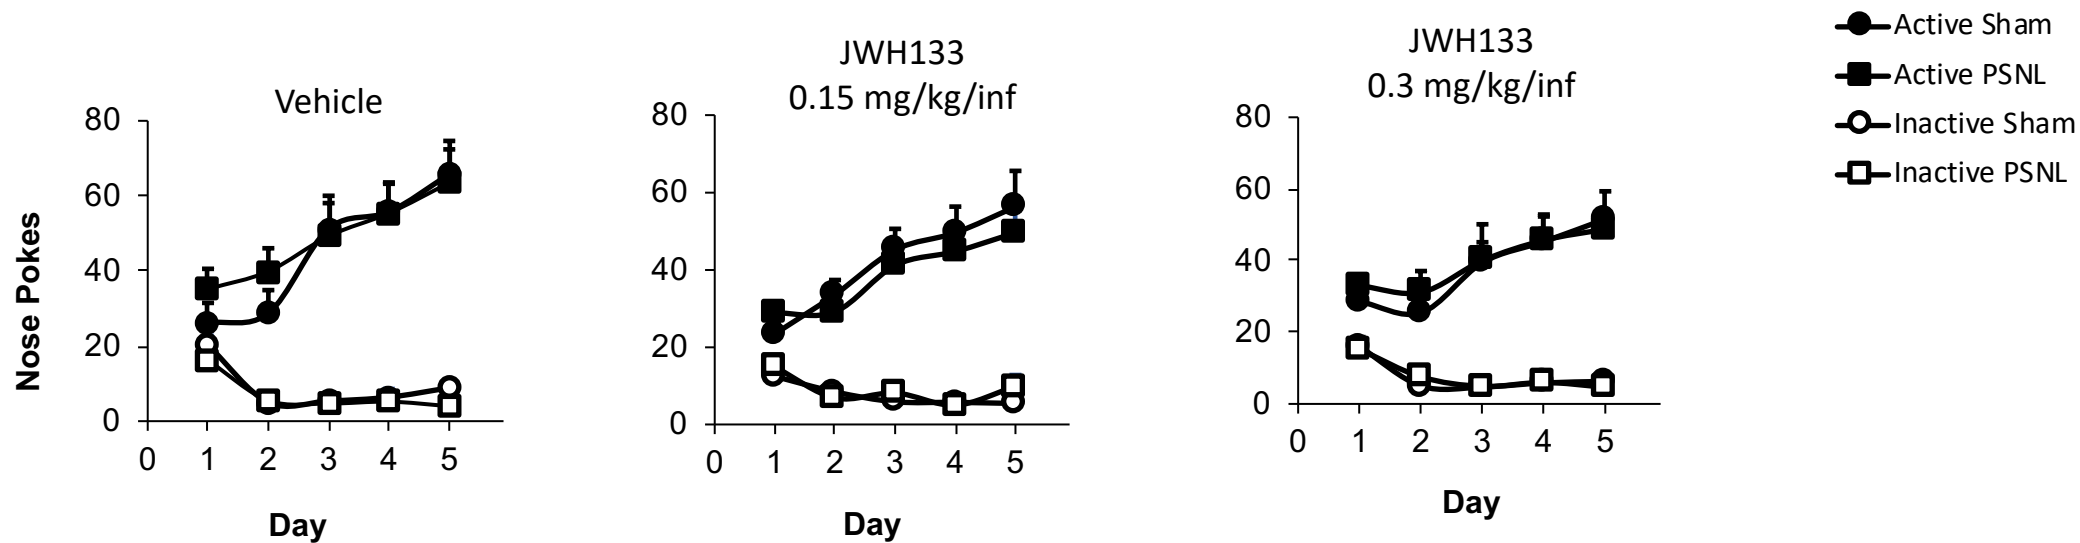

Supplement: supp [file elife-55582-supp-v1.zip › elife_poa_e55582_Figure_1_figure_supplement_1.pdf]

# Figure 2-figure supplement 1

## A JWH133 Self-administration

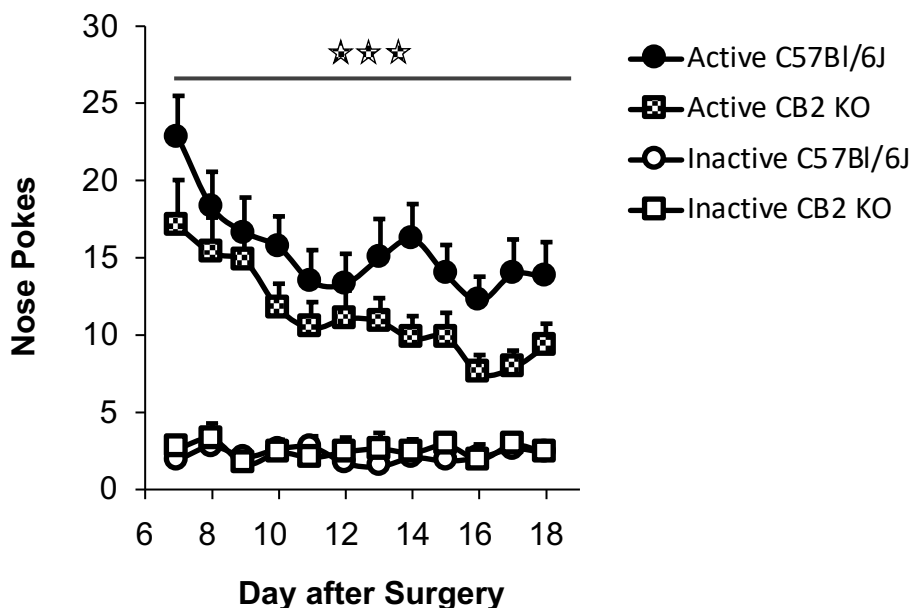

## B Operant Training for Food

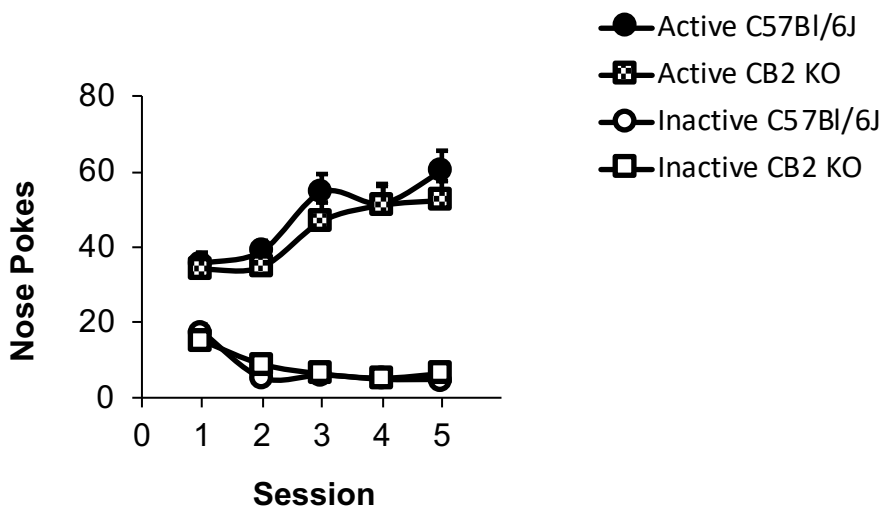

Supplement: supp [file elife-55582-supp-v1.zip › elife_poa_e55582_Figure_2_figure_supplement_1.pdf]

# Figure 3-figure supplement 1

**A**

## JWH133 Self-administration

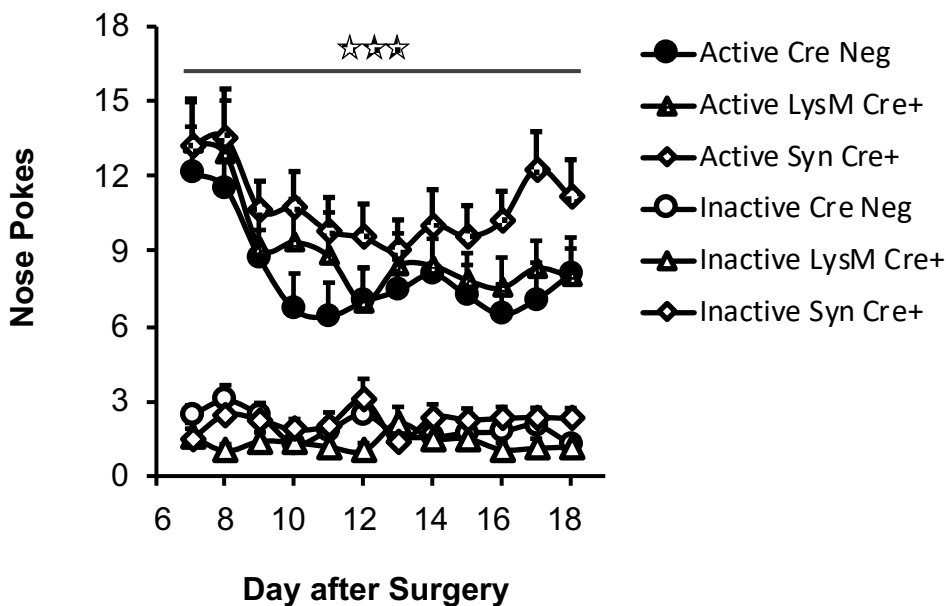

**B**

## Operant Training for Food

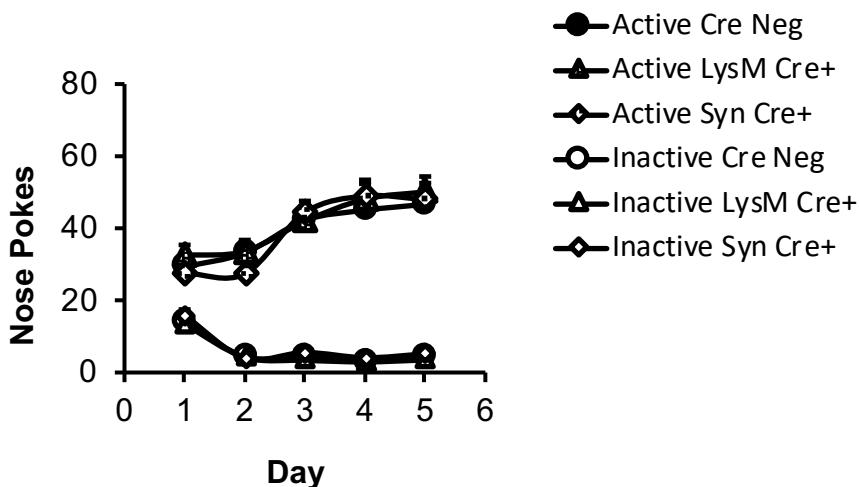

Supplement: supp [file elife-55582-supp-v1.zip › elife_poa_e55582_Figure_3_figure_supplement_1.pdf]

A

Von Frey - JWH133 5 - 10 mg/kg i.p.  
Ipsilateral paw

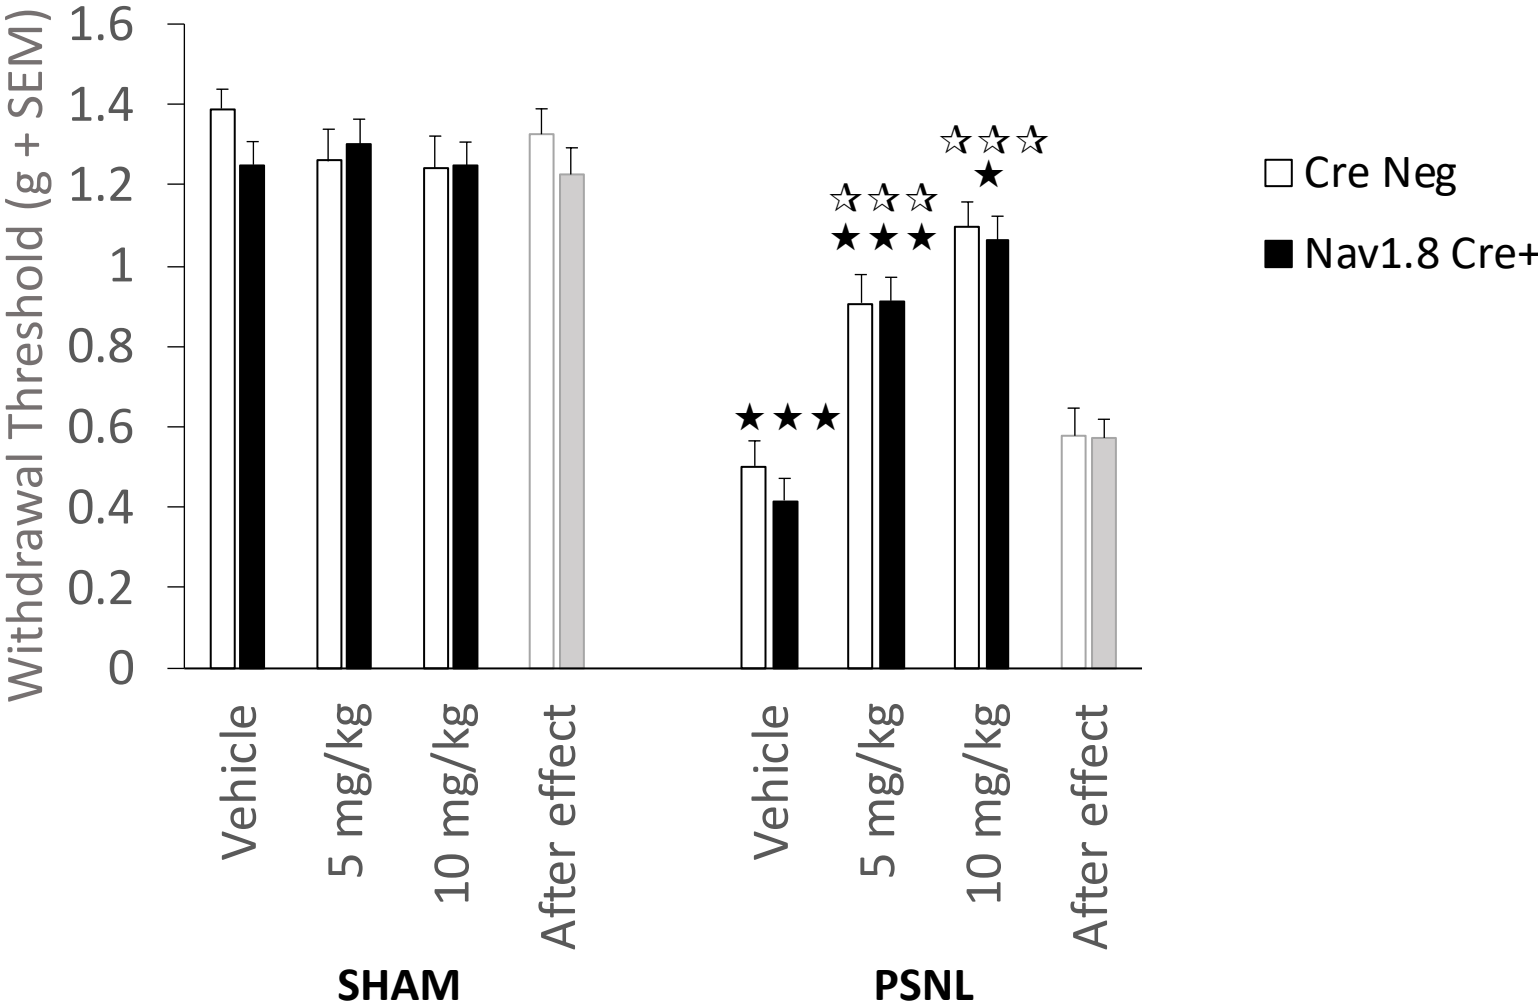

B

Plantar- JWH133 5 - 10 mg/kg i.p.  
Ipsilateral paw

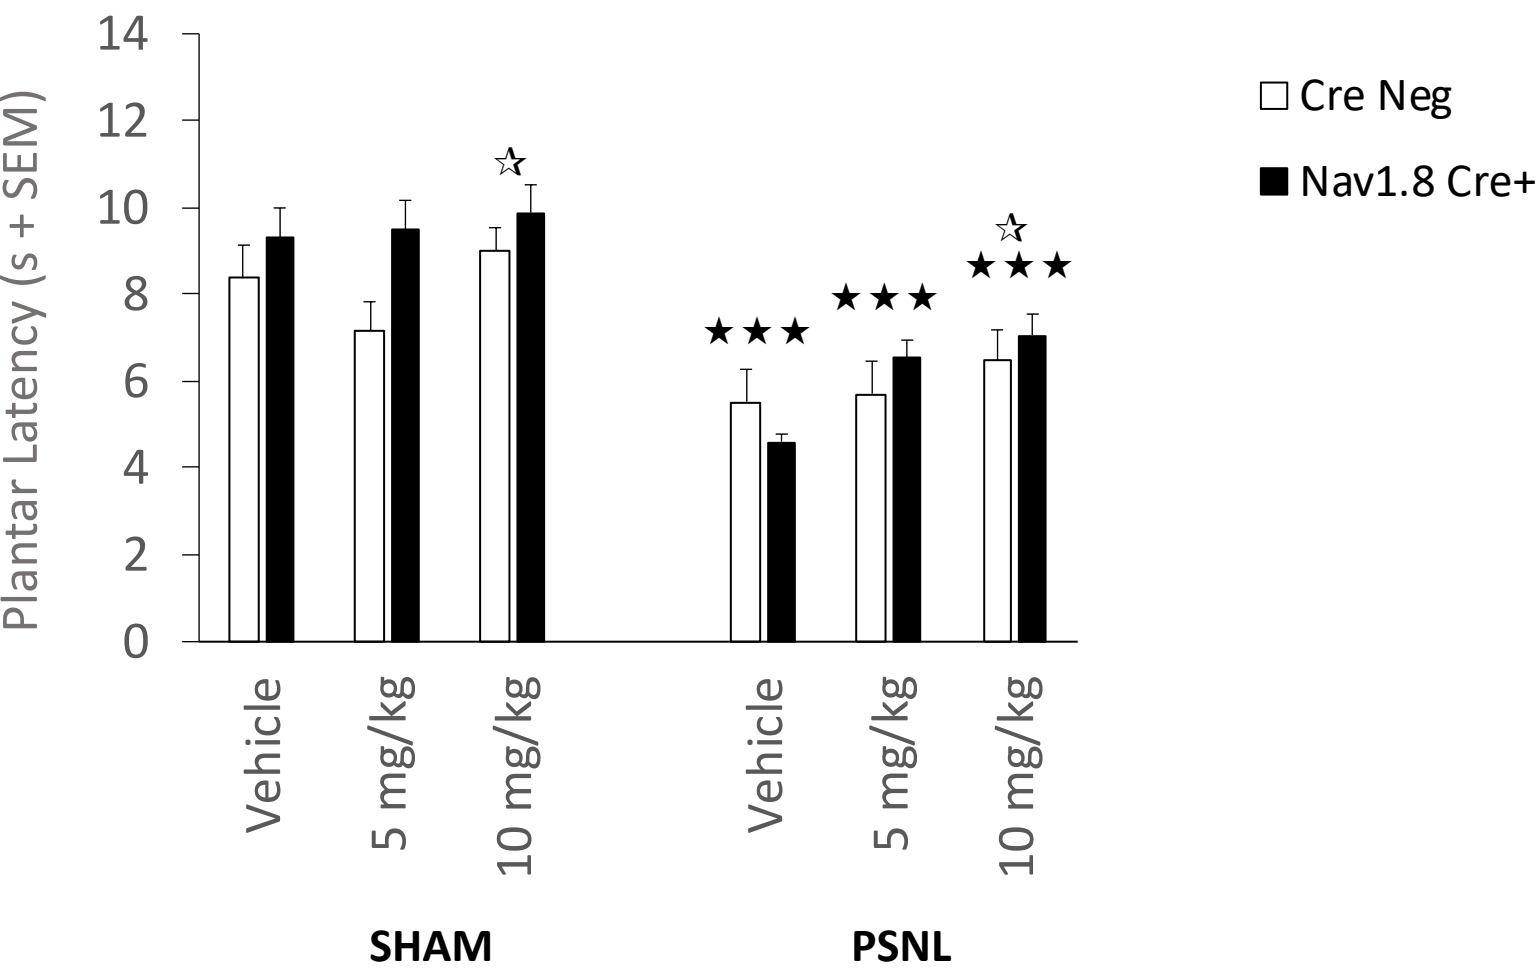

Supplement: supp [file elife-55582-supp-v1.zip › elife_poa_e55582_Figure_3_figure_supplement_2.pdf]

Figure 4-figure supplement 1

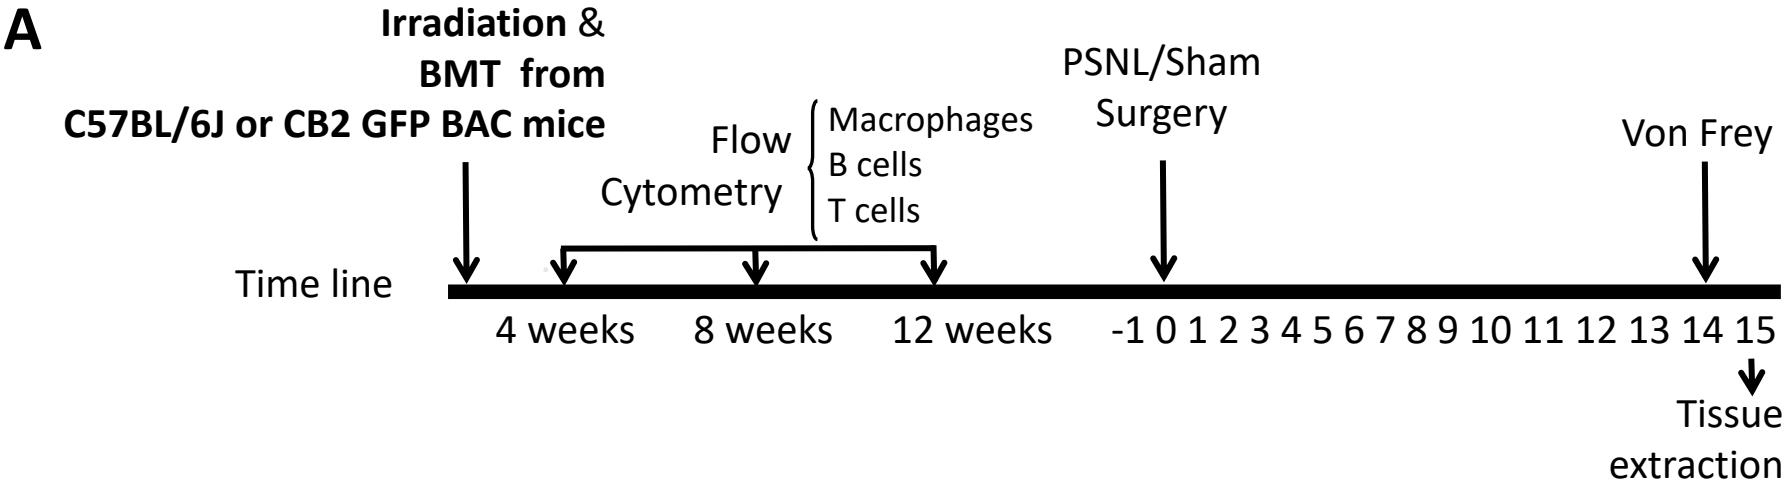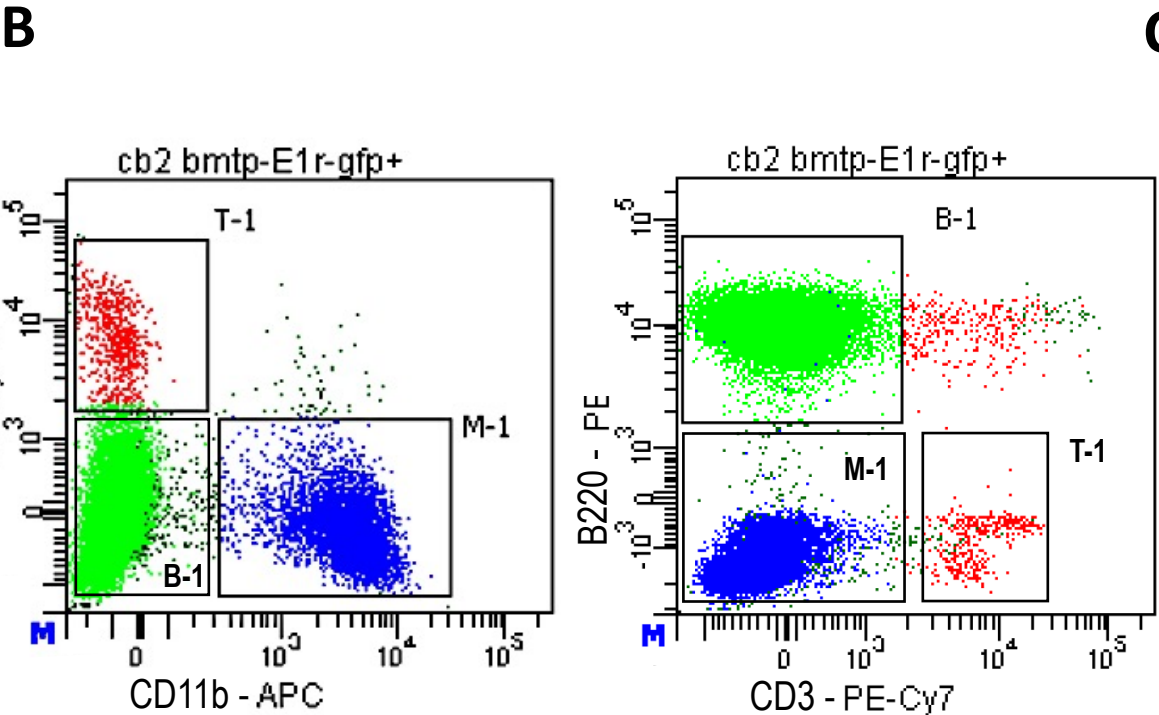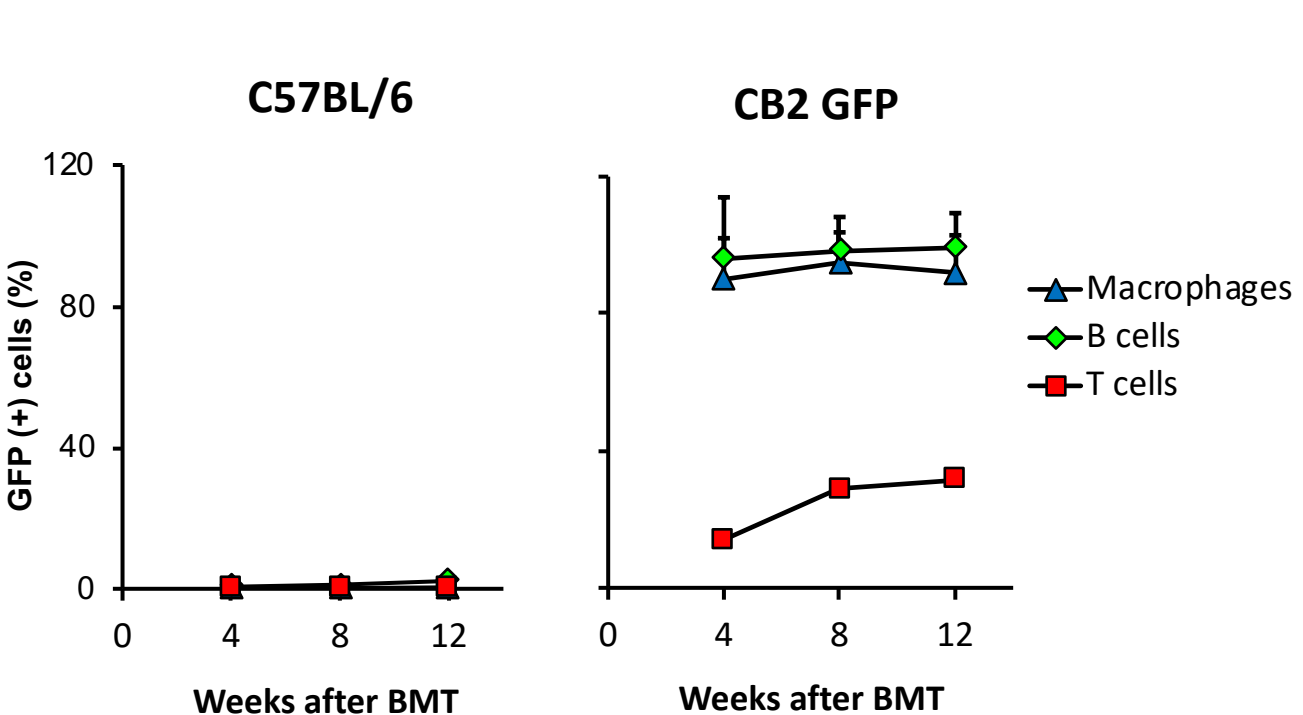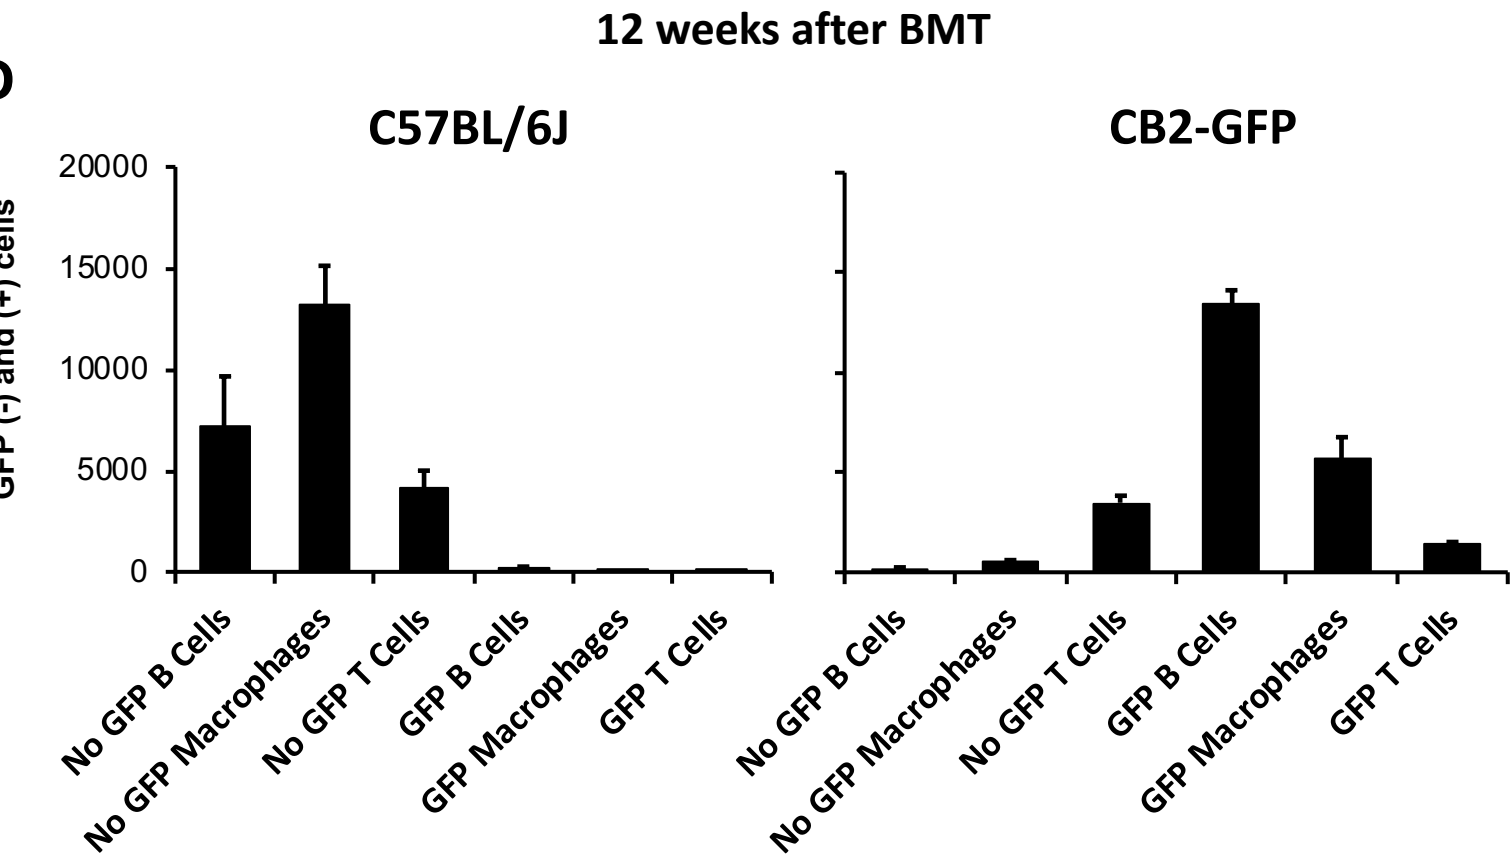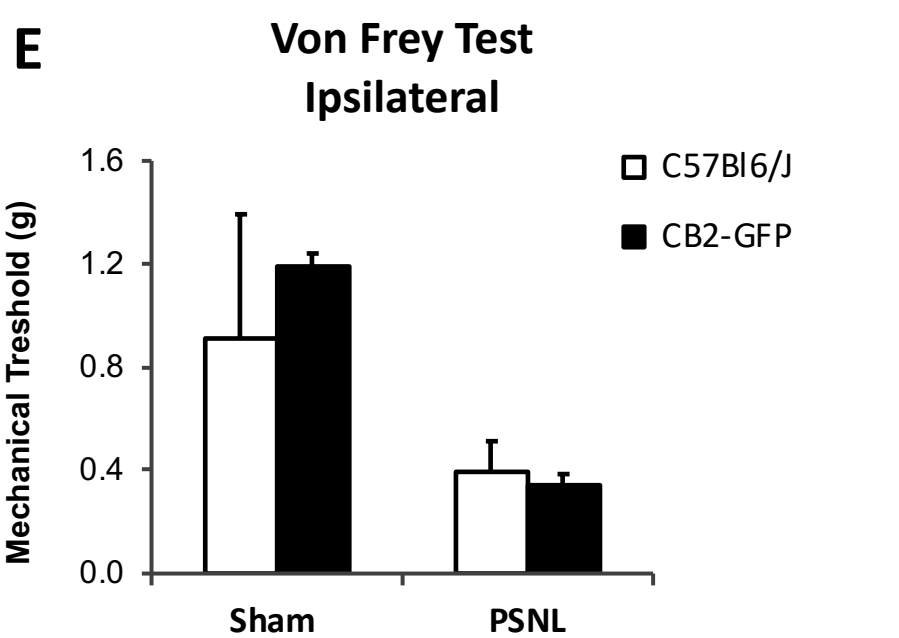

Supplement: supp [file elife-55582-supp-v1.zip › elife_poa_e55582_Figure_4_figure_supplement_1.pdf]

Non-neuronal CB2r-GFP+ cells in the Dorsal Root Ganglia

C57BL/6J SHAM

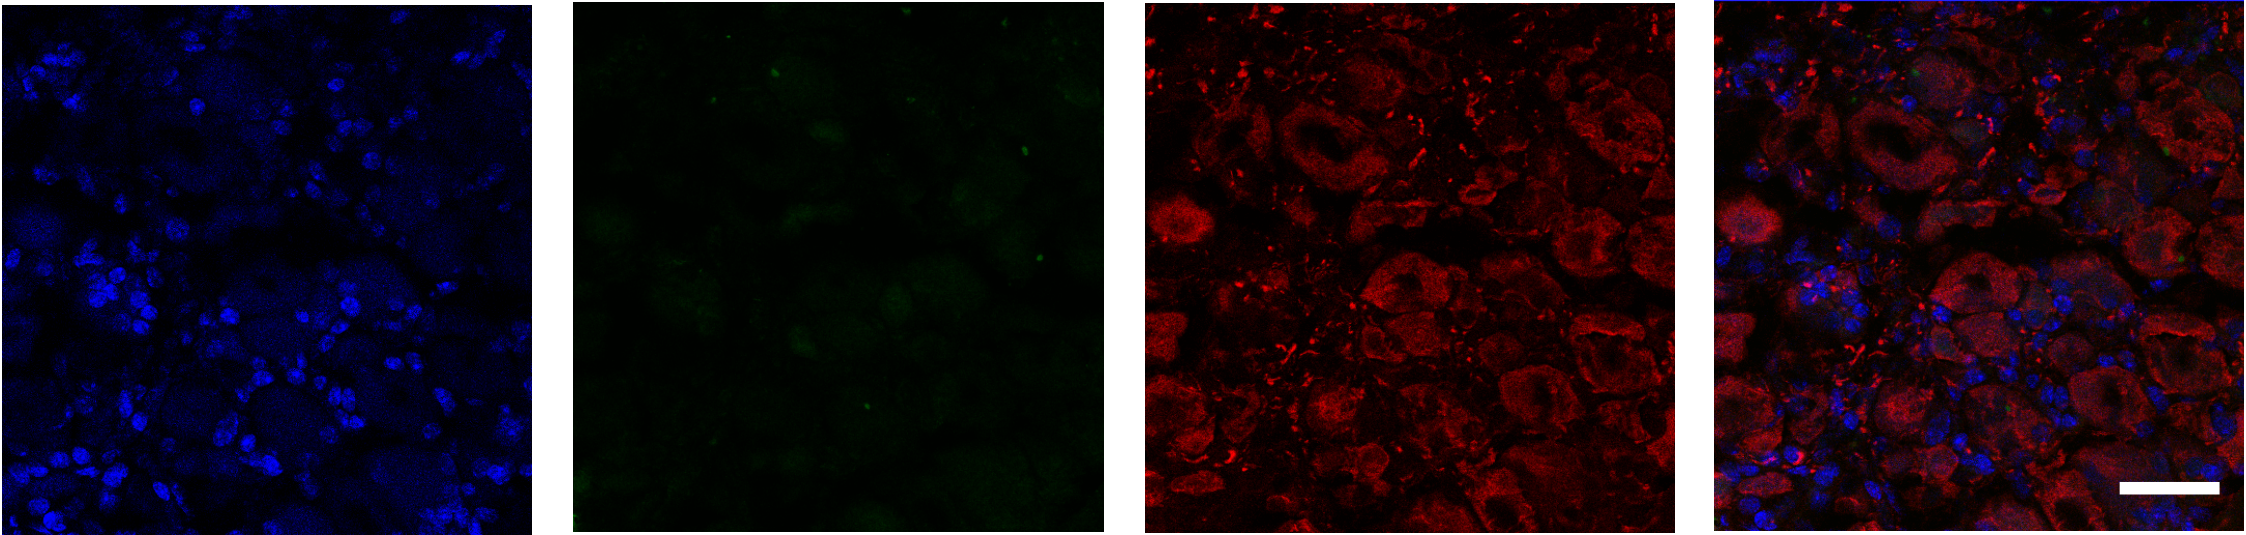

C57BL/6J PSNL

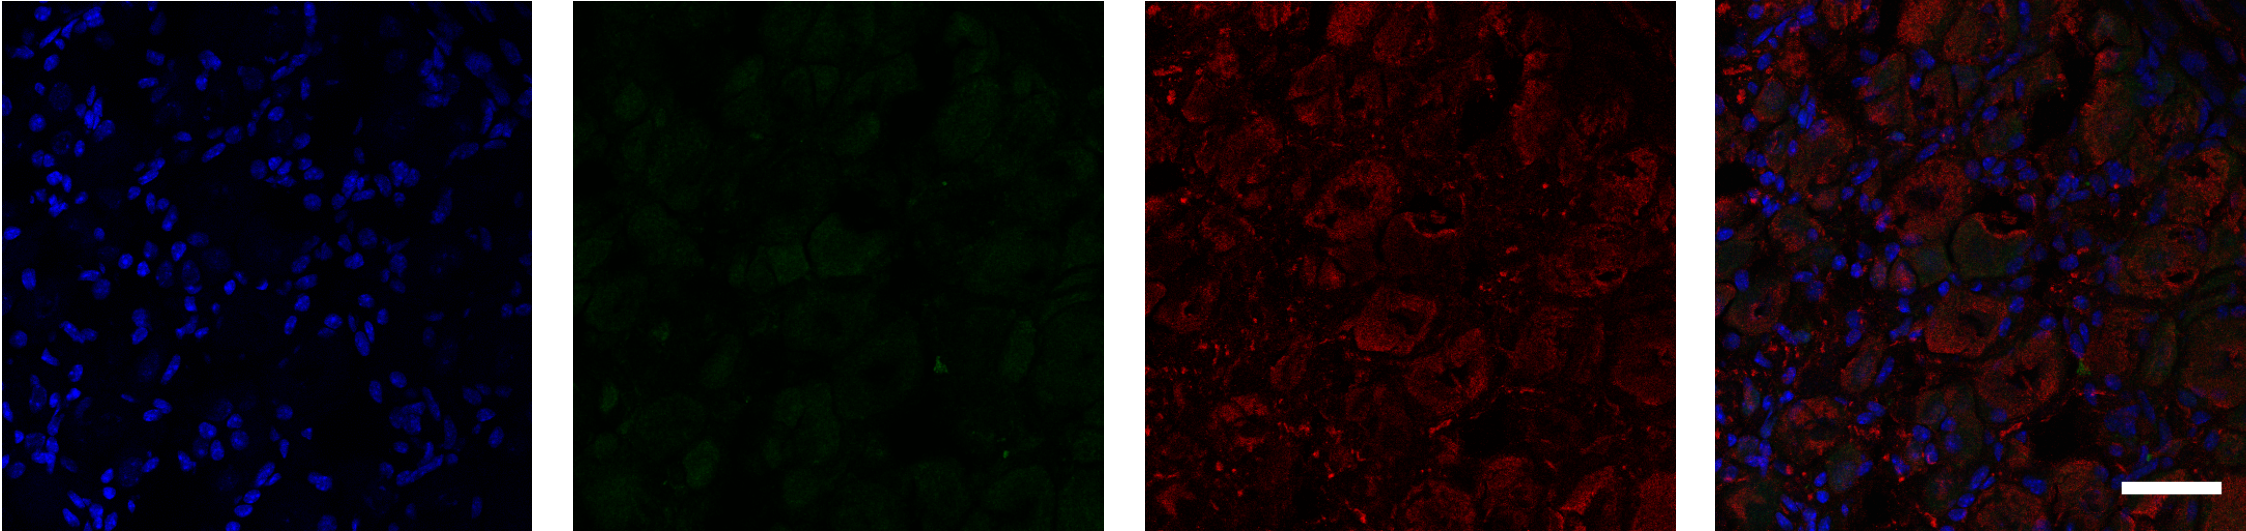

CB2-GFP SHAM

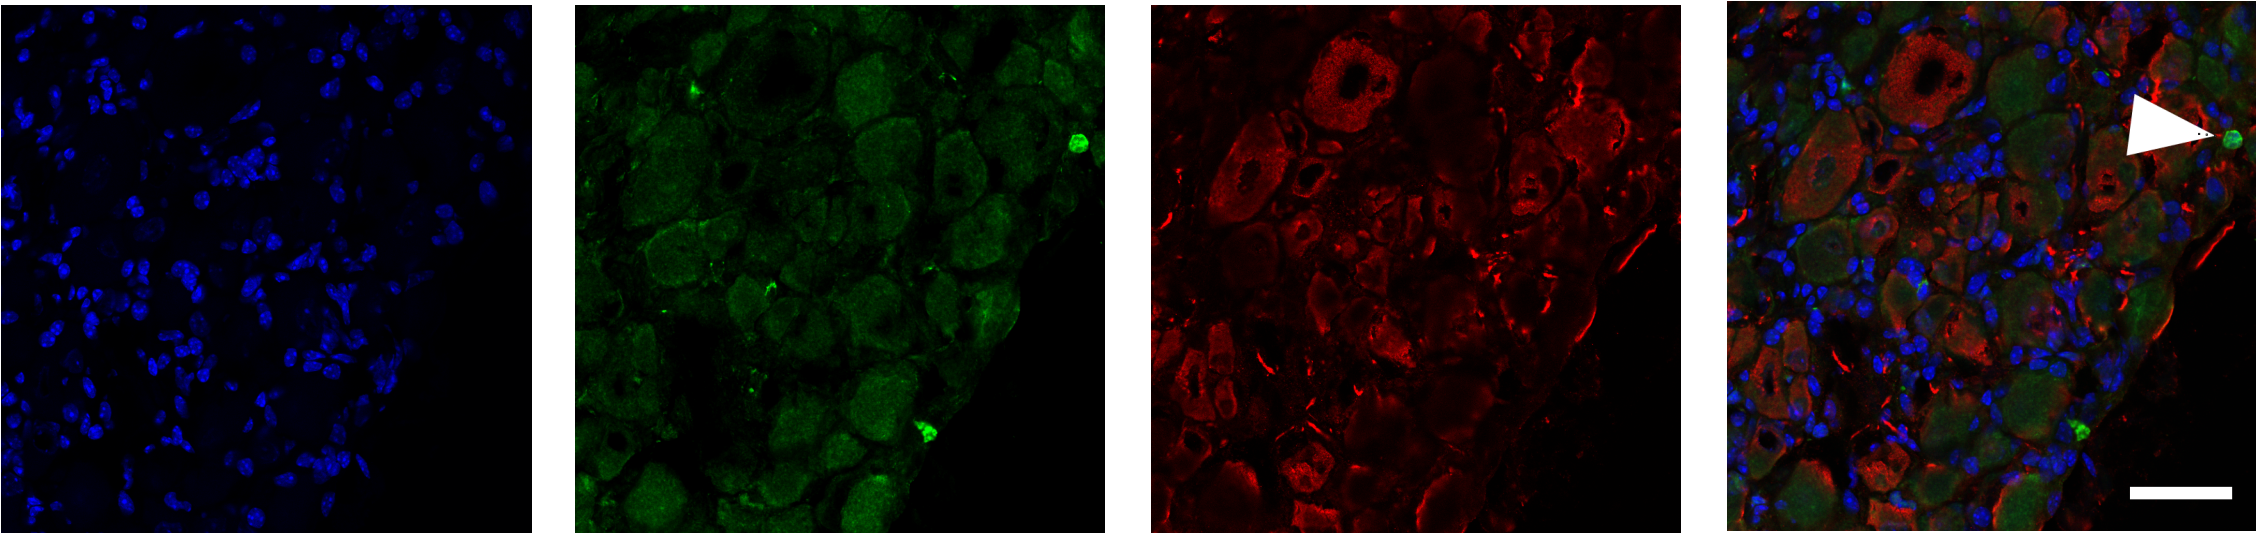

CB2-GFP PSNL

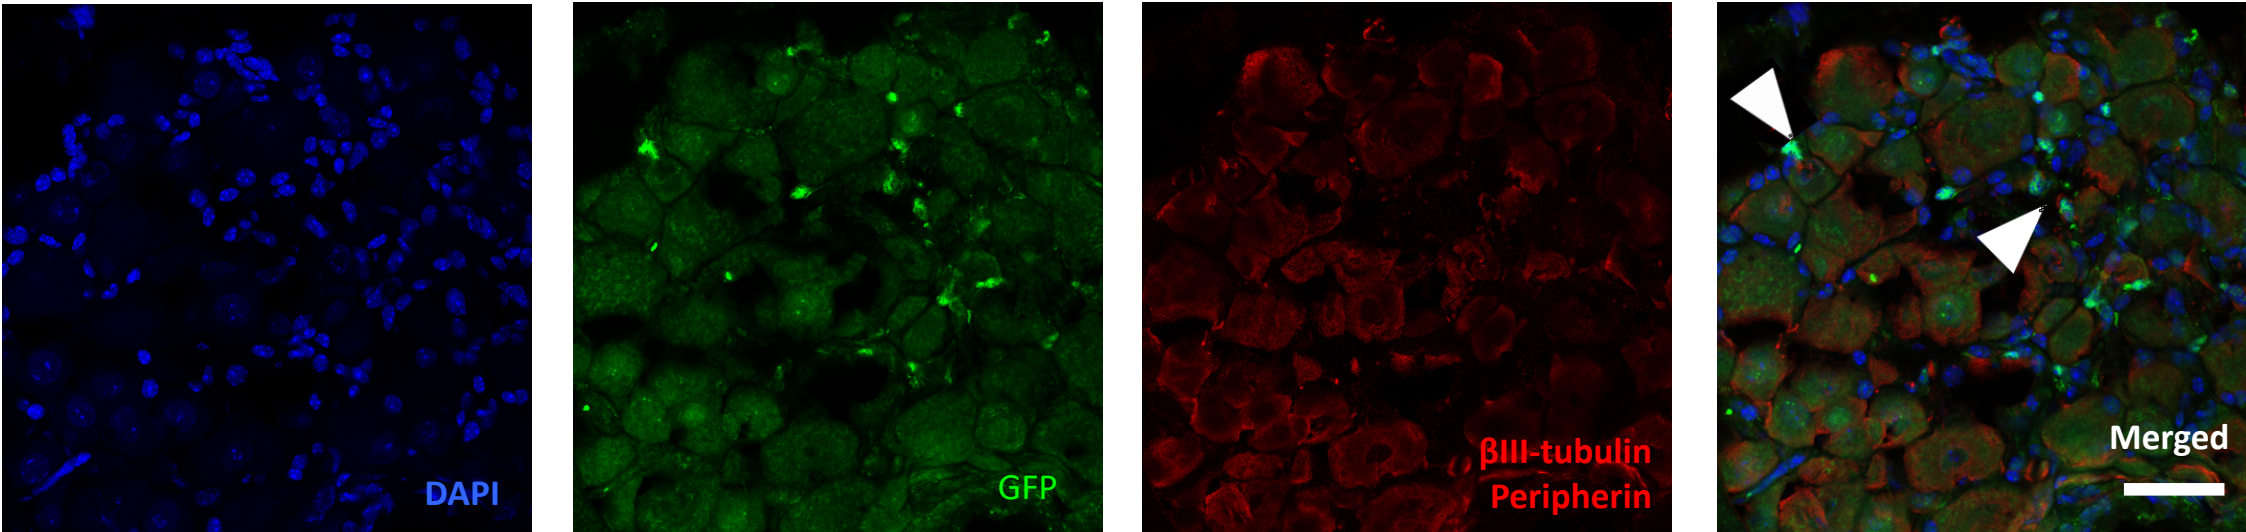

Supplement: supp [file elife-55582-supp-v1.zip › elife_poa_e55582_Figure_4_figure_supplement_2.pdf]

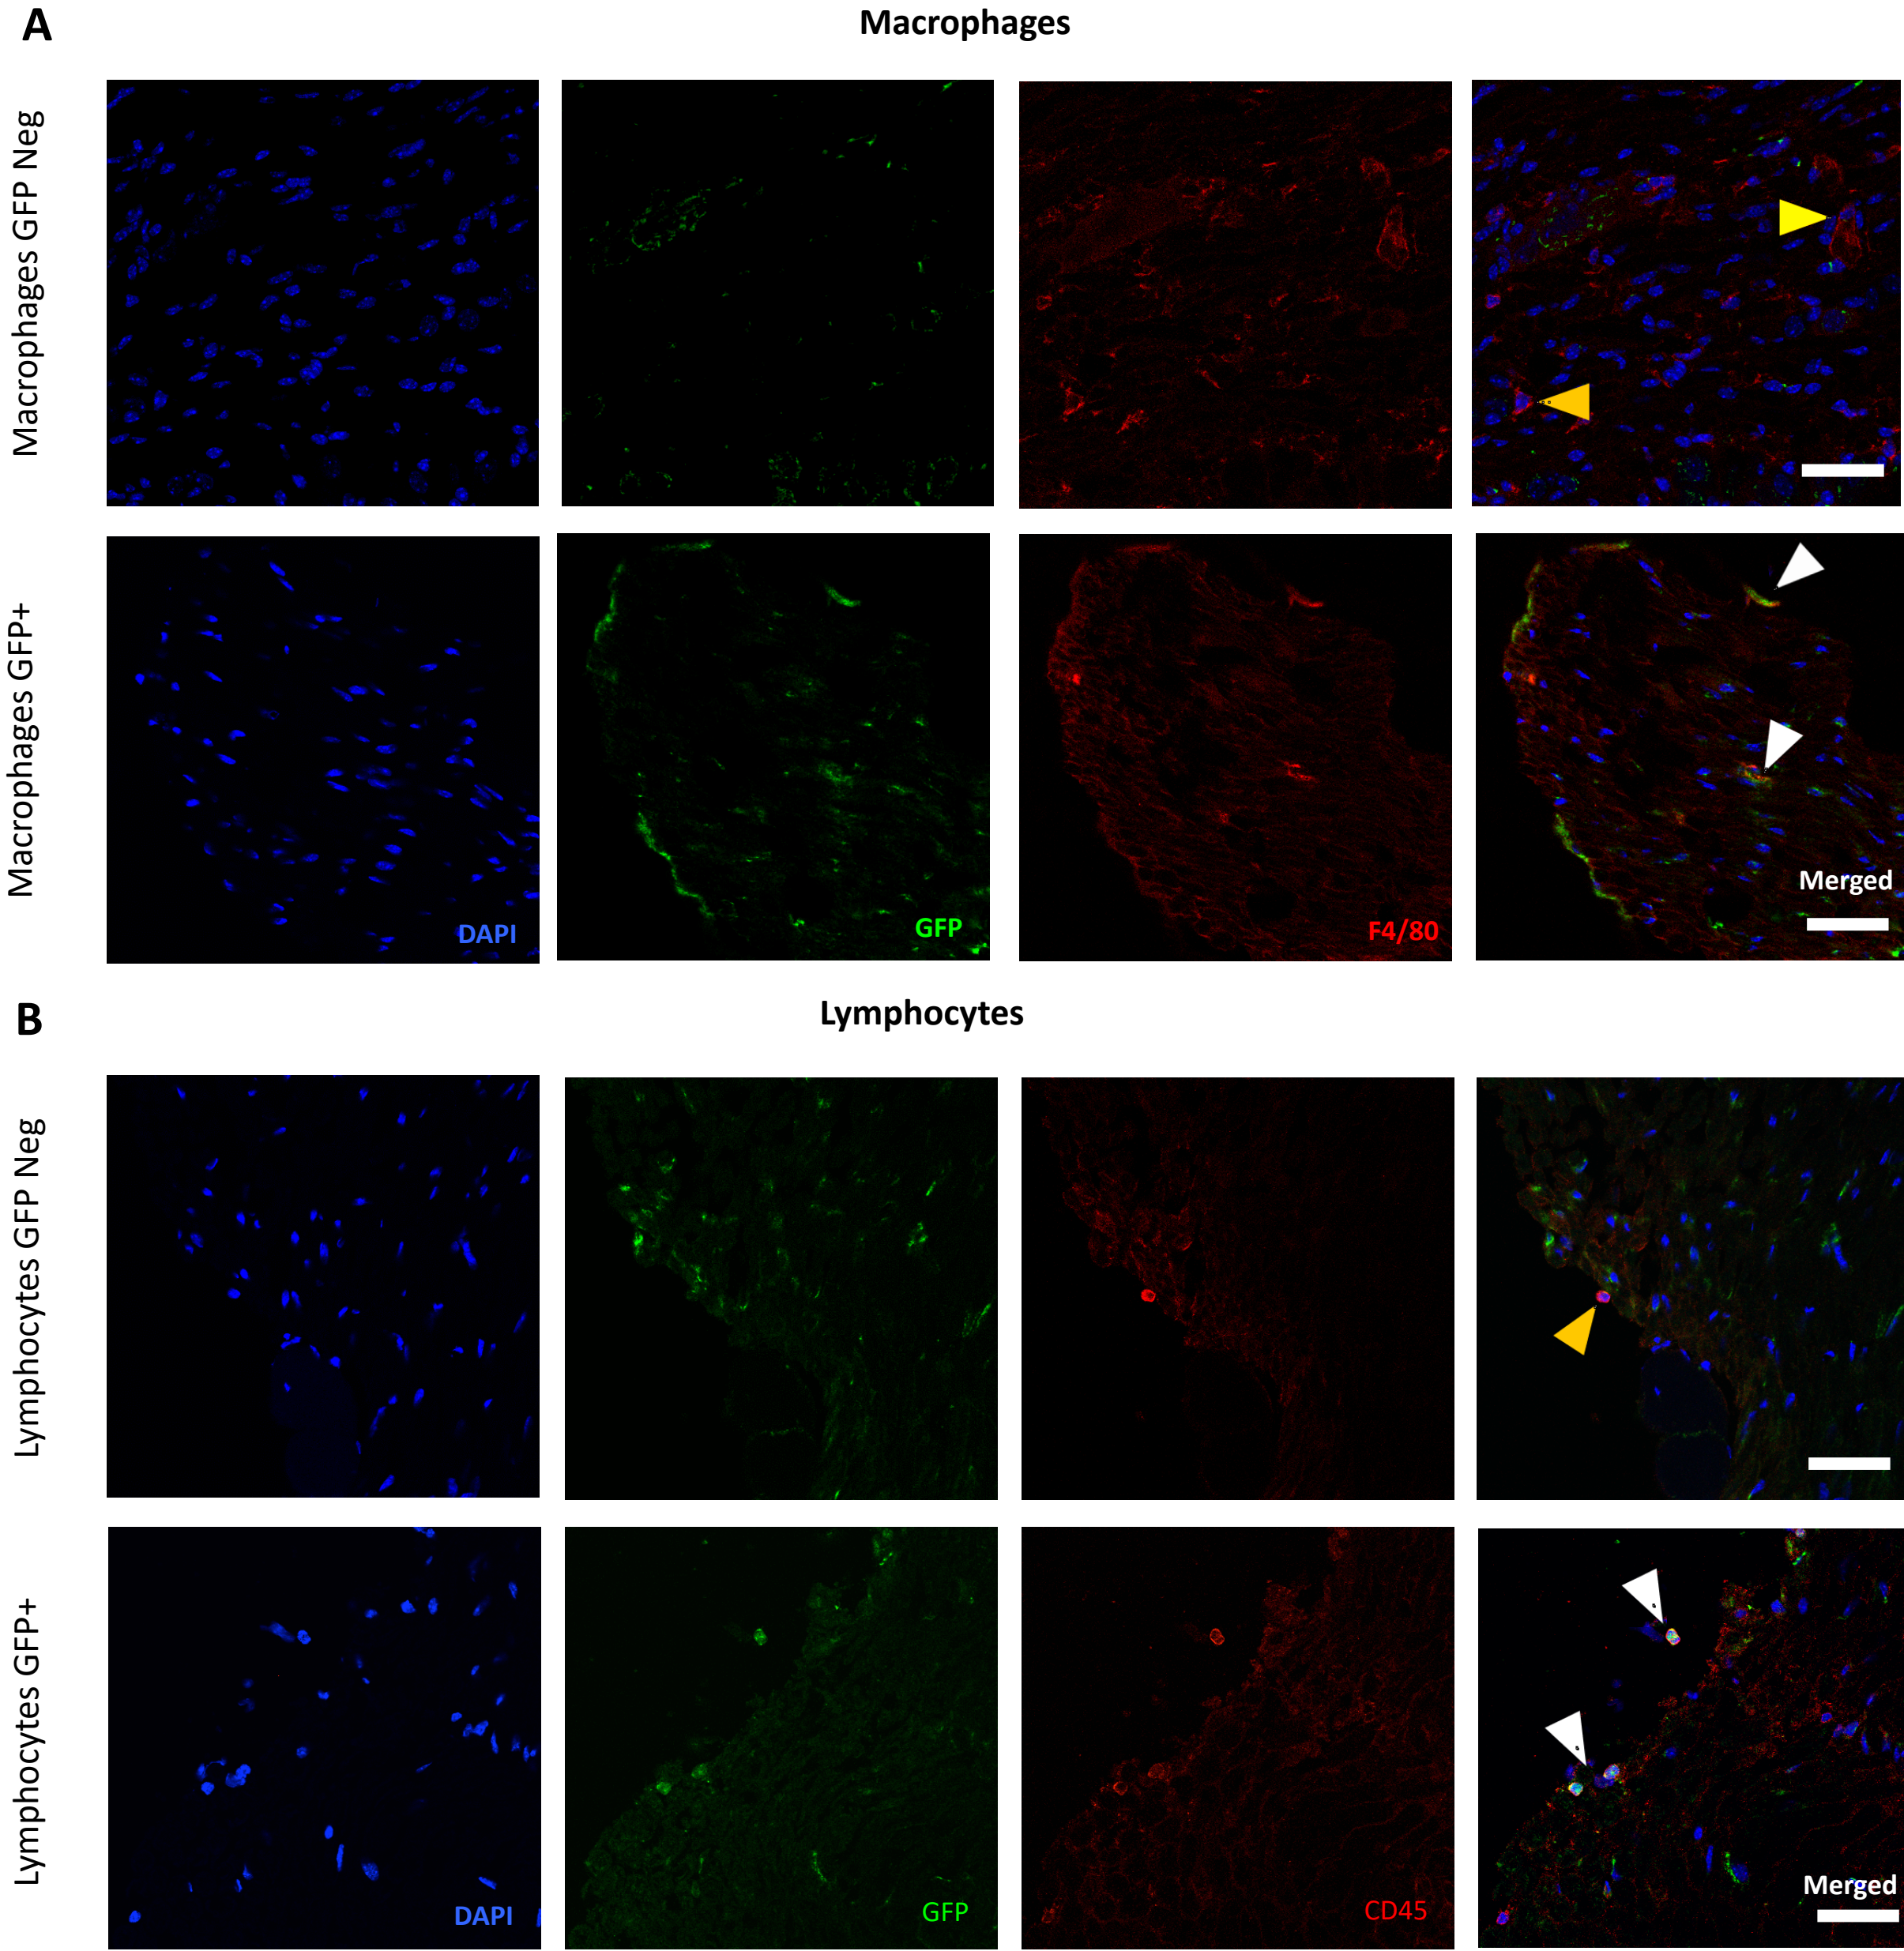

Supplement: supp [file elife-55582-supp-v1.zip › elife_poa_e55582_Figure_4_figure_supplement_3.pdf]

A

CB<sub>2</sub>-GFP in Dorsal Root Ganglia Neurons

CB<sub>2</sub>-GFP SHAM

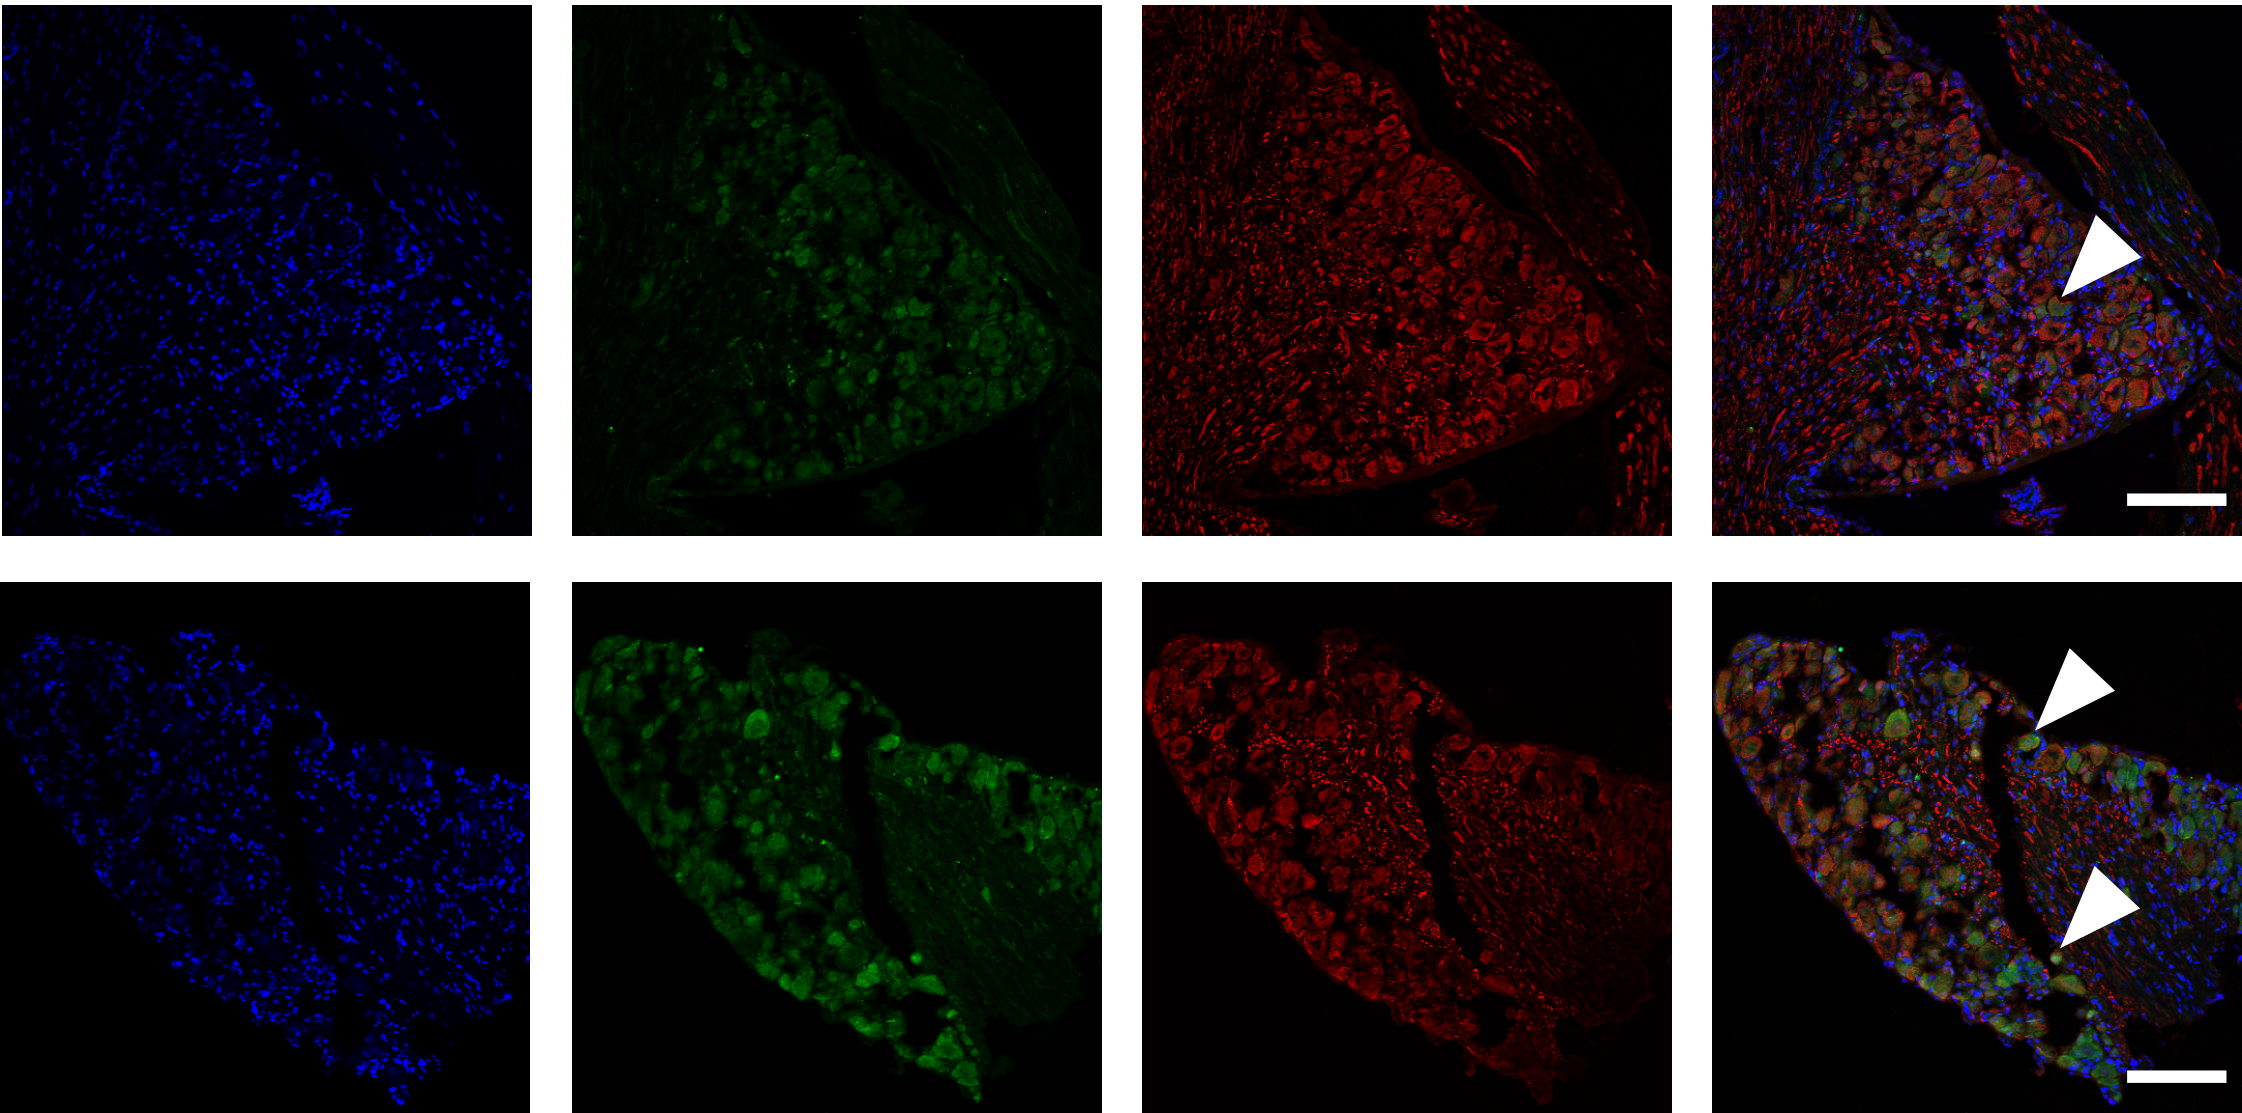

B

CB<sub>2</sub>-GFP PSNL

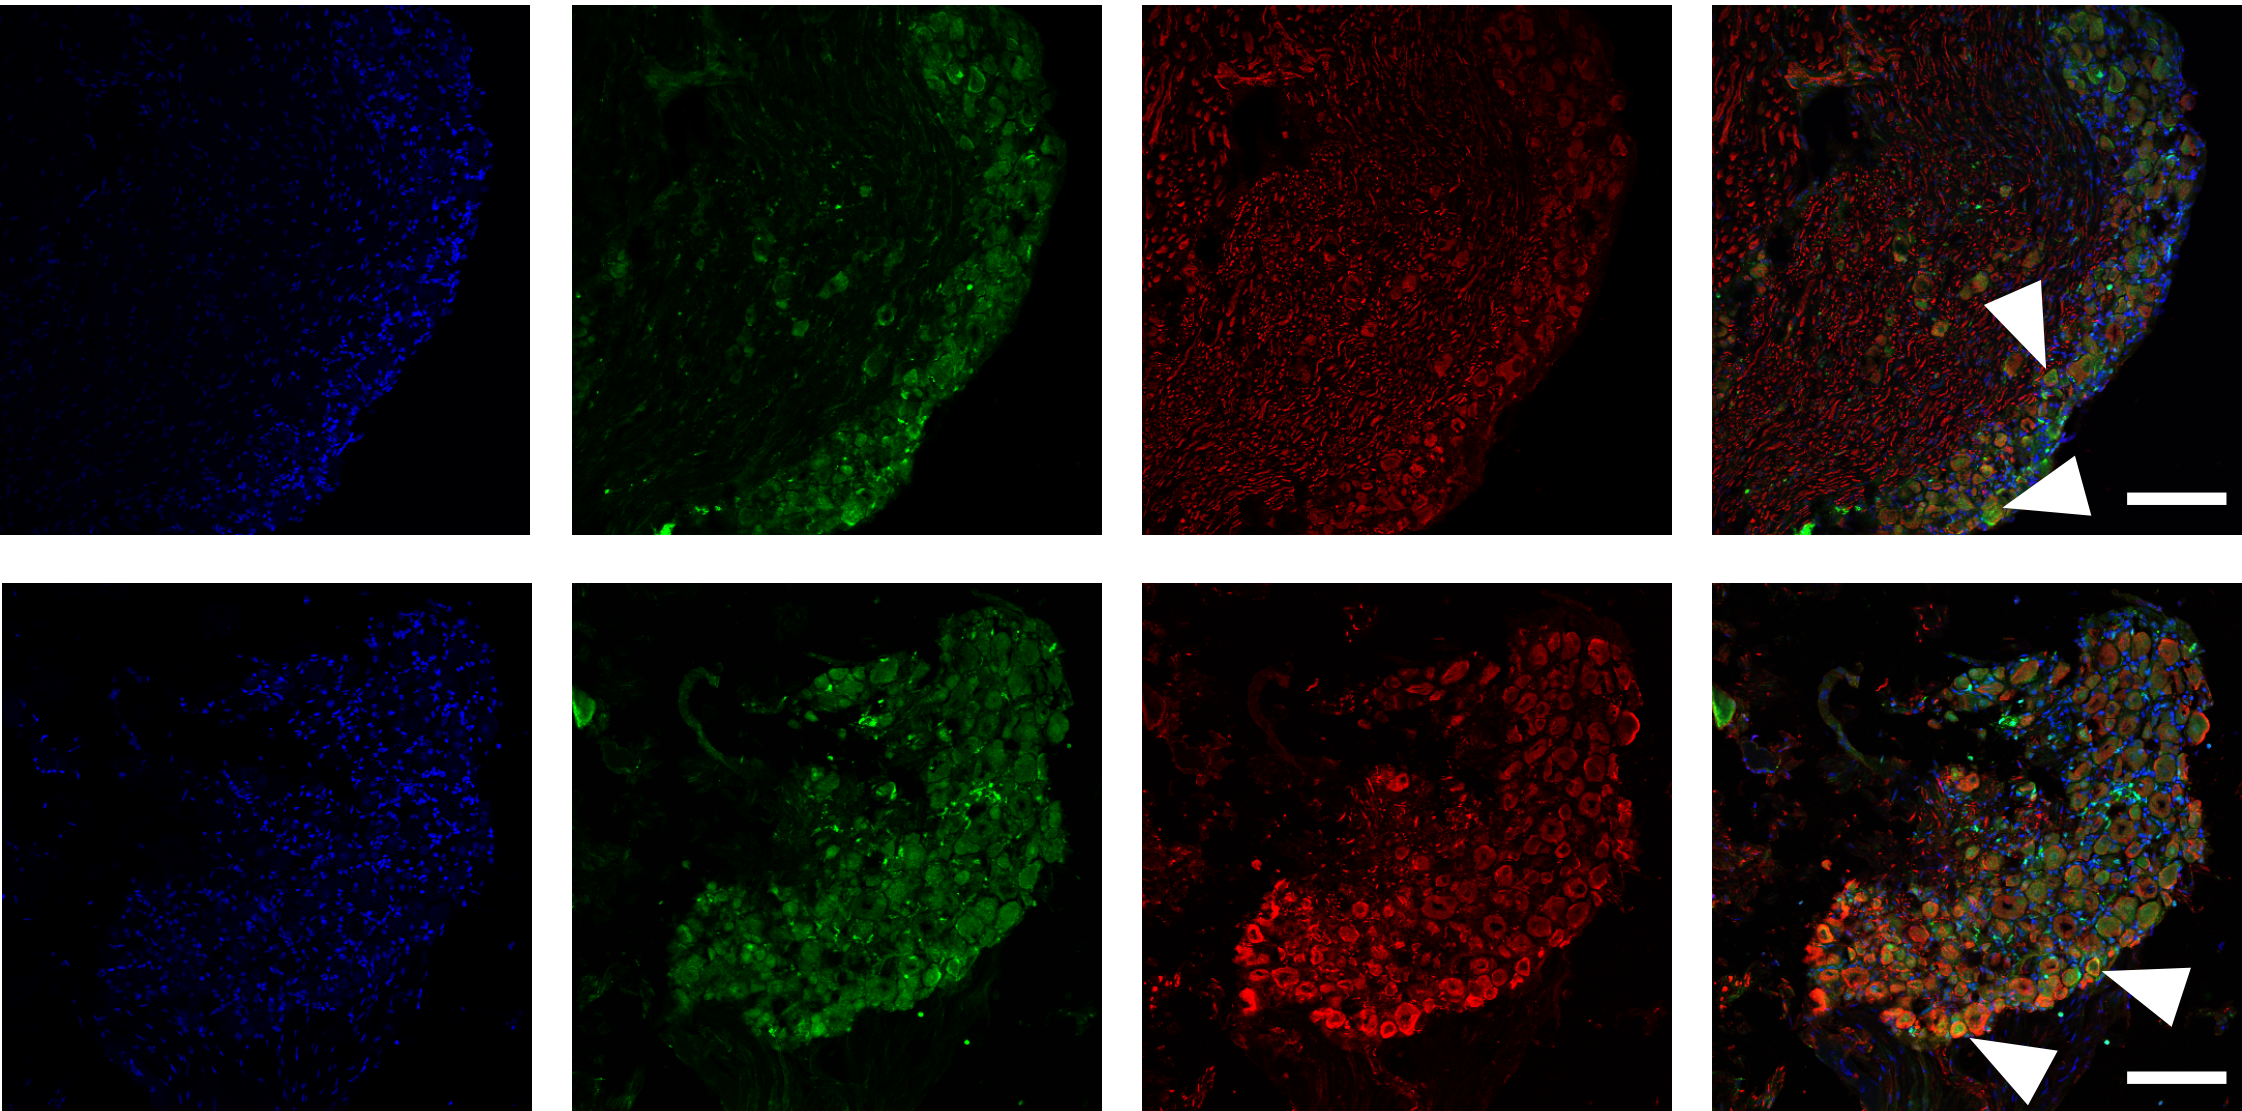

Supplement: supp [file elife-55582-supp-v1.zip › elife_poa_e55582_Figure_4_figure_supplement_5.pdf]

CB2r-GFP in Dorsal Root Ganglia Neurons

CB2-GFP SHAM

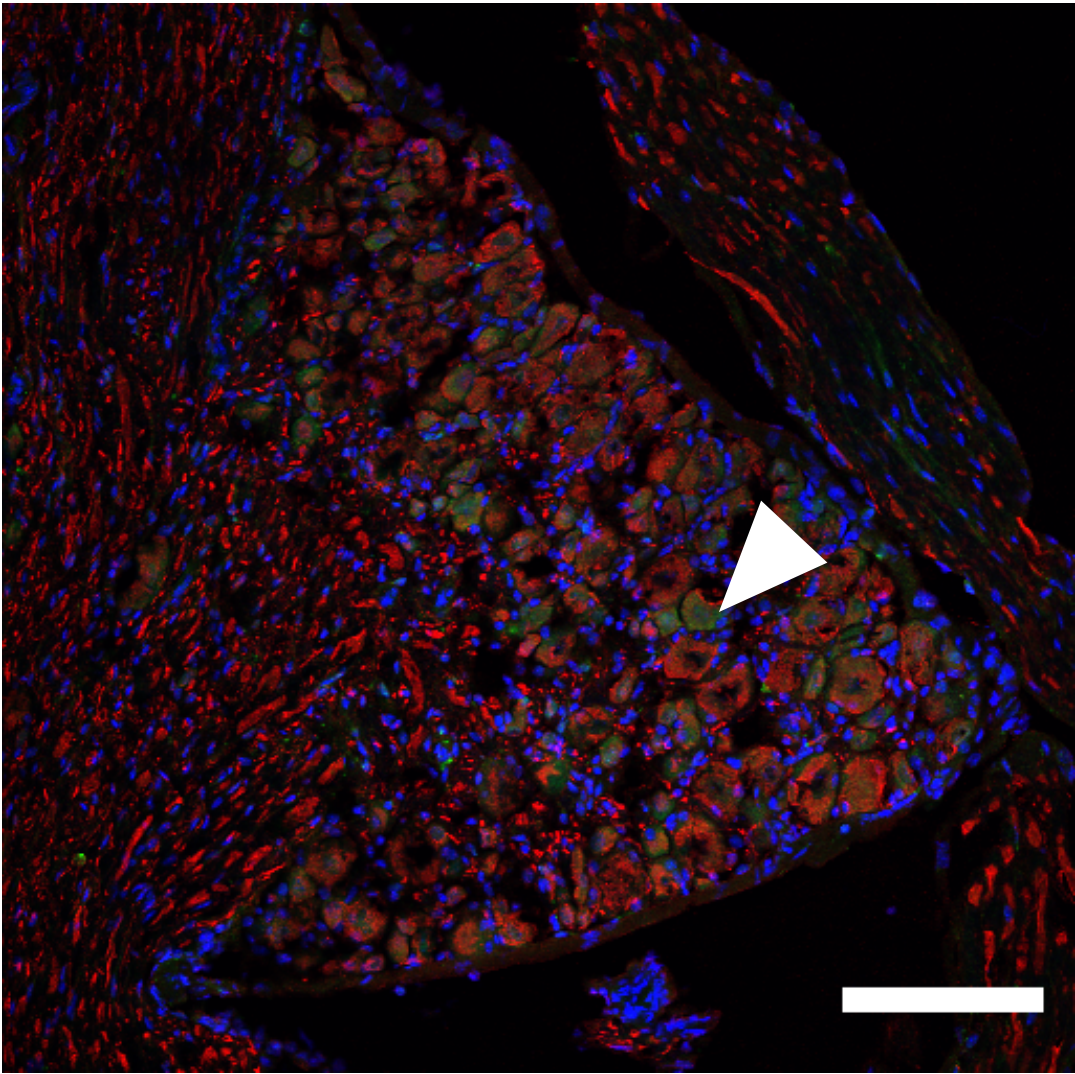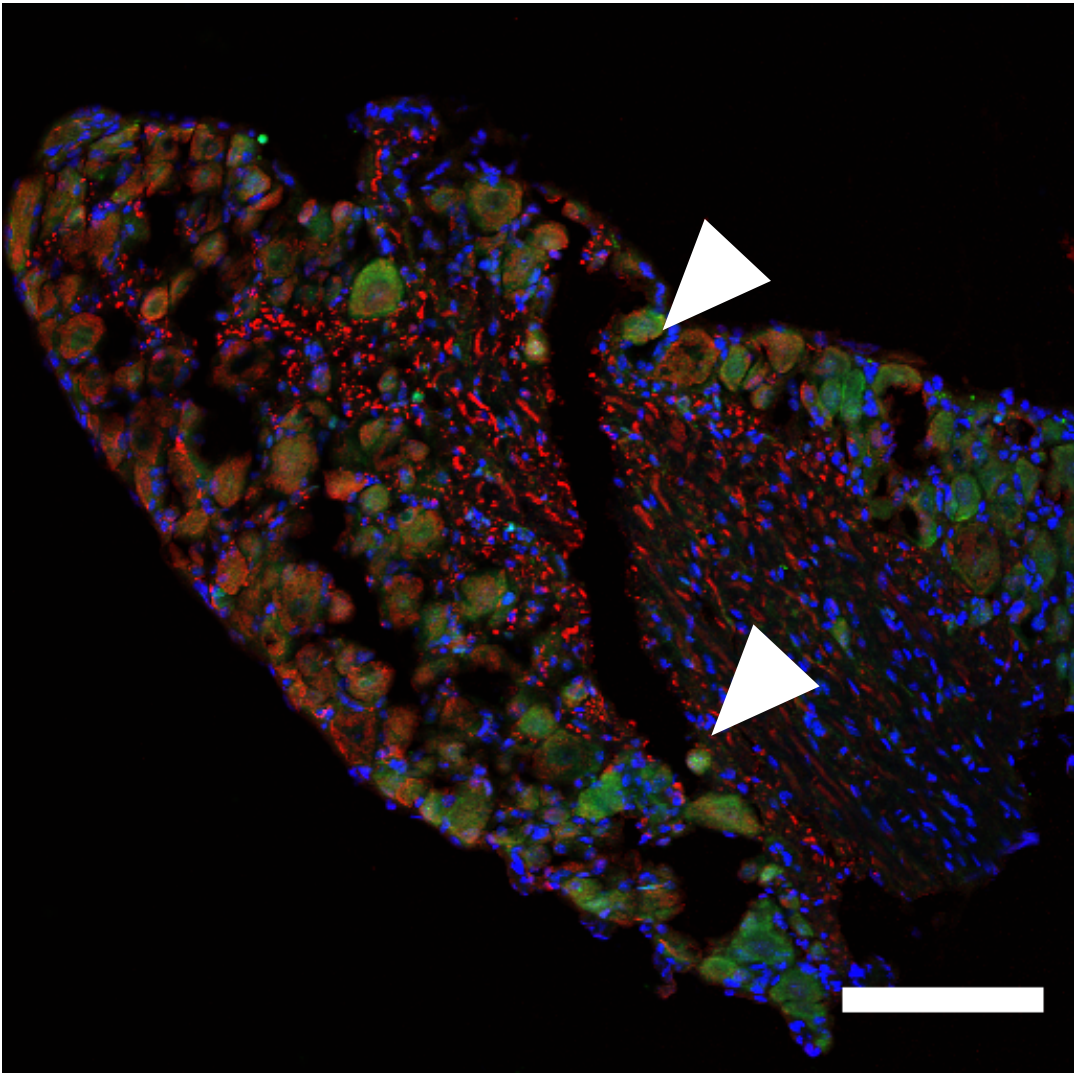

CB2-GFP PSNL

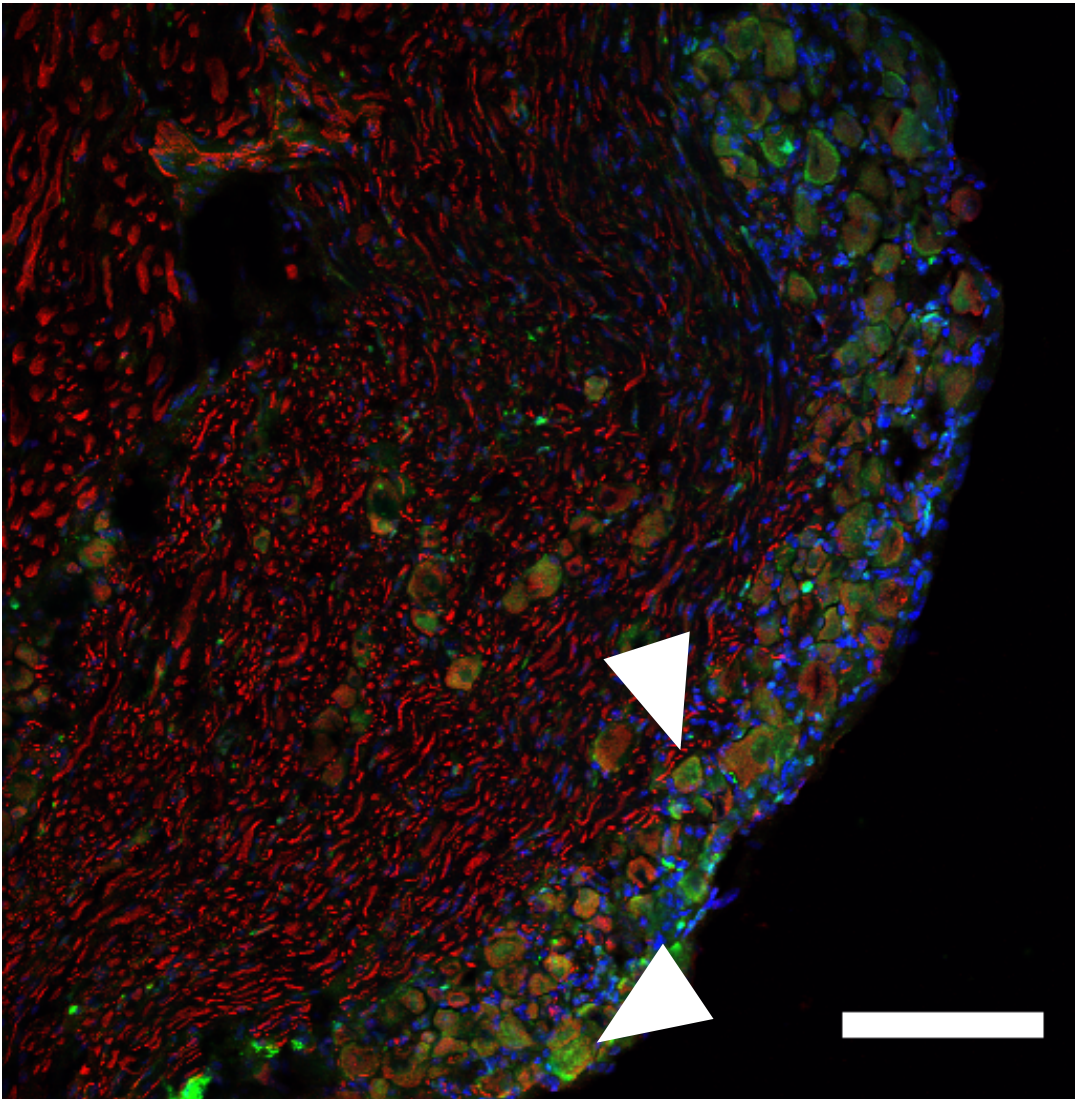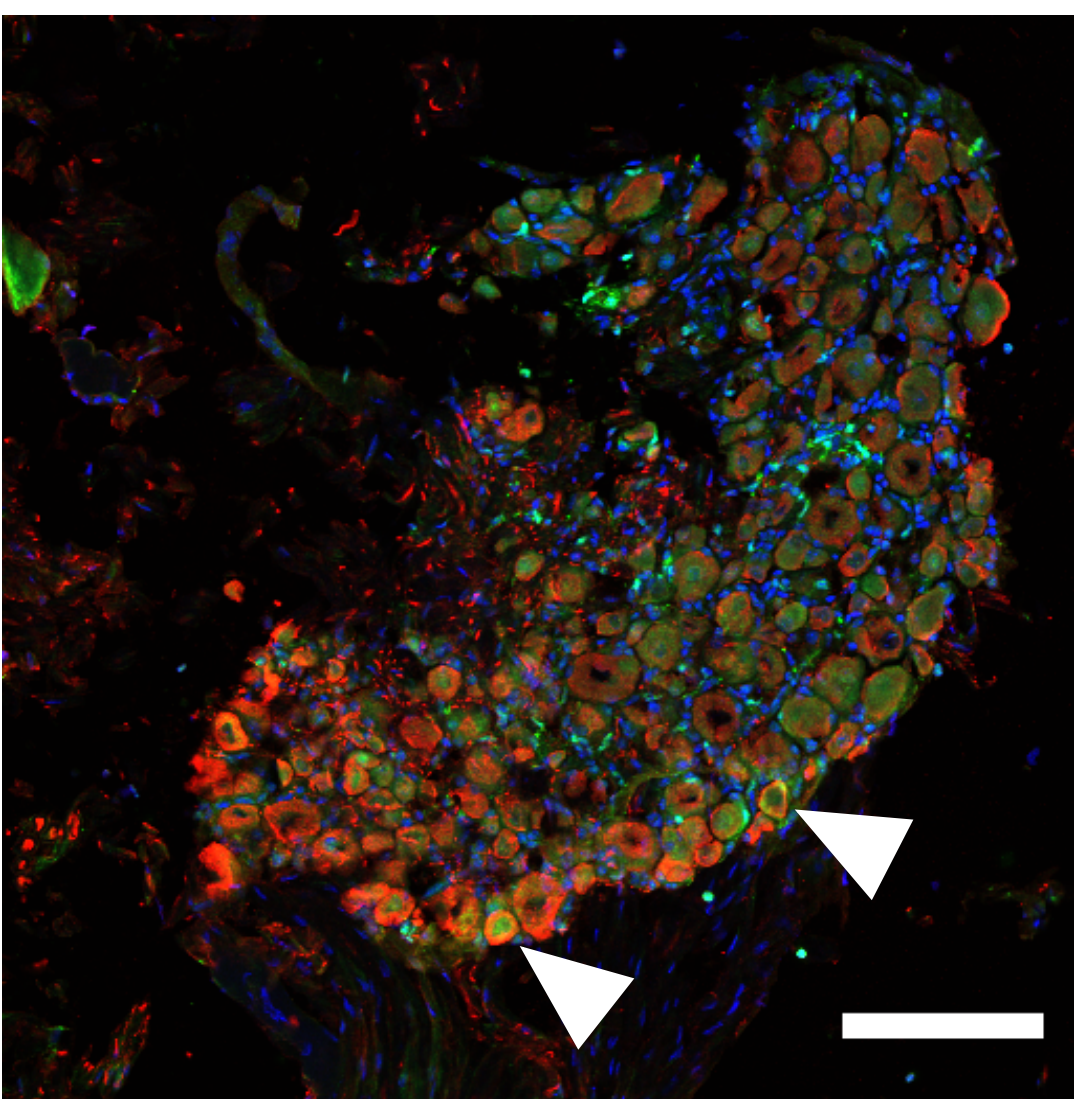

Supplement: supp [file elife-55582-supp-v1.zip › elife_poa_e55582_Figure_4_figure_supplement_6.pdf]

# Figure 5-figure supplement 1

**A**

## JWH133 Self-administration

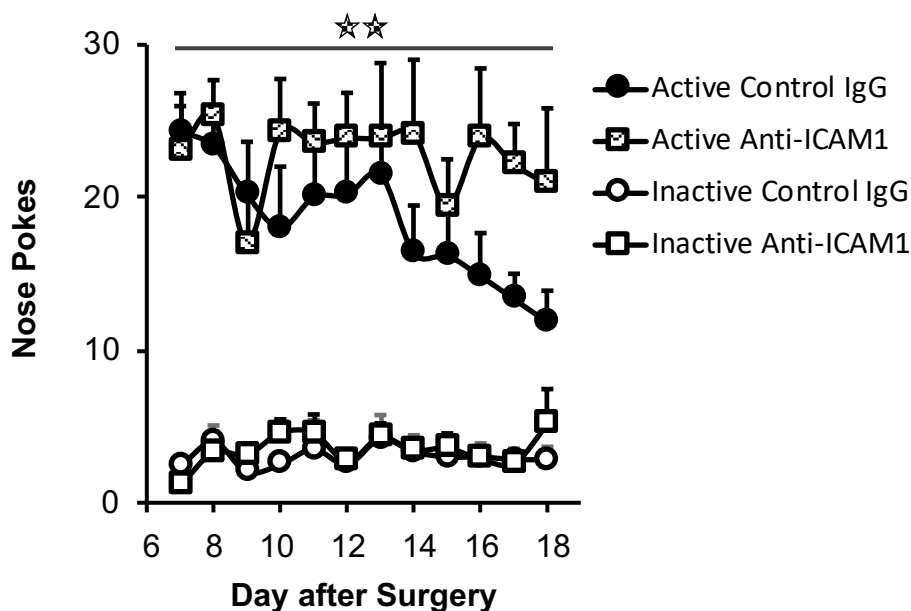

**B**

## Operant Training for Food

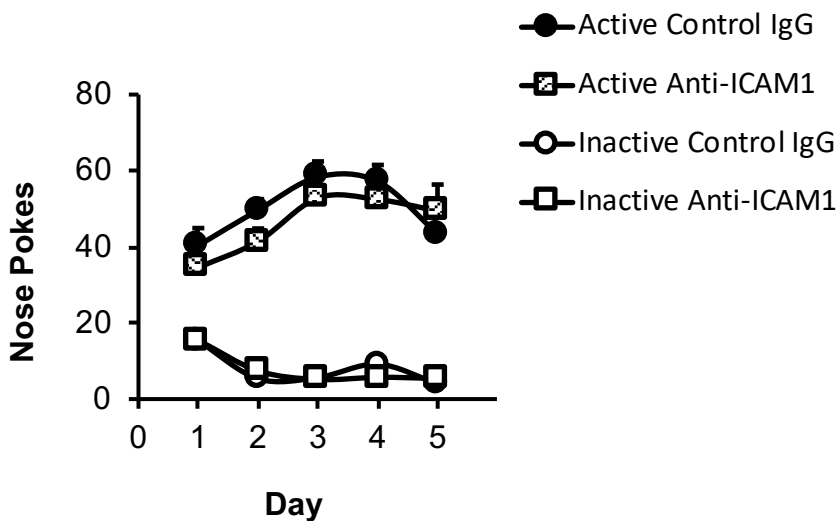

Supplement: supp [file elife-55582-supp-v1.zip › elife_poa_e55582_Figure_5_figure_supplement_1.pdf]
